# Supplementary material
Source: publisher site journal article supplement (https://www.spandidos-publications.com/3864/downloadSupplementary)
Supplement: Supplementary file 1 [file downloadSupplementary]

## Sheet: AD cells vs CS cells
Table SI. Genes differentially expressed in the KU-Lu-MPPt3 CS cells in comparison with the KU-Lu-MPPt3 AD cells.
ID	AD Avg (log2)	CS Avg (log2)	Fold change	Gene symbol	Description	Group
TC0800012277.hg.1	5	18.72	-13516.7	SFTPC	surfactant protein C	Multiple_Complex
TC1200009892.hg.1	5.48	17.08	-3111.56	OLR1	oxidized low density lipoprotein (lectin-like) receptor 1	Multiple_Complex
TC0100011402.hg.1	4.25	15.07	-1808.74	C4BPA	complement component 4 binding protein, alpha	Multiple_Complex
TC0100017113.hg.1	7.43	17.58	-1132.01	PIGR	polymeric immunoglobulin receptor	Multiple_Complex
TC0700008190.hg.1	6.88	17	-1116.15	CD36	CD36 molecule (thrombospondin receptor)	Multiple_Complex
TC1000008206.hg.1	8.34	18.21	-934.6	SFTPA1	surfactant protein A1	Multiple_Complex
TC0400008892.hg.1	5.37	15.1	-853.83	HHIP	hedgehog interacting protein	Multiple_Complex
TC0400010303.hg.1	4.47	13.77	-631.06	CCKAR	cholecystokinin A receptor	Coding
TC1500010162.hg.1	5.36	14.56	-590.18	RASGRF1	Ras protein-specific guanine nucleotide-releasing factor 1	Multiple_Complex
TC0200008485.hg.1	4.79	13.96	-575.94	AC008268.1	novel transcript	NonCoding
TC0600011517.hg.1	5.85	14.9	-531.87	HLA-DPA1	major histocompatibility complex, class II, DP alpha 1	Multiple_Complex
TC0700013347.hg.1	7.72	16.75	-523.46	AQP1	aquaporin 1 (Colton blood group)	Multiple_Complex
TC0X00006433.hg.1	4.53	13.51	-504.98	PLCXD1	phosphatidylinositol-specific phospholipase C, X domain containing 1	Multiple_Complex
TC0600011800.hg.1	4.47	13.45	-503.46	PGC	progastricsin (pepsinogen C)	Multiple_Complex
TC1000011178.hg.1	9.28	18.19	-481.9	SFTPA2; SFTPA1	surfactant protein A2; surfactant protein A1	Multiple_Complex
TC1900008132.hg.1	3.7	12.59	-474.84	CYP2B7P	cytochrome P450, family 2, subfamily B, polypeptide 7, pseudogene	Multiple_Complex
TC1800007015.hg.1	4.97	13.86	-474.47	TTR	transthyretin	Multiple_Complex
TC0300006985.hg.1	4.38	12.84	-350.52	CCR4	chemokine (C-C motif) receptor 4	Coding
TC1700006786.hg.1	6.5	14.92	-344.48	ALOX15B	arachidonate 15-lipoxygenase, type B	Multiple_Complex
TC0Y00006433.hg.1	4.93	13.3	-330.49	PLCXD1	phosphatidylinositol-specific phospholipase C, X domain containing 1	Multiple_Complex
TC0600007677.hg.1	5.59	13.96	-330.3	HLA-DPB1	major histocompatibility complex, class II, DP beta 1	Multiple_Complex
TC0600007650.hg.1	8.53	16.86	-321.11	HLA-DRA	major histocompatibility complex, class II, DR alpha	Coding
TC1100013165.hg.1	7.64	15.9	-306.37	SLC43A3	solute carrier family 43, member 3	Multiple_Complex
TC1100009408.hg.1	4.43	12.52	-272.14	SLC37A2	solute carrier family 37 (glucose-6-phosphate transporter), member 2	Multiple_Complex
TC1200010022.hg.1	8.09	16.17	-270.96	MGP	matrix Gla protein	Multiple_Complex
TC1100010055.hg.1	6.35	14.35	-256.43	SCUBE2	signal peptide, CUB domain, EGF-like 2	Multiple_Complex
TC0800009831.hg.1	4.86	12.8	-246.04	LGI3	leucine-rich repeat LGI family, member 3	Multiple_Complex
TC0600009238.hg.1	5.12	13.03	-240.38	RSPH4A	radial spoke head 4 homolog A (Chlamydomonas)	Coding
TC0300012397.hg.1	5.65	13.53	-235.5	PLXND1	plexin D1	Multiple_Complex
TC0100015476.hg.1	5.28	13.12	-229.33	HMGCS2	3-hydroxy-3-methylglutaryl-CoA synthase 2 (mitochondrial)	Multiple_Complex
TC0600009545.hg.1	4.11	11.85	-212.89	PDE7B	phosphodiesterase 7B	Multiple_Complex
TC1300008400.hg.1	3.43	11.14	-208.8	SHISA2	shisa family member 2	Coding
TC0800008126.hg.1	6.1	13.78	-204.9	CA2	carbonic anhydrase II	Multiple_Complex
TC2200007953.hg.1	7.69	15.33	-198.9	PRODH	proline dehydrogenase (oxidase) 1	Multiple_Complex
TC22_KI270734v1_random00006435.hg.1	6.77	14.4	-198.86	PRODH; LOC102724788; AC007325.2	Homo sapiens proline dehydrogenase (oxidase) 1 (PRODH), transcript variant 2, mRNA.; Homo sapiens proline dehydrogenase (oxidase) 1 (PRODH), transcript variant 1, mRNA.; proline dehydrogenase 1, mitochondrial; Homo sapiens proline dehydrogenase (oxidase) 1, mRNA (cDNA clone MGC:148079 IMAGE:40108133), complete cds.	Coding
TC0400012458.hg.1	7.64	15.15	-182.29	HPGD	hydroxyprostaglandin dehydrogenase 15-(NAD)	Multiple_Complex
TC0800011881.hg.1	5.64	13.1	-175.51	NDRG1	N-myc downstream regulated 1	Multiple_Complex
TC1900010805.hg.1	9.19	16.56	-166.05	CXCL17	chemokine (C-X-C motif) ligand 17	Coding
TC0600014273.hg.1	6.84	14.18	-161.4	HLA-DRB1	major histocompatibility complex, class II, DR beta 1	Multiple_Complex
TC1500010160.hg.1	10.94	18.27	-160.07	CTSH	cathepsin H	Multiple_Complex
TC0100015864.hg.1	4.54	11.71	-143.74	S100A6	S100 calcium binding protein A6	Multiple_Complex
TC1200007352.hg.1	5.36	12.51	-141.81	LRRK2	leucine-rich repeat kinase 2	Multiple_Complex
TC0300008933.hg.1	4.7	11.82	-138.82	CLDN18	claudin 18	Coding
TC0200016689.hg.1	5.8	12.9	-137.53	SLC4A5	solute carrier family 4 (sodium bicarbonate cotransporter), member 5	Multiple_Complex
TC0100009908.hg.1	4.87	11.97	-137.3	ECM1	extracellular matrix protein 1	Multiple_Complex
TC0200014382.hg.1	5.27	12.32	-132.83	TMEM163	transmembrane protein 163	Multiple_Complex
TC0500010480.hg.1	5.32	12.34	-129.69	PRLR	prolactin receptor	Multiple_Complex
TC1600010627.hg.1	3.71	10.67	-124.82	TPPP3	tubulin polymerization-promoting protein family member 3	Multiple_Complex
TC0X00008056.hg.1	10.53	17.49	-124.28	CLDN2	claudin 2	Coding
TC1000008204.hg.1	4.45	11.41	-124.27	flufor	Transcript Identified by AceView	Coding
TC0500009027.hg.1	6.55	13.46	-120.14	SCGB3A2	secretoglobin, family 3A, member 2	Multiple_Complex
TC1600008159.hg.1	5.6	12.45	-115.11	HSD11B2	hydroxysteroid (11-beta) dehydrogenase 2	Multiple_Complex
TC0X00007559.hg.1	4.82	11.66	-114.48	GJB1	gap junction protein beta 1	Coding
TC0700008192.hg.1	2.6	9.43	-114.46	starblaw	Transcript Identified by AceView	Unassigned
TC0100013278.hg.1	5.83	12.65	-113.7	TCEA3	transcription elongation factor A (SII), 3	Multiple_Complex
TC0100011245.hg.1	4.77	11.56	-110.56	ADORA1	adenosine A1 receptor	Multiple_Complex
TC1400009175.hg.1	5.74	12.52	-109.74	NID2	nidogen 2 (osteonidogen)	Multiple_Complex
TC1100010054.hg.1	6.82	13.6	-109.3	NRIP3	nuclear receptor interacting protein 3	Multiple_Complex
TC1300008668.hg.1	8.5	15.28	-109.18	LHFP	lipoma HMGIC fusion partner	Multiple_Complex
TC1800007850.hg.1	3.73	10.46	-106.68	COLEC12	collectin sub-family member 12	Multiple_Complex
TC0300013852.hg.1	4.44	11.12	-103.05	ST3GAL6	ST3 beta-galactoside alpha-2,3-sialyltransferase 6	Multiple_Complex
TC1700011653.hg.1	3.95	10.6	-100.41	SDK2	sidekick cell adhesion molecule 2	Multiple_Complex
TC0100014766.hg.1	5.82	12.21	-83.89	LPAR3	lysophosphatidic acid receptor 3	Multiple_Complex
TC0500012470.hg.1	11.03	17.4	-82.61	CD74	CD74 molecule, major histocompatibility complex, class II invariant chain	Multiple_Complex
TC0400011409.hg.1	3.63	9.96	-80.47	ADH1C	alcohol dehydrogenase 1C (class I), gamma polypeptide	Multiple_Complex
TC0500013301.hg.1	8.56	14.81	-76.1	DAB2	Dab, mitogen-responsive phosphoprotein, homolog 2 (Drosophila)	Multiple_Complex
TC1500009181.hg.1	4.01	10.25	-75.31	PLA2G4F	phospholipase A2, group IVF	Multiple_Complex
TC1900008134.hg.1	3.06	9.28	-74.39	CYP2B6	cytochrome P450, family 2, subfamily B, polypeptide 6	Multiple_Complex
TC0100008366.hg.1	3.43	9.64	-73.85	DIO1	deiodinase, iodothyronine, type I	Multiple_Complex
TC0X00010557.hg.1	4.69	10.84	-71.15	IL13RA2	interleukin 13 receptor, alpha 2	Multiple_Complex
TC0400010242.hg.1	8.88	14.97	-68.22	PPARGC1A	peroxisome proliferator-activated receptor gamma, coactivator 1 alpha	Multiple_Complex
TC0700012566.hg.1	5.09	11.17	-67.78			NonCoding
TC1400010777.hg.1	9.25	15.3	-66.06	TC2N	tandem C2 domains, nuclear	Multiple_Complex
TC1700010625.hg.1	8.52	14.54	-64.95	TNS4	tensin 4	Multiple_Complex
TC1100007445.hg.1	2.68	8.68	-64.16	CREB3L1	cAMP responsive element binding protein 3-like 1	Multiple_Complex
TC0800009891.hg.1	6.22	12.22	-63.76	STC1	stanniocalcin 1	Multiple_Complex
TC0100018271.hg.1	5.32	11.3	-63.5	OLFML3	olfactomedin like 3	Multiple_Complex
TC0100013223.hg.1	9.4	15.36	-62.28	RAP1GAP	RAP1 GTPase activating protein	Multiple_Complex
TC0300013645.hg.1	6.77	12.67	-59.85	APOD	apolipoprotein D	Multiple_Complex
TC1700010643.hg.1	5.52	11.37	-57.68	KRT40	keratin 40, type I	Coding
TC2200006651.hg.1	6.1	11.93	-57.14	LOC440792	Transcript Identified by AceView, Entrez Gene ID(s) 440792	Multiple_Complex
TC0100009275.hg.1	3.58	9.39	-56.31	AMYP1	amylase, alpha pseudogene 1	Pseudogene
TC0500006712.hg.1	5.65	11.46	-56.06	SNORD123; SNHG18	small nucleolar RNA, C/D box 123; small nucleolar RNA host gene 18	Multiple_Complex
TC0300013336.hg.1	9.49	15.28	-55.31	LAMP3	lysosomal-associated membrane protein 3	Multiple_Complex
TC0100009276.hg.1	7.88	13.65	-54.51	AMY1A; AMY1C	amylase, alpha 1A (salivary); amylase, alpha 1C (salivary)	Coding
TC0100017082.hg.1	7.07	12.81	-53.61	SLC26A9	solute carrier family 26 (anion exchanger), member 9	Multiple_Complex
TC0600007655.hg.1	3.39	9.12	-53.02			NonCoding
TC1600008218.hg.1	3.4	9.09	-51.78	HAS3	hyaluronan synthase 3	Multiple_Complex
TC0400010961.hg.1	4.91	10.59	-51.33	JCHAIN	joining chain of multimeric IgA and IgM	Multiple_Complex
TC1700011813.hg.1	5.68	11.32	-49.62	ST6GALNAC1	ST6 (alpha-N-acetyl-neuraminyl-2,3-beta-galactosyl-1,3)-N-acetylgalactosaminide alpha-2,6-sialyltransferase 1	Multiple_Complex
TC0100015784.hg.1	7.25	12.82	-47.53	SELENBP1	selenium binding protein 1	Multiple_Complex
TC1600009257.hg.1	8.95	14.51	-47.28	C16orf89	chromosome 16 open reading frame 89	Multiple_Complex
TC0100009341.hg.1	4.83	10.36	-46.31	KIAA1324	KIAA1324	Multiple_Complex
TC1900010386.hg.1	4.39	9.9	-45.49	CEBPA	CCAAT/enhancer binding protein (C/EBP), alpha	Coding
TC1100007817.hg.1	6.64	12.13	-45.14	RPLP0P2	ribosomal protein, large, P0 pseudogene 2	Multiple_Complex
TC0600007657.hg.1	4.85	10.34	-44.93	HLA-DQA1	major histocompatibility complex, class II, DQ alpha 1	Multiple_Complex
TC0700012140.hg.1	5.58	11.06	-44.61	LHFPL3-AS2	LHFPL3 antisense RNA 2	NonCoding
TC0600014276.hg.1	6.08	11.53	-43.86	HLA-DMB	major histocompatibility complex, class II, DM beta	Multiple_Complex
TC0800011887.hg.1	6	11.41	-42.42	ST3GAL1	ST3 beta-galactoside alpha-2,3-sialyltransferase 1	Multiple_Complex
TC0500012044.hg.1	3.88	9.28	-42.42	FSTL4	follistatin-like 4	Multiple_Complex
TC0X00008596.hg.1	7.84	13.24	-42.28	CDR1; CDR1-AS	Memczak2013 ANTISENSE, CDS, coding, downstream_end, upstream_start, UTR3, UTR5 best transcript NM_004065; CDR1 antisense RNA; CDR1 antisense RNA [Source:HGNC Symbol;Acc:HGNC:48926]	NonCoding
TC1600006888.hg.1	5.27	10.63	-41.07	CIITA	class II, major histocompatibility complex, transactivator	Multiple_Complex
TC0200014693.hg.1	4.26	9.61	-40.65	CYTIP	cytohesin 1 interacting protein	Multiple_Complex
TC1100007273.hg.1	6.56	11.9	-40.39	CD44	CD44 molecule (Indian blood group)	Multiple_Complex
TC0100015115.hg.1	7.78	13.11	-40.27	AMY1B; AMY1A	amylase, alpha 1B (salivary); amylase, alpha 1A (salivary)	Multiple_Complex
TC1200006786.hg.1	5.73	11.04	-39.78	TMEM52B	transmembrane protein 52B	Multiple_Complex
TC0200009955.hg.1	6.16	11.47	-39.75	CYBRD1	cytochrome b reductase 1	Multiple_Complex
TC0200016752.hg.1	3.09	8.39	-39.25	TTN	titin	Multiple_Complex
TC2200006883.hg.1	7.7	12.97	-38.55	SUSD2	sushi domain containing 2	Multiple_Complex
TC0400010785.hg.1	8.1	13.34	-37.86	IGFBP7	insulin like growth factor binding protein 7	Multiple_Complex
TC0700009352.hg.1	8.06	13.29	-37.64	TBXAS1	thromboxane A synthase 1 (platelet)	Multiple_Complex
TC1300009394.hg.1	3.52	8.75	-37.57	SLITRK6	SLIT and NTRK-like family, member 6	Coding
TC1100011602.hg.1	7.58	12.8	-37.26	UCP2	uncoupling protein 2 (mitochondrial, proton carrier)	Multiple_Complex
TC1900011196.hg.1	11.16	16.36	-36.71	NAPSA	napsin A aspartic peptidase	Multiple_Complex
TC0100009274.hg.1	8.13	13.32	-36.6	AMY1C; AMY1A	amylase, alpha 1C (salivary); amylase, alpha 1A (salivary)	Multiple_Complex
TC0100011413.hg.1	9.8	14.98	-36.37	CR2	complement component (3d/Epstein Barr virus) receptor 2	Multiple_Complex
TC0500012312.hg.1	8.17	13.35	-36.25	SPRY4	sprouty RTK signaling antagonist 4	Multiple_Complex
TC0100014910.hg.1	6.56	11.71	-35.7	TGFBR3	transforming growth factor beta receptor III	Multiple_Complex
TC0600011499.hg.1	6.37	11.5	-35.17	HLA-DQB1	major histocompatibility complex, class II, DQ beta 1	Multiple_Complex
TC1700009498.hg.1	5.75	10.86	-34.62	ATP2A3	ATPase, Ca++ transporting, ubiquitous	Multiple_Complex
TC1100009196.hg.1	5.41	10.51	-34.38	TMPRSS4	transmembrane protease, serine 4	Multiple_Complex
TC0900007488.hg.1	6.99	12.09	-34.36	PIP5K1B	phosphatidylinositol-4-phosphate 5-kinase, type I, beta	Multiple_Complex
TC1800008842.hg.1	4.5	9.57	-33.73	MC4R	melanocortin 4 receptor	Coding
TC0600014105.hg.1	4.73	9.76	-32.65	C2	complement component 2	Multiple_Complex
TC2100006997.hg.1	7.79	12.8	-32.4	CLIC6	chloride intracellular channel 6	Coding
TC2200007951.hg.1	4.69	9.71	-32.33	smorpy; snawpy	Transcript Identified by AceView	Multiple_Complex
TSUnmapped00000135.hg.1	4.39	9.38	-31.91	INPP5D	inositol polyphosphate-5-phosphatase D	Coding
TC1100007675.hg.1	5.76	10.7	-30.87	RTN4RL2	reticulon 4 receptor-like 2	Coding
TC0300013146.hg.1	8.08	13.02	-30.73	TNFSF10	tumor necrosis factor (ligand) superfamily, member 10	Multiple_Complex
TC0200014620.hg.1	6.34	11.28	-30.72	CACNB4	calcium channel, voltage-dependent, beta 4 subunit	Multiple_Complex
TC0400006540.hg.1	3.62	8.56	-30.54	FGFR3	fibroblast growth factor receptor 3	Multiple_Complex
TC0700007262.hg.1	6.71	11.62	-30.05	POU6F2	POU class 6 homeobox 2	Multiple_Complex
TC0200008797.hg.1	6.82	11.71	-29.74	SULT1C2	sulfotransferase family 1C member 2	Multiple_Complex
TC0300010577.hg.1	4.82	9.71	-29.69			NonCoding
TC1000008371.hg.1	3.89	8.76	-29.14			NonCoding
TC2000009216.hg.1	7.57	12.42	-28.93	SLPI	secretory leukocyte peptidase inhibitor	Multiple_Complex
TC0200010791.hg.1	9.05	13.89	-28.65	PNKD; MIR6810	paroxysmal nonkinesigenic dyskinesia; microRNA 6810	Multiple_Complex
TC1200008176.hg.1	5.09	9.93	-28.49	LGR5	leucine-rich repeat containing G protein-coupled receptor 5	Multiple_Complex
TC1100006876.hg.1	5.16	9.96	-27.89	MICALCL	MICAL C-terminal like	Multiple_Complex
TC2200006881.hg.1	7.64	12.44	-27.82	CABIN1	calcineurin binding protein 1	Multiple_Complex
TC0400007734.hg.1	9.14	13.94	-27.81	TMPRSS11E	transmembrane protease, serine 11E	Coding
TC1700008851.hg.1	5.32	10.12	-27.69	GPRC5C	G protein-coupled receptor, class C, group 5, member C	Multiple_Complex
TSUnmapped00000661.hg.1	2.87	7.64	-27.2	INPP5D	inositol polyphosphate-5-phosphatase D	Coding
TC1200012863.hg.1	11.13	15.89	-27.1	CCDC92	coiled-coil domain containing 92	NonCoding
TC0500013250.hg.1	5.22	9.97	-26.99	LOC101926941; AC005592.2	uncharacterized LOC101926941; novel transcript, antisense to SPRY4 and FGF1	NonCoding
TC0800007801.hg.1	4.32	9.06	-26.83	NKAIN3	Na+/K+ transporting ATPase interacting 3	Multiple_Complex
TC0100009900.hg.1	5.08	9.8	-26.41	CIART	circadian associated repressor of transcription	Multiple_Complex
TC0800010990.hg.1	3.75	8.47	-26.4	CA1	carbonic anhydrase I	Multiple_Complex
TC1400008957.hg.1	6.68	11.38	-26.07	PTCSC3	papillary thyroid carcinoma susceptibility candidate 3 (non-protein coding)	NonCoding
TC0X00010107.hg.1	7.1	11.79	-25.92	ZDHHC15	zinc finger, DHHC-type containing 15	Multiple_Complex
TC0200008124.hg.1	4.28	8.98	-25.83	LOC101927884; AC007099.1	uncharacterized LOC101927884; novel transcript, antisense to EVA1A	NonCoding
TC0100015596.hg.1	4.19	8.88	-25.68	LIX1L	limb and CNS expressed 1 like	Multiple_Complex
TC1100010696.hg.1	4.55	9.23	-25.6	CTD-2589M5.4	novel transcript	NonCoding
TC0100009572.hg.1	6.74	11.42	-25.56	FAM46C	family with sequence similarity 46, member C	Coding
TC0100008341.hg.1	5.94	10.61	-25.49	PODN	podocan	Multiple_Complex
TC1100007257.hg.1	9.99	14.66	-25.45	CAT	catalase	Multiple_Complex
TC0300008539.hg.1	7.47	12.13	-25.26	SLC15A2	solute carrier family 15 (oligopeptide transporter), member 2	Multiple_Complex
TC0200007261.hg.1	5.08	9.74	-25.17	QPCT	glutaminyl-peptide cyclotransferase	Multiple_Complex
TC1600010208.hg.1	4.5	9.14	-24.98			NonCoding
TC0400012086.hg.1	6.77	11.41	-24.97			NonCoding
TC1000009653.hg.1	5.05	9.69	-24.91			NonCoding
TC0900011305.hg.1	5.22	9.84	-24.55	TNC	tenascin C	Multiple_Complex
TC0600014277.hg.1	9.89	14.5	-24.47	HLA-DMA	major histocompatibility complex, class II, DM alpha	Multiple_Complex
TC0200009902.hg.1	8.96	13.57	-24.44	NOSTRIN	nitric oxide synthase trafficking	Multiple_Complex
TC0200012163.hg.1	4.5	9.1	-24.28	XDH	xanthine dehydrogenase	Multiple_Complex
TC0100009837.hg.1	3.03	7.62	-24.2	PDE4DIP	phosphodiesterase 4D interacting protein	Multiple_Complex
TC1300009678.hg.1	5.34	9.92	-23.85	SLC10A2	solute carrier family 10 (sodium/bile acid cotransporter), member 2	Coding
TC1400006534.hg.1	3.75	8.33	-23.85	RNASE6	ribonuclease, RNase A family, k6	Coding
TC0400012087.hg.1	5.17	9.73	-23.72	RP11-360A10.1	TEC	Unassigned
TC1100011614.hg.1	3.86	8.43	-23.69	KCNE3	potassium channel, voltage gated subfamily E regulatory beta subunit 3	Coding
TC0100011022.hg.1	6.63	11.19	-23.61	RGS2	regulator of G-protein signaling 2	Multiple_Complex
TC0300007529.hg.1	5.59	10.15	-23.6	CACNA2D3	calcium channel, voltage-dependent, alpha 2/delta subunit 3	Multiple_Complex
TC0X00007053.hg.1	10.07	14.61	-23.25	MAOA	monoamine oxidase A	Multiple_Complex
TC0900008953.hg.1	10.31	14.84	-23.1	ASS1	argininosuccinate synthase 1	Multiple_Complex
TC1900011195.hg.1	8.02	12.54	-23.06	NAPSB	napsin B aspartic peptidase, pseudogene	Multiple_Complex
TC0800012308.hg.1	6.19	10.72	-23.06	ADHFE1; C8orf46	alcohol dehydrogenase, iron containing 1; chromosome 8 open reading frame 46	Multiple_Complex
TC1400008705.hg.1	10.53	15.05	-23.04	SLC7A8	solute carrier family 7 (amino acid transporter light chain, L system), member 8	Multiple_Complex
TC1000007703.hg.1	7.88	12.39	-22.81	BICC1	BicC family RNA binding protein 1	Multiple_Complex
TC0100018499.hg.1	12.07	16.58	-22.7	MUC1	mucin 1, cell surface associated	Multiple_Complex
TC0400007775.hg.1	6.67	11.17	-22.66	ODAM	odontogenic, ameloblast asssociated	Multiple_Complex
TC0800011882.hg.1	3.33	7.83	-22.65	blufeyby	Transcript Identified by AceView	Coding
TC1200012864.hg.1	11.13	15.63	-22.64	CCDC92	coiled-coil domain containing 92	Multiple_Complex
TC0200016651.hg.1	7.73	12.23	-22.63	CYP1B1	cytochrome P450, family 1, subfamily B, polypeptide 1	Multiple_Complex
TC0200011251.hg.1	8.98	13.48	-22.6	MLPH	melanophilin	Multiple_Complex
TC0100009934.hg.1	6.6	11.09	-22.54	ANXA9	annexin A9	Multiple_Complex
TC0200006687.hg.1	8.95	13.44	-22.45	HPCAL1	hippocalcin-like 1	Multiple_Complex
TC0500007780.hg.1	5.99	10.47	-22.31	ARHGEF28	Rho guanine nucleotide exchange factor 28	Multiple_Complex
TC1900009970.hg.1	6.23	10.69	-22.11	BST2	bone marrow stromal cell antigen 2	Multiple_Complex
TC0100008182.hg.1	7.74	12.21	-22.09	CYP4X1	cytochrome P450, family 4, subfamily X, polypeptide 1	Multiple_Complex
TC0800012143.hg.1	5.61	10.06	-21.87	NAPRT	nicotinate phosphoribosyltransferase	Multiple_Complex
TC0900011565.hg.1	3.79	8.23	-21.83	ANGPTL2	angiopoietin like 2	Multiple_Complex
TC0500012588.hg.1	8.46	12.91	-21.81	HAVCR1	hepatitis A virus cellular receptor 1	Multiple_Complex
TC2100007204.hg.1	7.48	11.92	-21.76	FAM3B	family with sequence similarity 3, member B	Multiple_Complex
TC0200008867.hg.1	7.62	12.05	-21.53	ACOXL	acyl-CoA oxidase-like	Multiple_Complex
TC0500007826.hg.1	6.12	10.55	-21.5	IQGAP2	IQ motif containing GTPase activating protein 2	Multiple_Complex
TC0200014024.hg.1	6.35	10.77	-21.42	C1QL2	complement component 1, q subcomponent-like 2	Coding
TC0600007121.hg.1	3.91	8.29	-20.91			NonCoding
TC1200009420.hg.1	5.28	9.66	-20.82	ADGRD1	adhesion G protein-coupled receptor D1	Multiple_Complex
TC0400009090.hg.1	7.88	12.26	-20.78	TDO2	tryptophan 2,3-dioxygenase	Multiple_Complex
TC0100015871.hg.1	6.49	10.86	-20.66	S100A16	S100 calcium binding protein A16	Multiple_Complex
TC0700011953.hg.1	4.92	9.28	-20.58	CYP3A5	cytochrome P450, family 3, subfamily A, polypeptide 5	Multiple_Complex
TC0300007259.hg.1	7.48	11.84	-20.43	CCRL2	chemokine (C-C motif) receptor-like 2	Multiple_Complex
TC0X00007045.hg.1	4.98	9.33	-20.39	RP1-154K9.2; LOC100287292	Transcript Identified by AceView, Entrez Gene ID(s) 100287292; novel transcript	NonCoding
TC1100010514.hg.1	12.67	16.98	-19.86	ELF5	E74-like factor 5 (ets domain transcription factor)	Multiple_Complex
TC0100015872.hg.1	8.45	12.74	-19.58	S100A14	S100 calcium binding protein A14	Multiple_Complex
TC0400011408.hg.1	3.12	7.41	-19.53	ADH1B	alcohol dehydrogenase 1B (class I), beta polypeptide	Multiple_Complex
TC0700011692.hg.1	6.64	10.92	-19.45	KIAA1324L	KIAA1324-like	Multiple_Complex
TC0100015113.hg.1	6.75	11.02	-19.34	RP5-1108M17.5		Multiple_Complex
TC0X00006955.hg.1	4.29	8.55	-19.24	LANCL3	LanC lantibiotic synthetase component C-like 3 (bacterial)	Coding
TC0200015031.hg.1	9.32	13.57	-19.02	HAGLR	HOXD antisense growth-associated long non-coding RNA	NonCoding
TC0600012801.hg.1	8.77	13.02	-19	SESN1	sestrin 1	Multiple_Complex
TC0500008937.hg.1	3.05	7.29	-18.88	AC005592.3	novel transcript	NonCoding
TC1700010036.hg.1	8.63	12.87	-18.86	ALDH3A1	aldehyde dehydrogenase 3 family, member A1	Multiple_Complex
TC0300008550.hg.1	5.67	9.9	-18.77	CSTA	cystatin A (stefin A)	Multiple_Complex
TC0600007120.hg.1	3.42	7.65	-18.76	vorflorby	Transcript Identified by AceView	NonCoding
TC1700009036.hg.1	5.34	9.56	-18.63	TMC8	transmembrane channel like 8	Multiple_Complex
TC1600010394.hg.1	9.37	13.59	-18.61	CES1	carboxylesterase 1	Multiple_Complex
TC0600007959.hg.1	5.43	9.65	-18.6	DAAM2	dishevelled associated activator of morphogenesis 2	Multiple_Complex
TC1200011208.hg.1	6.84	11.04	-18.37			NonCoding
TC1500009641.hg.1	7.71	11.91	-18.36	RORA	RAR-related orphan receptor A	Multiple_Complex
TC0300013068.hg.1	9.51	13.71	-18.32	MECOM	MDS1 and EVI1 complex locus	Multiple_Complex
TC0400012924.hg.1	3.53	7.71	-18.12	UGT2B15	UDP glucuronosyltransferase 2 family, polypeptide B15	Coding
TC1000008369.hg.1	3.56	7.73	-18.05	nehoro	Transcript Identified by AceView	Multiple_Complex
TC0700011318.hg.1	10.28	14.45	-18.01	ERV3-1; ZNF117	endogenous retrovirus group 3, member 1; zinc finger protein 117	Multiple_Complex
TC1200011470.hg.1	11.25	15.41	-17.92	DUSP6	dual specificity phosphatase 6	Multiple_Complex
TC2000008722.hg.1	8.33	12.49	-17.86	ACSS1	acyl-CoA synthetase short-chain family member 1	Multiple_Complex
TC1100007729.hg.1	6.55	10.7	-17.69	DTX4	deltex 4, E3 ubiquitin ligase	Multiple_Complex
TC0Y00006860.hg.1	2.43	6.57	-17.63	skarbu	Transcript Identified by AceView	Coding
TC1100007262.hg.1	9.81	13.91	-17.19	EHF	ets homologous factor	Multiple_Complex
TC0100012247.hg.1	5.25	9.35	-17.13	KIF26B	kinesin family member 26B	Multiple_Complex
TC0400011746.hg.1	8.87	12.96	-16.96	TMEM155	transmembrane protein 155	Multiple_Complex
TC0200011253.hg.1	6.27	10.33	-16.75	smeedoybu	Transcript Identified by AceView	Coding
TC0100010244.hg.1	8.91	12.97	-16.71	IFI16	interferon, gamma-inducible protein 16	Multiple_Complex
TC0600014318.hg.1	6.66	10.71	-16.52	FAM46A	family with sequence similarity 46, member A	Coding
TC0400012836.hg.1	9.29	13.33	-16.47	ENPEP	glutamyl aminopeptidase (aminopeptidase A)	Multiple_Complex
TC0600007598.hg.1	6.39	10.43	-16.47	AIF1	allograft inflammatory factor 1	Multiple_Complex
TC0900009860.hg.1	11.41	15.43	-16.28	AQP3	aquaporin 3 (Gill blood group)	Multiple_Complex
TC1200010185.hg.1	9.61	13.63	-16.2	ITPR2	inositol 1,4,5-trisphosphate receptor, type 2	Multiple_Complex
TC1900010025.hg.1	5.56	9.56	-16.04	CRLF1	cytokine receptor-like factor 1	Multiple_Complex
TC0300013084.hg.1	3.54	7.54	-16.01	LRRC31	leucine rich repeat containing 31	Multiple_Complex
TC1500007695.hg.1	8.19	12.18	-15.96	PAQR5	progestin and adipoQ receptor family member V	Multiple_Complex
TC0100018262.hg.1	7.97	11.96	-15.88	GSTM2	glutathione S-transferase mu 2 (muscle)	Multiple_Complex
TC0700010420.hg.1	6.42	10.39	-15.63	ASS1P11	argininosuccinate synthetase 1 pseudogene 11 [Source:HGNC Symbol;Acc:HGNC:761]	Pseudogene
TC0800011814.hg.1	8.93	12.89	-15.55	GSDMC	gasdermin C	Multiple_Complex
TC0X00009493.hg.1	3.89	7.84	-15.47	EFHC2	EF-hand domain (C-terminal) containing 2	Multiple_Complex
TC1900010807.hg.1	10.86	14.8	-15.42	CEACAM1	carcinoembryonic antigen-related cell adhesion molecule 1 (biliary glycoprotein)	Multiple_Complex
TC1000011487.hg.1	8.24	12.18	-15.36	SORBS1	sorbin and SH3 domain containing 1	Multiple_Complex
TC0100015023.hg.1	8.99	12.92	-15.34	DPYD	dihydropyrimidine dehydrogenase	Multiple_Complex
TC0300014086.hg.1	4.95	8.89	-15.29	ATP13A4	ATPase type 13A4	Multiple_Complex
TC1200011961.hg.1	9.2	13.13	-15.26	TMEM116	transmembrane protein 116	Multiple_Complex
TC1100007394.hg.1	7.08	11.01	-15.21	CD82	CD82 molecule	Multiple_Complex
TC1900010747.hg.1	3.61	7.53	-15.18	B3GNT8	UDP-GlcNAc:betaGal beta-1,3-N-acetylglucosaminyltransferase 8	Multiple_Complex
TC2100008261.hg.1	3.63	7.55	-15.15	LOC101928233; AP001626.1	uncharacterized LOC101928233; novel transcript	NonCoding
TC0600014336.hg.1	10.56	14.47	-15.01	ROS1	ROS proto-oncogene 1 , receptor tyrosine kinase	Multiple_Complex
TC1100007275.hg.1	3.99	7.89	-14.93	sterchee	Transcript Identified by AceView	Unassigned
TC0300009916.hg.1	10.06	13.94	-14.77	HES1	hes family bHLH transcription factor 1	Multiple_Complex
TC1100013221.hg.1	5.68	9.56	-14.67	CASP1	caspase 1	Multiple_Complex
TC0100009846.hg.1	2.47	6.32	-14.44	PDE4DIP	Transcript Identified by AceView, Entrez Gene ID(s) 9659	Unassigned
TC1200008133.hg.1	4.4	8.25	-14.43	LYZ	lysozyme	Multiple_Complex
TC0100018246.hg.1	5.24	9.08	-14.36	LRRC8C	leucine rich repeat containing 8 family, member C	Multiple_Complex
TC0200010053.hg.1	5.1	8.95	-14.34	HOXD1; MIR7704	homeobox D1; microRNA 7704	Multiple_Complex
TC1900006973.hg.1	3.71	7.55	-14.34			NonCoding
TC0100018249.hg.1	7.44	11.27	-14.2	AMY2B; ACTG1P4	amylase, alpha 2B (pancreatic); actin gamma 1 pseudogene 4	Multiple_Complex
TC0500008470.hg.1	3.19	7	-14.09	SNCAIP	synuclein alpha interacting protein	Multiple_Complex
TC1100006580.hg.1	4.86	8.67	-14.05	KCNQ1	potassium channel, voltage gated KQT-like subfamily Q, member 1	Multiple_Complex
TC1200010193.hg.1	3.14	6.94	-13.95	neychaw	Transcript Identified by AceView	Unassigned
TC1600008139.hg.1	6.3	10.08	-13.76	CES4A	carboxylesterase 4A	Multiple_Complex
TC0400011043.hg.1	9.44	13.22	-13.72	CDKL2	cyclin-dependent kinase-like 2 (CDC2-related kinase)	Multiple_Complex
TC0700010965.hg.1	3.73	7.51	-13.7	IGFBP3	insulin like growth factor binding protein 3	Multiple_Complex
TC0700011624.hg.1	3.51	7.28	-13.68	GNAT3	guanine nucleotide binding protein, alpha transducing 3	Coding
TC0700012526.hg.1	4.72	8.48	-13.53	AC010655.1	Uncharacterized protein [Source:UniProtKB/TrEMBL;Acc:A0A096LNY8]	Coding
TC0400012644.hg.1	8.88	12.63	-13.49	SORBS2	sorbin and SH3 domain containing 2	Multiple_Complex
TC2100007140.hg.1	10.47	14.22	-13.48	ETS2	v-ets avian erythroblastosis virus E26 oncogene homolog 2	Multiple_Complex
TC0400011464.hg.1	10.76	14.48	-13.2	MANBA	mannosidase, beta A, lysosomal	Multiple_Complex
TC0700011834.hg.1	9.37	13.08	-13.08	PON3	paraoxonase 3	Multiple_Complex
TC0600011491.hg.1	3.31	7.02	-13.08	HLA-DRB5	major histocompatibility complex, class II, DR beta 5	Multiple_Complex
TC0100007936.hg.1	10.64	14.34	-13.06	MFSD2A	major facilitator superfamily domain containing 2A	Multiple_Complex
TC0600009783.hg.1	7.07	10.77	-13.03	UST	uronyl-2-sulfotransferase	Multiple_Complex
TC0200016753.hg.1	4.79	8.49	-12.96	CCDC141	coiled-coil domain containing 141	Multiple_Complex
TC0500011596.hg.1	12	15.66	-12.66	SLCO4C1	solute carrier organic anion transporter family, member 4C1	Coding
TC0100012421.hg.1	9.01	12.67	-12.64	FAM41C	family with sequence similarity 41, member C	Multiple_Complex
TC1500008360.hg.1	6.04	9.7	-12.62	SLCO3A1	solute carrier organic anion transporter family, member 3A1	Multiple_Complex
TC0500011710.hg.1	2.72	6.36	-12.43			NonCoding
TC0100006455.hg.1	7.86	11.49	-12.36	AC114498.1		Precursor_microRNA
TC1700010626.hg.1	5.86	9.49	-12.33	sormu	Transcript Identified by AceView	Unassigned
TC0100016983.hg.1	4.51	8.12	-12.22	CHI3L1	chitinase 3-like 1 (cartilage glycoprotein-39)	Multiple_Complex
TC1700010624.hg.1	4.01	7.61	-12.13	RP11-58O9.2	TEC	NonCoding
TC0900011603.hg.1	11.9	15.5	-12.12	ENG	endoglin	Multiple_Complex
TC1100006760.hg.1	9.35	12.95	-12.09	PPFIBP2	PTPRF interacting protein, binding protein 2 (liprin beta 2)	Multiple_Complex
TC0700012444.hg.1	10.67	14.25	-11.96	CADPS2	Ca++-dependent secretion activator 2	Multiple_Complex
TC0100015685.hg.1	6.34	9.91	-11.84	LOC653513	Homo sapiens phosphodiesterase 4D interacting protein pseudogene (LOC653513), non-coding RNA.	Multiple_Complex
TC0100011254.hg.1	6.02	9.58	-11.82	leykarbu	Transcript Identified by AceView	Coding
TC0X00007493.hg.1	5.82	9.38	-11.8	AR	androgen receptor	Multiple_Complex
TC1600009943.hg.1	5.54	9.09	-11.72	SEZ6L2	seizure related 6 homolog (mouse)-like 2	Multiple_Complex
TC0300008853.hg.1	9.57	13.1	-11.62	TMEM108	transmembrane protein 108	Multiple_Complex
TC1100010531.hg.1	4.66	8.2	-11.57	SLC1A2	solute carrier family 1 (glial high affinity glutamate transporter), member 2	Multiple_Complex
TC0200016047.hg.1	5.19	8.72	-11.55	NPPC	natriuretic peptide C	Coding
TC0500013392.hg.1	10.65	14.18	-11.54	CCNJL	cyclin J-like	Multiple_Complex
TC1600011375.hg.1	9.39	12.91	-11.53	QPRT	quinolinate phosphoribosyltransferase	Multiple_Complex
TC0800012185.hg.1	6.57	10.09	-11.5	OPLAH	5-oxoprolinase (ATP-hydrolysing)	Multiple_Complex
TC1100010876.hg.1	3.27	6.8	-11.48	OR5G5P; OR5G3	olfactory receptor, family 5, subfamily G, member 5 pseudogene; olfactory receptor, family 5, subfamily G, member 3 (gene/pseudogene)	Multiple_Complex
TC1600007955.hg.1	6.04	9.56	-11.45	MT3	metallothionein 3	Multiple_Complex
TC2100008536.hg.1	6.04	9.55	-11.44	PCBP3	poly(rC) binding protein 3	Multiple_Complex
TC0200016770.hg.1	6.76	10.27	-11.42	MIR6809; TNS1	microRNA 6809; tensin 1	Multiple_Complex
TC2200009236.hg.1	8.03	11.53	-11.29	GGT1	gamma-glutamyltransferase 1	Multiple_Complex
TC0600013010.hg.1	12.66	16.15	-11.27	MAN1A1	mannosidase, alpha, class 1A, member 1	Multiple_Complex
TC0X00006891.hg.1	5.96	9.45	-11.22	GK	glycerol kinase	Multiple_Complex
TC0300008316.hg.1	9.69	13.17	-11.16	PVRL3	poliovirus receptor-related 3	Multiple_Complex
TC1100011867.hg.1	6.9	10.38	-11.14	FZD4	frizzled class receptor 4	Coding
TC0200013286.hg.1	6.37	9.85	-11.12	SFTPB	surfactant protein B	Multiple_Complex
TC1100006875.hg.1	4.42	7.89	-11.06	gogloy	Transcript Identified by AceView	Coding
TC1200010111.hg.1	3.59	7.05	-11.02	ABCC9	ATP binding cassette subfamily C member 9	Coding
TC0400007868.hg.1	12.9	16.36	-11.01	PARM1	prostate androgen-regulated mucin-like protein 1	Multiple_Complex
TC0X00009233.hg.1	5.63	9.09	-10.98	PTCHD1-AS	PTCHD1 antisense RNA (head to head)	NonCoding
TC1200011206.hg.1	8.32	11.77	-10.94	RP11-611O2.5	novel transcript	NonCoding
TC0800012323.hg.1	9.78	13.22	-10.9	CA13	carbonic anhydrase XIII	Multiple_Complex
TC0500007384.hg.1	6.26	9.7	-10.87	ASS1P9	argininosuccinate synthetase 1 pseudogene 9 [Source:HGNC Symbol;Acc:HGNC:772]	Pseudogene
TC1400009989.hg.1	3.57	7	-10.76	RP11-747H7.3	novel transcript, intronic to CATSPERB	NonCoding
TC0700013342.hg.1	5.79	9.21	-10.73	CHN2	chimerin 2	Multiple_Complex
TC0200014771.hg.1	4.27	7.69	-10.71	FAP	fibroblast activation protein alpha	Multiple_Complex
TC0500010852.hg.1	4.22	7.63	-10.64	kuflu	Transcript Identified by AceView	Unassigned
TC0200016769.hg.1	8.49	11.89	-10.61			NonCoding
TC0400010244.hg.1	3.15	6.56	-10.6	pogu	Transcript Identified by AceView	Coding
TC0X00009239.hg.1	5.07	8.48	-10.59			NonCoding
TC0500007585.hg.1	5.84	9.24	-10.56	RNF180	ring finger protein 180	Coding
TC0200013298.hg.1	11.81	15.21	-10.53	ST3GAL5	ST3 beta-galactoside alpha-2,3-sialyltransferase 5	Multiple_Complex
TC0900010591.hg.1	6.79	10.18	-10.52	SLC28A3	solute carrier family 28 (concentrative nucleoside transporter), member 3	Multiple_Complex
TC1700008247.hg.1	4.81	8.21	-10.51	TMEM92	transmembrane protein 92	Multiple_Complex
TC0500009861.hg.1	5.7	9.09	-10.49	SLC6A3	solute carrier family 6 (neurotransmitter transporter), member 3	Multiple_Complex
TC0600009606.hg.1	8.45	11.83	-10.42	ARFGEF3	ARFGEF family member 3	Multiple_Complex
TC0500012164.hg.1	5.66	9.04	-10.39	GFRA3	GDNF family receptor alpha 3	Multiple_Complex
TC0600011590.hg.1	7.35	10.72	-10.37	SPDEF	SAM pointed domain containing ETS transcription factor	Coding
TC0X00009128.hg.1	9.6	12.97	-10.34	ACE2	angiotensin I converting enzyme 2	Multiple_Complex
TC1400009684.hg.1	8.25	11.62	-10.34	ALDH6A1	aldehyde dehydrogenase 6 family, member A1	Multiple_Complex
TC0600009456.hg.1	6.99	10.36	-10.28	ENPP3	ectonucleotide pyrophosphatase/phosphodiesterase 3	Multiple_Complex
TC1900011758.hg.1	8.09	11.45	-10.23	APOE	apolipoprotein E	Multiple_Complex
TC1600008021.hg.1	10.43	13.78	-10.18	MMP15	matrix metallopeptidase 15 (membrane-inserted)	Multiple_Complex
TC1600010395.hg.1	5.7	9.03	-10.04	slosno	Transcript Identified by AceView	Coding
TC0600007679.hg.1	2.98	6.3	-10.03	HLA-DPB2	major histocompatibility complex, class II, DP beta 2 (pseudogene)	Multiple_Complex
TC1800006852.hg.1	6.98	10.3	-9.97	GATA6	GATA binding protein 6	Coding
TC1200006996.hg.1	7.75	11.06	-9.93	PIK3C2G	phosphatidylinositol-4-phosphate 3-kinase, catalytic subunit type 2 gamma	Multiple_Complex
TC1200012299.hg.1	2.82	6.11	-9.77	RP11-214K3.18	novel transcript, sense intronic to CCDC92	NonCoding
TC0500011708.hg.1	3.88	7.17	-9.75			NonCoding
TC1600007959.hg.1	11.67	14.96	-9.74	MT1E	metallothionein 1E	Multiple_Complex
TC2000007204.hg.1	7.61	10.89	-9.74	snarsawbu	Transcript Identified by AceView	Unassigned
TC0400012022.hg.1	3.77	7.05	-9.72	uc_338	TUC338 [Source:RFAM;Acc:RF02271]	NonCoding
TC2100007821.hg.1	9.89	13.17	-9.7	ADAMTS1	ADAM metallopeptidase with thrombospondin type 1 motif 1	Multiple_Complex
TC0200007463.hg.1	3.63	6.91	-9.7	mono	Transcript Identified by AceView	Unassigned
TC0700009083.hg.1	11.49	14.77	-9.69	AHCYL2	adenosylhomocysteinase-like 2	Multiple_Complex
TC0600011081.hg.1	4.11	7.39	-9.69	ASS1P1	argininosuccinate synthetase 1 pseudogene 1 [Source:HGNC Symbol;Acc:HGNC:759]	Pseudogene
TC0300013147.hg.1	3.39	6.67	-9.69	slukeebu	Transcript Identified by AceView	Coding
TC0300009459.hg.1	10.89	14.16	-9.68	GPR160	G protein-coupled receptor 160	Multiple_Complex
TC1100012966.hg.1	8.99	12.26	-9.67	MICAL2	microtubule associated monooxygenase, calponin and LIM domain containing 2	Multiple_Complex
TC0X00011180.hg.1	3.42	6.69	-9.64	RENBP	renin binding protein	Multiple_Complex
TC0200016489.hg.1	6.2	9.47	-9.63	GGT8P	gamma-glutamyltransferase 8 pseudogene	Multiple_Complex
TC0100010544.hg.1	4.87	8.14	-9.61	momybu	Transcript Identified by AceView	Unassigned
TC0200014887.hg.1	3.18	6.45	-9.6	zawgawbo	Transcript Identified by AceView	Unassigned
TC0100010155.hg.1	9.61	12.87	-9.58	SEMA4A	sema domain, immunoglobulin domain (Ig), transmembrane domain (TM) and short cytoplasmic domain, (semaphorin) 4A	Multiple_Complex
TC0300006477.hg.1	5.92	9.18	-9.56	ITPR1	inositol 1,4,5-trisphosphate receptor, type 1	Multiple_Complex
TC0100014617.hg.1	4.55	7.8	-9.5	SLC44A5	solute carrier family 44, member 5	Multiple_Complex
TC0300011455.hg.1	7.51	10.75	-9.48	FRMD4B	FERM domain containing 4B	Multiple_Complex
TC1700007124.hg.1	6.84	10.09	-9.48	KRT16P1	keratin 16 pseudogene 1	Multiple_Complex
TC1600007936.hg.1	6.34	9.59	-9.48	SLC6A2	solute carrier family 6 (neurotransmitter transporter), member 2	Multiple_Complex
TC2200007894.hg.1	3.11	6.36	-9.47	CECR1	cat eye syndrome chromosome region, candidate 1	Multiple_Complex
TC1100006874.hg.1	2.85	6.1	-9.47	slakeyby	Transcript Identified by AceView	Coding
TC0300014082.hg.1	13.32	16.56	-9.43	ETV5	ets variant 5	Multiple_Complex
TC0100009273.hg.1	5.89	9.13	-9.41	AMY2A	amylase, alpha 2A (pancreatic)	Multiple_Complex
TC0500012313.hg.1	6.2	9.43	-9.37	SPRY4-IT1	SPRY4 intronic transcript 1	NonCoding
TC0300009632.hg.1	7.01	10.23	-9.33	SOX2	SRY box 2	Coding
TC1200012296.hg.1	6.87	10.09	-9.32	RP11-214K3.21	novel transcript, sense intronic to CCDC92	NonCoding
TC0400006491.hg.1	6.51	9.73	-9.3	IDUA	iduronidase, alpha-L-	Multiple_Complex
TC0X00009969.hg.1	3.39	6.61	-9.3	TEX11	testis expressed 11	Multiple_Complex
TC0100006516.hg.1	6.63	9.83	-9.21	VWA1	von Willebrand factor A domain containing 1	Coding
TC0500010199.hg.1	5.64	8.84	-9.19	FAM134B	family with sequence similarity 134, member B	Multiple_Complex
TC1700008552.hg.1	2.92	6.12	-9.17	mawsloy	Transcript Identified by AceView	Coding
TC0500007586.hg.1	6.11	9.28	-9.04	RGS7BP	regulator of G-protein signaling 7 binding protein	Multiple_Complex
TC0500007050.hg.1	5.79	8.96	-9.03	PDZD2	PDZ domain containing 2	Multiple_Complex
TC0100007372.hg.1	8.05	11.22	-9	NCMAP	noncompact myelin associated protein	Multiple_Complex
TC1100009617.hg.1	4.09	7.26	-8.96	GLB1L3	galactosidase beta 1 like 3	Multiple_Complex
TC1700007796.hg.1	9.79	12.94	-8.89	IGFBP4	insulin like growth factor binding protein 4	Multiple_Complex
TC0100016664.hg.1	6.6	9.75	-8.87	COLGALT2	collagen beta(1-O)galactosyltransferase 2	Multiple_Complex
TC1700008372.hg.1	11.99	15.13	-8.82	SCPEP1	serine carboxypeptidase 1	Multiple_Complex
TC1700007752.hg.1	2.87	6.02	-8.82	PPP1R1B	protein phosphatase 1, regulatory (inhibitor) subunit 1B	Multiple_Complex
TC1400009738.hg.1	9.19	12.33	-8.81	TGFB3	transforming growth factor beta 3	Multiple_Complex
TC1700008794.hg.1	8.12	11.26	-8.81	SOX9	SRY box 9	Multiple_Complex
TC1900007384.hg.1	8.67	11.8	-8.77	GDF15	growth differentiation factor 15	Multiple_Complex
TC0100009736.hg.1	9.77	12.9	-8.74	CH17-262O2.2		Pseudogene
TC1200012111.hg.1	9.75	12.87	-8.74	TAOK3	TAO kinase 3	Multiple_Complex
TC1200012680.hg.1	13.3	16.43	-8.72	ACSS3	acyl-CoA synthetase short-chain family member 3	Multiple_Complex
TC0400007098.hg.1	6.91	10.03	-8.71			NonCoding
TC0X00006863.hg.1	4.66	7.78	-8.71			NonCoding
TC1200010130.hg.1	6.54	9.65	-8.67	SOX5	SRY box 5	Multiple_Complex
TC0100018528.hg.1	12.92	16.03	-8.66	CREG1	cellular repressor of E1A-stimulated genes 1	Multiple_Complex
TC1900007385.hg.1	4.02	7.13	-8.59	MIR3189	microRNA 3189	Precursor_microRNA
TC1600010363.hg.1	7.4	10.5	-8.58	IRX3	iroquois homeobox 3	Multiple_Complex
TC1200007931.hg.1	7.04	10.14	-8.58	SLC16A7	solute carrier family 16 (monocarboxylate transporter), member 7	Multiple_Complex
TC0400010558.hg.1	5.73	8.82	-8.54	ATP8A1	ATPase, aminophospholipid transporter (APLT), class I, type 8A, member 1	Multiple_Complex
TC1600011257.hg.1	4.81	7.91	-8.52	SLC22A31	solute carrier family 22, member 31	Multiple_Complex
TC0600011733.hg.1	9.21	12.3	-8.48	KCNK5	potassium channel, two pore domain subfamily K, member 5	Multiple_Complex
TC0300008319.hg.1	6.37	9.46	-8.48			NonCoding
TC2200007505.hg.1	5.99	9.07	-8.44	2018-09-03	septin 3	Multiple_Complex
TC0400009048.hg.1	4.75	7.82	-8.41	TLR2	toll-like receptor 2	Multiple_Complex
TC0600012544.hg.1	10.54	13.6	-8.37	RRAGD	Ras-related GTP binding D	Multiple_Complex
TC0900008474.hg.1	6.91	9.97	-8.36	SNX30	sorting nexin family member 30	Multiple_Complex
TC1200009157.hg.1	4.4	7.46	-8.35	P2RX7	purinergic receptor P2X, ligand gated ion channel, 7	Multiple_Complex
TC0100014173.hg.1	7.3	10.36	-8.33	TTC39A	tetratricopeptide repeat domain 39A	Multiple_Complex
TC1700010967.hg.1	5.7	8.76	-8.29	PRR15L	proline rich 15-like	Coding
TC0100017029.hg.1	7.21	10.25	-8.23	PIK3C2B	phosphatidylinositol-4-phosphate 3-kinase, catalytic subunit type 2 beta	Multiple_Complex
TC0900012033.hg.1	5.6	8.65	-8.23	DPP7	dipeptidyl-peptidase 7	Multiple_Complex
TC1500009813.hg.1	4.62	7.66	-8.23	MEGF11	multiple EGF-like-domains 11	Multiple_Complex
TC0600011974.hg.1	4.21	7.25	-8.22	slaglawby	Transcript Identified by AceView	Unassigned
TC0100010543.hg.1	14.75	17.78	-8.16	ATP1B1	ATPase, Na+/K+ transporting, beta 1 polypeptide	Multiple_Complex
TC2000007202.hg.1	13.4	16.43	-8.16	ACSS2	acyl-CoA synthetase short-chain family member 2	Multiple_Complex
TC1000012536.hg.1	11.3	14.33	-8.15	MPP7	membrane protein, palmitoylated 7	Multiple_Complex
TC0100013225.hg.1	4.58	7.61	-8.14	klorlorbu	Transcript Identified by AceView	Coding
TC1300009158.hg.1	8.71	11.73	-8.12	LGMNP1	legumain pseudogene 1 [Source:HGNC Symbol;Acc:HGNC:23079]	Pseudogene
TC1500009709.hg.1	6.71	9.73	-8.08	CA12	carbonic anhydrase XII	Multiple_Complex
TC1500009089.hg.1	7.38	10.39	-8.06	PLCB2	phospholipase C, beta 2	Multiple_Complex
TC1000006891.hg.1	7.09	10.09	-8.04	VIM	vimentin	Multiple_Complex
TC0100018263.hg.1	7.47	10.47	-8	GSTM1	glutathione S-transferase mu 1	Multiple_Complex
TC0400011735.hg.1	6.61	9.61	-7.98	TNIP3	TNFAIP3 interacting protein 3	Multiple_Complex
TC0600012976.hg.1	5.81	8.8	-7.97	GPRC6A	G protein-coupled receptor, class C, group 6, member A	Coding
TC0200008977.hg.1	4.71	7.7	-7.97	kargoybu	Transcript Identified by AceView	Coding
TC1600009246.hg.1	7.93	10.93	-7.96	ROGDI	rogdi homolog	Multiple_Complex
TC0700011121.hg.1	4.45	7.44	-7.95			NonCoding
TC0100008075.hg.1	6.11	9.1	-7.94	ST3GAL3; MIR6079	ST3 beta-galactoside alpha-2,3-sialyltransferase 3; microRNA 6079	Multiple_Complex
TC0100014354.hg.1	3.9	6.89	-7.93	LOC105378753; RP4-794H19.1	uncharacterized LOC105378753; novel transcript	NonCoding
TC1600010316.hg.1	7.51	10.49	-7.91	TOX3	TOX high mobility group box family member 3	Multiple_Complex
TC1200008629.hg.1	13.91	16.89	-7.9	DRAM1	DNA-damage regulated autophagy modulator 1	Multiple_Complex
TC1500007520.hg.1	7.06	10.03	-7.86	APH1B	APH1B gamma secretase subunit	Multiple_Complex
TC0600014215.hg.1	7.23	10.21	-7.85	GMDS	GDP-mannose 4,6-dehydratase	Multiple_Complex
TC0300013751.hg.1	8.08	11.05	-7.84	BDH1	3-hydroxybutyrate dehydrogenase, type 1	Multiple_Complex
TC0100012490.hg.1	8.71	11.67	-7.78	C1orf233	chromosome 1 open reading frame 233	Multiple_Complex
TC0100015211.hg.1	11.42	14.38	-7.76	GSTM3	glutathione S-transferase mu 3 (brain)	Multiple_Complex
TC0400007232.hg.1	6.68	9.62	-7.72	C4orf19	chromosome 4 open reading frame 19	Coding
TC1000007271.hg.1	4.42	7.37	-7.71			NonCoding
TC1200011207.hg.1	13.91	16.85	-7.69	CPM	carboxypeptidase M	Multiple_Complex
TC2000006559.hg.1	12.37	15.3	-7.67	CDC25B	cell division cycle 25B	Multiple_Complex
TC22_KI270731v1_random00006432.hg.1	5.58	8.51	-7.61	GGT3P	Homo sapiens gamma-glutamyltransferase 3 pseudogene (GGT3P), non-coding RNA.	NonCoding
TC2000007203.hg.1	8.07	10.99	-7.56	reyzee	Transcript Identified by AceView	Coding
TC0400011279.hg.1	8.61	11.52	-7.54	ABCG2	ATP binding cassette subfamily G member 2 (Junior blood group)	Multiple_Complex
TC0800009311.hg.1	7.24	10.14	-7.48	RP11-585F1.6		Multiple_Complex
TC0600014316.hg.1	3.25	6.15	-7.47	FILIP1	filamin A interacting protein 1	Multiple_Complex
TC0200012713.hg.1	9.83	12.73	-7.46	BCL11A	B-cell CLL/lymphoma 11A (zinc finger protein)	Multiple_Complex
TC1500007060.hg.1	7.16	10.06	-7.46	MAP1A	microtubule associated protein 1A	Multiple_Complex
TC1000008372.hg.1	3.04	5.94	-7.45			NonCoding
TC1700010627.hg.1	4.75	7.64	-7.44	spoyslu	Transcript Identified by AceView	Coding
TC0500006558.hg.1	5.79	8.68	-7.42	C5orf38	chromosome 5 open reading frame 38	Multiple_Complex
TC0700007043.hg.1	3.47	6.36	-7.41	kluky	Transcript Identified by AceView	Unassigned
TC1200012295.hg.1	6.62	9.5	-7.4	RP11-214K3.22	novel transcript, sense intronic to CCDC92	NonCoding
TC0300011110.hg.1	3.45	6.33	-7.4	CACNA2D2	calcium channel, voltage-dependent, alpha 2/delta subunit 2	Multiple_Complex
TC0400008041.hg.1	10.04	12.92	-7.39	PTPN13	protein tyrosine phosphatase, non-receptor type 13 (APO-1/CD95 (Fas)-associated phosphatase)	Multiple_Complex
TC1300008592.hg.1	6.06	8.94	-7.37	LINC00457	long intergenic non-protein coding RNA 457	NonCoding
TC0900010969.hg.1	7.41	10.3	-7.36	CORO2A	coronin, actin binding protein, 2A	Multiple_Complex
TC0300011566.hg.1	4.94	7.81	-7.34	CNTN3	contactin 3 (plasmacytoma associated)	Multiple_Complex
TC0100013889.hg.1	4.53	7.4	-7.34	ZMYND12	zinc finger, MYND-type containing 12	Multiple_Complex
TC2000009951.hg.1	6.7	9.57	-7.33	MIR646HG	MIR646 host gene	NonCoding
TC0X00010849.hg.1	11.91	14.78	-7.32	GPC4	glypican 4	Multiple_Complex
TC0400008030.hg.1	8.41	11.28	-7.31	ARHGAP24	Rho GTPase activating protein 24	Multiple_Complex
TC2100008568.hg.1	8.86	11.73	-7.3	TMPRSS2	transmembrane protease, serine 2	Multiple_Complex
TC0600013017.hg.1	2.81	5.67	-7.28	jeyjer	Transcript Identified by AceView	Coding
TC0600011494.hg.1	5.21	8.07	-7.25			NonCoding
TC1500010869.hg.1	10.24	13.1	-7.23	CCPG1; MIR628	cell cycle progression 1; microRNA 628	Multiple_Complex
TC0500011751.hg.1	9.12	11.97	-7.21	FEM1C	fem-1 homolog c (C. elegans)	Multiple_Complex
TC0700012449.hg.1	4.1	6.94	-7.17	RNF148	ring finger protein 148	Coding
TC1200009884.hg.1	7	9.84	-7.16	LOC100506159; AC091814.2	uncharacterized LOC100506159; novel transcript	NonCoding
TC1500010864.hg.1	7.22	10.06	-7.14	GATM	glycine amidinotransferase (L-arginine:glycine amidinotransferase)	Multiple_Complex
TC0100015246.hg.1	4.51	7.35	-7.14	KCNA3	potassium channel, voltage gated shaker related subfamily A, member 3	Multiple_Complex
TC1100011310.hg.1	6.38	9.22	-7.13	PC	pyruvate carboxylase	Multiple_Complex
TC0700012443.hg.1	3.8	6.63	-7.12	FEZF1	FEZ family zinc finger 1	Coding
TC0500008351.hg.1	5.59	8.42	-7.11	boystorby; byflar	Transcript Identified by AceView	Multiple_Complex
TC0X00008881.hg.1	5.46	8.29	-7.09	SPRY3	sprouty RTK signaling antagonist 3	Coding
TC0Y00006855.hg.1	5.46	8.29	-7.09	SPRY3	Homo sapiens sprouty RTK signaling antagonist 3 (SPRY3), transcript variant 1, mRNA.; sprouty homolog 3 (Drosophila) [Source:HGNC Symbol;Acc:HGNC:11271]; Homo sapiens sprouty homolog 3 (Drosophila), mRNA (cDNA clone MGC:97072 IMAGE:7262284), complete cds.; Homo sapiens sprouty homolog 3 (Drosophila), mRNA (cDNA clone MGC:103904 IMAGE:30915293), complete cds.; Homo sapiens sprouty homolog 3 (Droso…	Coding
TSUnmapped00000263.hg.1	3.32	6.15	-7.09	BCL2L14	BCL2-like 14 (apoptosis facilitator)	NonCoding
TC0X00010532.hg.1	7.76	10.58	-7.06	AMOT; MIR4329	angiomotin; microRNA 4329	Multiple_Complex
TC0100014937.hg.1	7.56	10.38	-7.05	FAM69A	family with sequence similarity 69, member A	Coding
TC0200015307.hg.1	4.06	6.88	-7.05	DNAH7	dynein, axonemal, heavy chain 7	Multiple_Complex
TC0400012237.hg.1	3.12	5.94	-7.04	RP11-364P22.3	TEC	Unassigned
TC0200009005.hg.1	5.37	8.19	-7.03	DPP10	dipeptidyl-peptidase 10 (inactive)	Multiple_Complex
TC2200009312.hg.1	6.78	9.59	-7.02	GGT3P	gamma-glutamyltransferase 3 pseudogene	Multiple_Complex
TC1300006799.hg.1	4.66	7.47	-7.01	FRY	FRY microtubule binding protein	Multiple_Complex
TC0100009844.hg.1	8.33	11.13	-6.98	stukler	Transcript Identified by AceView	Coding
TC2000010005.hg.1	8.28	11.08	-6.98	MMP24-AS1	MMP24 antisense RNA 1	NonCoding
TC0300012924.hg.1	13.17	15.97	-6.97	VEPH1	ventricular zone expressed PH domain containing 1	Multiple_Complex
TC0400012081.hg.1	3.67	6.47	-6.97	gasnoyby	Transcript Identified by AceView	Unassigned
TC0300008467.hg.1	10.7	13.5	-6.96	ARHGAP31	Rho GTPase activating protein 31	Multiple_Complex
TC0100006725.hg.1	9.56	12.36	-6.95	PER3	period circadian clock 3	Multiple_Complex
TC0100018365.hg.1	3.47	6.27	-6.95	LOC101927787; RP4-781K5.4	uncharacterized LOC101927787; novel transcript	NonCoding
TC0100008336.hg.1	14.42	17.21	-6.94	SCP2	sterol carrier protein 2	Multiple_Complex
TC2000008499.hg.1	10.44	13.24	-6.94	RRBP1	ribosome binding protein 1	Multiple_Complex
TC2000009182.hg.1	3.91	6.71	-6.93	josabu	Transcript Identified by AceView	Coding
TC1700006996.hg.1	3.77	6.56	-6.92	AC015922.7		Multiple_Complex
TC0X00008794.hg.1	9.72	12.51	-6.9	SLC6A8	solute carrier family 6 (neurotransmitter transporter), member 8	Multiple_Complex
TC0200006473.hg.1	3.26	6.04	-6.87	zawdawbu	Transcript Identified by AceView	Multiple_Complex
TC0X00007655.hg.1	5.39	8.16	-6.85	SLC16A2	solute carrier family 16, member 2 (thyroid hormone transporter)	Multiple_Complex
TC1200009770.hg.1	4.02	6.79	-6.83	lageyby	Transcript Identified by AceView	Coding
TC1700012480.hg.1	5.4	8.17	-6.82	TNRC6C-AS1	TNRC6C antisense RNA 1	NonCoding
TC0900007517.hg.1	5.26	8.03	-6.82	C9orf135	chromosome 9 open reading frame 135	Multiple_Complex
TC0100013903.hg.1	8.26	11.03	-6.8	RP11-342M1.3	novel transcript, antisense to ERMAP	NonCoding
TC1900011398.hg.1	6.39	9.15	-6.78	TMC4	transmembrane channel like 4	Multiple_Complex
TC1900007836.hg.1	6.9	9.66	-6.77	FXYD3; MIR6887	FXYD domain containing ion transport regulator 3; microRNA 6887	Multiple_Complex
TC1100013040.hg.1	12.05	14.8	-6.76	TM7SF2	transmembrane 7 superfamily member 2	Multiple_Complex
TC0400011203.hg.1	9.64	12.4	-6.76	HPSE	heparanase	Multiple_Complex
TC0600007060.hg.1	9.13	11.89	-6.76	MYLIP; MIR4639	myosin regulatory light chain interacting protein; microRNA 4639	Multiple_Complex
TC1900008485.hg.1	4.06	6.82	-6.76	FUT2	fucosyltransferase 2 (secretor status included)	Multiple_Complex
TC0700006445.hg.1	3.13	5.89	-6.76	FAM20C	family with sequence similarity 20, member C	Multiple_Complex
TC0300013334.hg.1	11.94	14.69	-6.74	MCCC1	methylcrotonoyl-CoA carboxylase 1	Multiple_Complex
TC1400009697.hg.1	14.66	17.41	-6.72	NPC2; MIR4709	Niemann-Pick disease, type C2; microRNA 4709	Multiple_Complex
TC1600009868.hg.1	7.48	10.23	-6.72	SULT1A2	sulfotransferase family 1A member 2	Multiple_Complex
TC0100010458.hg.1	3.3	6.04	-6.71	zarorbo	Transcript Identified by AceView	Unassigned
TC0600006976.hg.1	6.53	9.27	-6.7	PHACTR1	phosphatase and actin regulator 1	Multiple_Complex
TC1100012921.hg.1	4.62	7.36	-6.7			NonCoding
TC0100017449.hg.1	9.76	12.5	-6.68	CAPN8	calpain 8	Multiple_Complex
TC0900011176.hg.1	6.12	8.86	-6.67	C9orf152	chromosome 9 open reading frame 152	Multiple_Complex
TC2000007224.hg.1	6.52	9.26	-6.66	SPAG4	sperm associated antigen 4	Multiple_Complex
TC1500008029.hg.1	12.16	14.89	-6.65	FAH	fumarylacetoacetate hydrolase (fumarylacetoacetase)	Multiple_Complex
TC0400006718.hg.1	8.54	11.27	-6.61	SORCS2	sortilin-related VPS10 domain containing receptor 2	Multiple_Complex
TC1500007701.hg.1	6.53	9.25	-6.61	DRAIC	downregulated RNA in cancer, inhibitor of cell invasion and migration	Multiple_Complex
TC0200011837.hg.1	9.27	11.99	-6.58	FAM49A	family with sequence similarity 49, member A	Multiple_Complex
TC2000009948.hg.1	6.94	9.66	-6.57	NPEPL1	aminopeptidase-like 1	Multiple_Complex
TC1500010541.hg.1	4.98	7.7	-6.57	RP11-4G2.1	novel transcript	NonCoding
TC1200007095.hg.1	8.83	11.54	-6.55	RP11-625L16.1	novel transcript	NonCoding
TC0900008847.hg.1	6.48	9.19	-6.54	LCN2	lipocalin 2	Multiple_Complex
TC0300013577.hg.1	4.31	7.02	-6.54	RP11-528A4.2	novel transcript	NonCoding
TC0900011192.hg.1	8.41	11.11	-6.52	LPAR1	lysophosphatidic acid receptor 1	Multiple_Complex
TC0200007803.hg.1	12.17	14.87	-6.51	LGALSL	lectin, galactoside-binding-like	Multiple_Complex
TC0200014764.hg.1	13.19	15.89	-6.5	DPP4	dipeptidyl-peptidase 4	Multiple_Complex
TC1000008357.hg.1	4.1	6.79	-6.46	smorsho	Transcript Identified by AceView	Unassigned
TC1600011235.hg.1	9.29	11.98	-6.43	GALNS	galactosamine (N-acetyl)-6-sulfatase	Multiple_Complex
TC0X00009929.hg.1	7.3	9.99	-6.43	OPHN1	oligophrenin 1	Multiple_Complex
TC0100010276.hg.1	4.86	7.54	-6.42	LINC01133	long intergenic non-protein coding RNA 1133	NonCoding
TC1400009992.hg.1	4.03	6.71	-6.42	FBLN5	fibulin 5	Multiple_Complex
TC1200008305.hg.1	7.21	9.88	-6.37	dorgly	Transcript Identified by AceView	Coding
TC0400011299.hg.1	6.68	9.34	-6.33	FAM13A	family with sequence similarity 13, member A	Multiple_Complex
TC0700010812.hg.1	3.66	6.32	-6.32	kuchoyby	Transcript Identified by AceView	Unassigned
TSUnmapped00000083.hg.1	2.56	5.22	-6.32	BCL2L14	BCL2-like 14 (apoptosis facilitator)	NonCoding
TC0100013302.hg.1	8.54	11.2	-6.31	GALE	UDP-galactose-4-epimerase	Multiple_Complex
TC0100009969.hg.1	3.27	5.92	-6.28	RIIAD1	regulatory subunit of type II PKA R-subunit (RIIa) domain containing 1	Multiple_Complex
TC0400009551.hg.1	4.03	6.68	-6.27	F11	coagulation factor XI	Multiple_Complex
TC1200011327.hg.1	12.24	14.88	-6.24	CSRP2	cysteine and glycine-rich protein 2	Multiple_Complex
TC0100015493.hg.1	7.28	9.92	-6.24	CH17-472G23.4		Pseudogene
TC1200009558.hg.1	9.66	12.3	-6.23	NINJ2	ninjurin 2	Multiple_Complex
TC0600013007.hg.1	6.83	9.46	-6.23	FAM184A	family with sequence similarity 184, member A	Multiple_Complex
TC0800010631.hg.1	5.26	7.9	-6.22	TTPA	tocopherol (alpha) transfer protein	Multiple_Complex
TC0X00010559.hg.1	6.99	9.62	-6.2	LRCH2	leucine-rich repeats and calponin homology (CH) domain containing 2	Multiple_Complex
TC0X00007539.hg.1	2.66	5.29	-6.2	GDPD2	glycerophosphodiester phosphodiesterase domain containing 2	Multiple_Complex
TC0X00008200.hg.1	6.21	8.84	-6.19	ASS1P5	argininosuccinate synthetase 1 pseudogene 5 [Source:HGNC Symbol;Acc:HGNC:768]	Pseudogene
TC1000011005.hg.1	11.32	13.95	-6.18	P4HA1	prolyl 4-hydroxylase, alpha polypeptide I	Multiple_Complex
TC1900011741.hg.1	11.07	13.7	-6.18	CEACAM5	carcinoembryonic antigen-related cell adhesion molecule 5	Multiple_Complex
TC0200007296.hg.1	10.6	13.23	-6.18	GALM	galactose mutarotase (aldose 1-epimerase)	Multiple_Complex
TC1300010043.hg.1	3.66	6.28	-6.17	PCDH20	protocadherin 20	Coding
TC0200014728.hg.1	12.59	15.21	-6.15	LY75-CD302; CD302; LY75	LY75-CD302 readthrough; CD302 molecule; lymphocyte antigen 75	Multiple_Complex
TC0X00010373.hg.1	6.54	9.15	-6.12	RP1-232L22__B.1		Multiple_Complex
TC0900008955.hg.1	8	10.61	-6.1			NonCoding
TC0500008989.hg.1	4.31	6.92	-6.1	ASS1P10	argininosuccinate synthetase 1 pseudogene 10 [Source:HGNC Symbol;Acc:HGNC:760]	Pseudogene
TC1200011217.hg.1	3.26	5.87	-6.08	RP11-1143G9.5	novel transcript	NonCoding
TC1100006854.hg.1	3.38	5.98	-6.07	RP11-483L5.1; joymer	Transcript Identified by AceView; novel transcript	Multiple_Complex
TC2000008895.hg.1	9.8	12.4	-6.06	PXMP4	peroxisomal membrane protein 4	Multiple_Complex
TC0200008462.hg.1	7.18	9.78	-6.06	PROM2	prominin 2	Multiple_Complex
TC0100017494.hg.1	5.81	8.41	-6.05	yokoyo	Transcript Identified by AceView	Unassigned
TC0100012232.hg.1	11.17	13.75	-5.98	COX20	COX20 cytochrome c oxidase assembly factor	Multiple_Complex
TC0100018510.hg.1	11.27	13.85	-5.97	GLMP	glycosylated lysosomal membrane protein	Multiple_Complex
TC1200008900.hg.1	10.83	13.4	-5.97	ERP29	endoplasmic reticulum protein 29	Multiple_Complex
TC0100017446.hg.1	8.57	11.15	-5.97	SUSD4	sushi domain containing 4	Multiple_Complex
TC1300006594.hg.1	7.34	9.91	-5.94	TNFRSF19	tumor necrosis factor receptor superfamily, member 19	Multiple_Complex
TC1000012480.hg.1	3.12	5.69	-5.94	CYP2C18	cytochrome P450, family 2, subfamily C, polypeptide 18	Coding
TC0100010454.hg.1	12.97	15.54	-5.92	MGST3	microsomal glutathione S-transferase 3	Multiple_Complex
TC0100006604.hg.1	6.42	8.98	-5.89	PRDM16	PR domain containing 16	Multiple_Complex
TC1300008468.hg.1	7.26	9.82	-5.88	SLC46A3	solute carrier family 46, member 3	Multiple_Complex
TC0X00007240.hg.1	8.23	10.78	-5.84	CLCN5	chloride channel, voltage-sensitive 5	Multiple_Complex
TC0600009836.hg.1	8.83	11.37	-5.82	IYD	iodotyrosine deiodinase	Multiple_Complex
TC1700011121.hg.1	14.05	16.59	-5.81	TOB1	transducer of ERBB2, 1	Multiple_Complex
TC1000008974.hg.1	6.54	9.08	-5.81	VWA2	von Willebrand factor A domain containing 2	Multiple_Complex
TC0300007051.hg.1	6.05	8.59	-5.81	ITGA9	integrin alpha 9	Multiple_Complex
TC0100016973.hg.1	10.39	12.92	-5.79	CYB5R1	cytochrome b5 reductase 1	Multiple_Complex
TC2200009234.hg.1	5	7.54	-5.79	SPECC1L-ADORA2A	SPECC1L-ADORA2A readthrough (NMD candidate)	Multiple_Complex
TC1100012976.hg.1	11.07	13.59	-5.76	NUCB2	nucleobindin 2	Multiple_Complex
TC0700008574.hg.1	5.89	8.41	-5.75	MUC3A	mucin 3A, cell surface associated	Multiple_Complex
TC0100012745.hg.1	3.09	5.62	-5.75			NonCoding
TC1100013222.hg.1	7.42	9.94	-5.74	CARD16	caspase recruitment domain family, member 16	Multiple_Complex
TC1200008551.hg.1	4.7	7.22	-5.74	RMST	rhabdomyosarcoma 2 associated transcript (non-protein coding)	NonCoding
TC1700012209.hg.1	8.26	10.77	-5.73	SLC47A1	solute carrier family 47 (multidrug and toxin extrusion), member 1	Multiple_Complex
TC0700009088.hg.1	4.05	6.57	-5.72	skorblawby	Transcript Identified by AceView	Unassigned
TC0700007237.hg.1	7.08	9.59	-5.71	jawku	Transcript Identified by AceView	Unassigned
TC1200007847.hg.1	5.72	8.23	-5.71	HSD17B6	hydroxysteroid (17-beta) dehydrogenase 6	Multiple_Complex
TC0500012392.hg.1	4.33	6.84	-5.69	SPINK1	serine peptidase inhibitor, Kazal type 1	Multiple_Complex
TC2000008731.hg.1	5.38	7.89	-5.68	LOC101926889	uncharacterized LOC101926889	NonCoding
TC1000010925.hg.1	5.58	8.08	-5.67	PRF1	perforin 1 (pore forming protein)	Multiple_Complex
TC0600011463.hg.1	11.9	14.4	-5.66	NEU1	sialidase 1 (lysosomal sialidase)	Multiple_Complex
TC0800009961.hg.1	10.64	13.14	-5.66	CLU; MIR6843	clusterin; microRNA 6843	Multiple_Complex
TC0500006643.hg.1	7.34	9.84	-5.66	LINC01018	long intergenic non-protein coding RNA 1018	NonCoding
TC0600013962.hg.1	5.82	8.32	-5.66	DACT2	dishevelled-binding antagonist of beta-catenin 2	Multiple_Complex
TC1000007862.hg.1	10.76	13.25	-5.62	COX20P1	COX20 cytochrome c oxidase assembly factor pseudogene 1	Multiple_Complex
TC0400012078.hg.1	11.07	13.56	-5.61	NR3C2	nuclear receptor subfamily 3, group C, member 2	Multiple_Complex
TC0700013067.hg.1	7.21	9.7	-5.59	SMARCD3	SWI/SNF related, matrix associated, actin dependent regulator of chromatin, subfamily d, member 3	Multiple_Complex
TC0100018491.hg.1	5.27	7.75	-5.59	RORC	RAR-related orphan receptor C	Multiple_Complex
TC0100017137.hg.1	4.53	7.01	-5.59	MIR29B2; MIR29C	microRNA 29b-2; microRNA 29c	Multiple_Complex
TC0100014228.hg.1	10.34	12.82	-5.58	LRP8	LDL receptor related protein 8	Multiple_Complex
TC0100011091.hg.1	9.13	11.6	-5.55	C1orf53	chromosome 1 open reading frame 53	Multiple_Complex
TC0400012778.hg.1	6.42	8.89	-5.55	SOD3	superoxide dismutase 3, extracellular	Coding
TC1200011959.hg.1	5.53	8.01	-5.55			NonCoding
TC0900010289.hg.1	9.54	12.01	-5.53	RP11-327I22.8		NonCoding
TC0300011124.hg.1	8.06	10.53	-5.53	CISH	cytokine inducible SH2-containing protein	Multiple_Complex
TC0800010926.hg.1	10.49	12.95	-5.52	PAG1	phosphoprotein membrane anchor with glycosphingolipid microdomains 1	Multiple_Complex
TC0100013305.hg.1	11	13.46	-5.5	FUCA1	fucosidase, alpha-L- 1, tissue	Coding
TC1400010012.hg.1	14.58	17.03	-5.49	LGMN	legumain	Multiple_Complex
TC1100010730.hg.1	8	10.46	-5.49	ACP2	acid phosphatase 2, lysosomal	Multiple_Complex
TC0200010992.hg.1	3.58	6.04	-5.49			NonCoding
TSUnmapped00000746.hg.1	9.21	11.67	-5.48	SCG5	secretogranin V	Coding
TC0500013282.hg.1	7.02	9.48	-5.48	ZDHHC11	zinc finger, DHHC-type containing 11	Multiple_Complex
TC0200011624.hg.1	6.99	9.44	-5.46	CMPK2	cytidine monophosphate (UMP-CMP) kinase 2, mitochondrial	Multiple_Complex
TC1100012131.hg.1	5.68	8.13	-5.46	MMP1	matrix metallopeptidase 1	Multiple_Complex
TC1700012155.hg.1	2.77	5.21	-5.45	ZNF750	zinc finger protein 750	Coding
TC0200008666.hg.1	8.87	11.32	-5.44	IL1R1	interleukin 1 receptor, type I	Multiple_Complex
TC1100009187.hg.1	4.04	6.49	-5.44	RP11-728F11.4; zerna	novel transcript, anisense to FXYD6; Transcript Identified by AceView	Multiple_Complex
TC0500008940.hg.1	3.68	6.12	-5.44	LOC101926975; AC005592.1	uncharacterized LOC101926975; novel transcript	NonCoding
TC0700009317.hg.1	13.23	15.67	-5.43	TRIM24	tripartite motif containing 24	Multiple_Complex
TC0100017079.hg.1	12.53	14.96	-5.42	SLC41A1	solute carrier family 41 (magnesium transporter), member 1	Multiple_Complex
TC1200009768.hg.1	13.09	15.53	-5.41	LPCAT3	lysophosphatidylcholine acyltransferase 3	Multiple_Complex
TC1900011112.hg.1	10.78	13.21	-5.4	AC026803.1		Precursor_microRNA
TC0500011497.hg.1	9.5	11.93	-5.4	GLRX	glutaredoxin	Multiple_Complex
TC1600009870.hg.1	7.35	9.78	-5.39	SULT1A1	sulfotransferase family 1A member 1	Multiple_Complex
TC1100013174.hg.1	10.6	13.03	-5.38	BSCL2	Berardinelli-Seip congenital lipodystrophy 2 (seipin)	Multiple_Complex
TC1100006598.hg.1	6.91	9.34	-5.37	SLC22A18	solute carrier family 22, member 18	Multiple_Complex
TC0500010924.hg.1	4.84	7.27	-5.37	ADAMTS6	ADAM metallopeptidase with thrombospondin type 1 motif 6	Multiple_Complex
TC1700012183.hg.1	3.82	6.25	-5.37	FGF11	fibroblast growth factor 11	Multiple_Complex
TC1200010642.hg.1	3.63	6.06	-5.36	FAIM2	Fas apoptotic inhibitory molecule 2	Coding
TC1900007115.hg.1	12.66	15.08	-5.35	NFIX	nuclear factor I/X (CCAAT-binding transcription factor)	Multiple_Complex
TC0400012782.hg.1	12.15	14.57	-5.34	STIM2	stromal interaction molecule 2	Multiple_Complex
TC0700008306.hg.1	9.83	12.25	-5.34	FZD1	frizzled class receptor 1	Coding
TC0400007542.hg.1	5.3	7.71	-5.32	KIT	v-kit Hardy-Zuckerman 4 feline sarcoma viral oncogene homolog	Multiple_Complex
TC2000008760.hg.1	5.76	8.17	-5.31	CFTRP1	cystic fibrosis transmembrane conductance regulator pseudogene 1 [Source:HGNC Symbol;Acc:HGNC:16182]	Multiple_Complex
TC0700012165.hg.1	5.76	8.16	-5.31	ATXN7L1	ataxin 7-like 1	Multiple_Complex
TC0100015958.hg.1	3.71	6.12	-5.31	blorrerbo	Transcript Identified by AceView	Coding
TC1000009863.hg.1	9.31	11.72	-5.3	FAM107B	family with sequence similarity 107, member B	Multiple_Complex
TC0100015193.hg.1	4.39	6.8	-5.3	MYBPHL	myosin binding protein H-like	Multiple_Complex
TC1200011567.hg.1	6.19	8.59	-5.27	TMCC3; MIR7844	transmembrane and coiled-coil domain family 3; microRNA 7844	Multiple_Complex
TC0100018008.hg.1	3.63	6.03	-5.27			NonCoding
TC1100013129.hg.1	14.85	17.24	-5.26	CTSD	cathepsin D	Multiple_Complex
TC1100009846.hg.1	6.02	8.41	-5.25			NonCoding
TC1700009910.hg.1	6.78	9.17	-5.23	KRT16P2	keratin 16 pseudogene 2	Multiple_Complex
TC1200011711.hg.1	10.44	12.82	-5.22	GNPTAB	N-acetylglucosamine-1-phosphate transferase, alpha and beta subunits	Multiple_Complex
TC1000010139.hg.1	4.72	7.1	-5.22	MIR8086	microRNA 8086	Precursor_microRNA
TC0300007657.hg.1	11.06	13.44	-5.21	C3orf14	chromosome 3 open reading frame 14	Multiple_Complex
TC0900008441.hg.1	8.14	10.52	-5.2	UGCG	UDP-glucose ceramide glucosyltransferase	Multiple_Complex
TC0200006936.hg.1	6.76	9.14	-5.2	KLHL29	kelch-like family member 29	Multiple_Complex
TC1700008555.hg.1	5.97	8.35	-5.2	RP11-269G24.7		Pseudogene
TC1200011108.hg.1	10.76	13.13	-5.17	WIF1	WNT inhibitory factor 1	Coding
TC0700007048.hg.1	5.49	7.86	-5.17	kloky	Transcript Identified by AceView	Coding
TC0X00007504.hg.1	4.15	6.52	-5.17	STARD8	StAR-related lipid transfer domain containing 8	Multiple_Complex
TC0100017800.hg.1	3.17	5.54	-5.17			NonCoding
TC1100009016.hg.1	7.98	10.35	-5.16	COLCA2	colorectal cancer associated 2	Coding
TC1200009421.hg.1	4.41	6.78	-5.16	bargeeby	Transcript Identified by AceView	Coding
TC1200007891.hg.1	7.74	10.11	-5.14	DTX3	deltex 3, E3 ubiquitin ligase	Multiple_Complex
TC0900010866.hg.1	11.75	14.1	-5.12	FBP1	fructose-1,6-bisphosphatase 1	Multiple_Complex
TC1500007062.hg.1	11.22	13.58	-5.11	CKMT1B; CKMT1A	creatine kinase, mitochondrial 1B; creatine kinase, mitochondrial 1A	Multiple_Complex
TC0X00009245.hg.1	7.29	9.64	-5.11			NonCoding
TC0600009548.hg.1	3.15	5.5	-5.11	numara	Transcript Identified by AceView	Coding
TC0X00007673.hg.1	4.21	6.55	-5.08			NonCoding
TC0900007593.hg.1	4.84	7.18	-5.07	RORB	RAR-related orphan receptor B	Coding
TC0500010835.hg.1	10.9	13.24	-5.06	PLK2	polo-like kinase 2	Multiple_Complex
TC1700008549.hg.1	9.16	11.5	-5.05	TANC2	tetratricopeptide repeat, ankyrin repeat and coiled-coil containing 2	Multiple_Complex
TC0100016018.hg.1	14.41	16.75	-5.04	CRABP2	cellular retinoic acid binding protein 2	Coding
TC0100017145.hg.1	8.03	10.36	-5.03	PLXNA2	plexin A2	Multiple_Complex
TC0600011734.hg.1	5.76	8.09	-5.03	glogloby	Transcript Identified by AceView	Coding
TC1200011958.hg.1	5.2	7.53	-5.03			NonCoding
TC0600009077.hg.1	4.64	6.97	-5.03	RP11-787I22.3	novel transcript antisense to SESN1	NonCoding
TC2000008072.hg.1	12.7	15.03	-5.02	PPDPF	pancreatic progenitor cell differentiation and proliferation factor	Multiple_Complex
TC0200013278.hg.1	11.73	14.06	-5.02	GGCX	gamma-glutamyl carboxylase	Multiple_Complex
TC1800006715.hg.1	11.08	13.4	-4.99	IMPA2	inositol(myo)-1(or 4)-monophosphatase 2	Multiple_Complex
TC1600009677.hg.1	5.88	8.2	-4.99	CRYM	crystallin mu	Multiple_Complex
TC0100015417.hg.1	6	8.31	-4.98	VTCN1	V-set domain containing T cell activation inhibitor 1	Multiple_Complex
TC1200012297.hg.1	5.77	8.09	-4.98	RP11-214K3.20	novel transcript, sense intronic to CCDC92	NonCoding
TSUnmapped00000669.hg.1	9.51	11.83	-4.97	SCG5	secretogranin V	Coding
TC1900007293.hg.1	5.36	7.67	-4.97	CTD-2538G9.3		Multiple_Complex
TC0700013338.hg.1	10.7	13.01	-4.96	GLCCI1	glucocorticoid induced 1	Multiple_Complex
TC0800008674.hg.1	6.37	8.68	-4.96	DEPTOR	DEP domain containing MTOR-interacting protein	Multiple_Complex
TC0200015710.hg.1	4.35	6.67	-4.96	flagarbu	Transcript Identified by AceView	Coding
TC0600007711.hg.1	9.6	11.91	-4.95	ITPR3	inositol 1,4,5-trisphosphate receptor, type 3	Multiple_Complex
TC1200012298.hg.1	6.65	8.95	-4.95	RP11-214K3.19	novel transcript, sense intronic to CCDC92	NonCoding
TC0200015707.hg.1	3.77	6.07	-4.95	klorklu	Transcript Identified by AceView	Unassigned
TC0200007048.hg.1	7.98	10.28	-4.93	MAPRE3	microtubule-associated protein, RP/EB family, member 3	Multiple_Complex
TC0900006741.hg.1	5.13	7.43	-4.93	SH3GL2	SH3-domain GRB2-like 2	Multiple_Complex
TC0X00008911.hg.1	3.31	5.61	-4.93	P2RY8	purinergic receptor P2Y, G-protein coupled, 8	Multiple_Complex
TC0Y00006887.hg.1	3.31	5.61	-4.93	P2RY8	Homo sapiens purinergic receptor P2Y, G-protein coupled, 8 (P2RY8), mRNA.; purinergic receptor P2Y, G-protein coupled, 8 [Source:HGNC Symbol;Acc:HGNC:15524]; Homo sapiens purinergic receptor P2Y, G-protein coupled, 8, mRNA (cDNA clone MGC:50878 IMAGE:5787268), complete cds.	Multiple_Complex
TC0800007086.hg.1	10.83	13.13	-4.92	DPYSL2	dihydropyrimidinase-like 2	Multiple_Complex
TSUnmapped00000812.hg.1	3.4	5.69	-4.92	BCL2L14	BCL2-like 14 (apoptosis facilitator)	NonCoding
TC0600014360.hg.1	11.8	14.1	-4.91	IPCEF1	interaction protein for cytohesin exchange factors 1	Multiple_Complex
TC1900009073.hg.1	9.07	11.37	-4.91			NonCoding
TC0800007114.hg.1	8.3	10.59	-4.91	SCARA3	scavenger receptor class A, member 3	Multiple_Complex
TC0800007382.hg.1	5.67	7.97	-4.91	IDO1	indoleamine 2,3-dioxygenase 1	Multiple_Complex
TC1200006862.hg.1	6.38	8.67	-4.89	BCL2L14	BCL2-like 14 (apoptosis facilitator)	Multiple_Complex
TC0100010887.hg.1	8.4	10.68	-4.88	C1orf21	chromosome 1 open reading frame 21	Multiple_Complex
TC1900009465.hg.1	4.77	7.05	-4.87	norwa	Transcript Identified by AceView	Coding
TC1700011436.hg.1	8.93	11.21	-4.86	ERN1	endoplasmic reticulum to nucleus signaling 1	Multiple_Complex
TC0900007491.hg.1	3.44	5.72	-4.84	yamimu	Transcript Identified by AceView	Coding
TC0800008678.hg.1	3.58	5.86	-4.83	RP11-760H22.2; flaly	Transcript Identified by AceView; putative novel transcript	NonCoding
TC0800012087.hg.1	10.74	13.01	-4.82	LYNX1	Ly6/neurotoxin 1	Multiple_Complex
TC0200006757.hg.1	3.68	5.95	-4.82	TRIB2	tribbles pseudokinase 2	Multiple_Complex
TC0300011360.hg.1	9.88	12.15	-4.81	PTPRG-AS1	PTPRG antisense RNA 1	NonCoding
TC0600012053.hg.1	3.57	5.83	-4.81	GSTA1	glutathione S-transferase alpha 1	Multiple_Complex
TC0800007110.hg.1	5.95	8.22	-4.8	EPHX2	epoxide hydrolase 2, cytoplasmic	Multiple_Complex
TC1300009629.hg.1	5.21	7.47	-4.8			NonCoding
TC1400008606.hg.1	15.55	17.81	-4.79	RNASE1	ribonuclease, RNase A family, 1 (pancreatic)	Multiple_Complex
TC0300014074.hg.1	9.22	11.48	-4.78	IFT80	intraflagellar transport 80	Multiple_Complex
TC0300008471.hg.1	6.39	8.65	-4.78			NonCoding
TC2000006567.hg.1	14.14	16.39	-4.77	FTLP3	ferritin, light polypeptide pseudogene 3 [Source:HGNC Symbol;Acc:HGNC:4000]	Pseudogene
TC0200011551.hg.1	11.29	13.55	-4.77	ADI1	acireductone dioxygenase 1	Multiple_Complex
TC0100015271.hg.1	6.58	8.83	-4.77	OVGP1	oviductal glycoprotein 1	Multiple_Complex
TC0100006954.hg.1	6.55	8.8	-4.77	KAZN	kazrin, periplakin interacting protein	Multiple_Complex
TC1600010075.hg.1	10.42	12.67	-4.76	SLC6A10P	solute carrier family 6 (neurotransmitter transporter), member 10, pseudogene	Multiple_Complex
TC1600007113.hg.1	11.41	13.65	-4.74	C16orf62	chromosome 16 open reading frame 62	Multiple_Complex
TC0700012230.hg.1	10.28	12.52	-4.74	NRCAM	neuronal cell adhesion molecule	Multiple_Complex
TC0100018261.hg.1	8.93	11.18	-4.74	GSTM4	glutathione S-transferase mu 4	Multiple_Complex
TC0300013970.hg.1	6.5	8.75	-4.74	PFKFB4; MIR6823	6-phosphofructo-2-kinase/fructose-2,6-biphosphatase 4; microRNA 6823	Multiple_Complex
TC0400007803.hg.1	5.57	7.81	-4.74	nokime	Transcript Identified by AceView	Coding
TC1000012505.hg.1	4.76	7	-4.74	LHPP	phospholysine phosphohistidine inorganic pyrophosphate phosphatase	Multiple_Complex
TC0900007238.hg.1	10.06	12.3	-4.73			NonCoding
TC0400012648.hg.1	3.29	5.53	-4.73	Y_RNA	Y RNA [Source:RFAM;Acc:RF00019]	NonCoding
TC0200008627.hg.1	12.93	15.17	-4.72	NPAS2	neuronal PAS domain protein 2	Multiple_Complex
TC1700011495.hg.1	11.82	14.05	-4.72	APOH	apolipoprotein H (beta-2-glycoprotein I)	Multiple_Complex
TC0600008466.hg.1	6.76	9	-4.72	EVADR; RP11-462G2.1	uncharacterized LOC101928353; novel transcript	NonCoding
TC0600008170.hg.1	2.99	5.23	-4.71	teyume	Transcript Identified by AceView	Coding
TC0100011770.hg.1	15.51	17.74	-4.7	EPHX1	epoxide hydrolase 1, microsomal (xenobiotic)	Multiple_Complex
TC0500008568.hg.1	10.53	12.76	-4.7	SLC12A2	solute carrier family 12 (sodium/potassium/chloride transporter), member 2	Multiple_Complex
TC1000011368.hg.1	10.24	12.48	-4.7	ANKRD22	ankyrin repeat domain 22	Multiple_Complex
TC0100018553.hg.1	8.92	11.16	-4.7	PLEKHA6	pleckstrin homology domain containing, family A member 6	Multiple_Complex
TC0900007299.hg.1	11.46	13.69	-4.69	ADGRF5P2	adhesion G protein-coupled receptor F5 pseudogene 2 [Source:HGNC Symbol;Acc:HGNC:32921]	Multiple_Complex
TC1000008207.hg.1	3.33	5.56	-4.69	moyklabu	Transcript Identified by AceView	NonCoding
TC1200012664.hg.1	7.31	9.53	-4.68	MYRFL	myelin regulatory factor-like	Multiple_Complex
TC0100009159.hg.1	3.47	5.69	-4.68	bazerbo	Transcript Identified by AceView	Unassigned
TC1700009236.hg.1	7.39	9.61	-4.67	SLC16A3; MIR6787	solute carrier family 16 (monocarboxylate transporter), member 3; microRNA 6787	Multiple_Complex
TC0900009259.hg.1	5.75	7.98	-4.67	UAP1L1	UDP-N-acetylglucosamine pyrophosphorylase 1 like 1	Multiple_Complex
TC1400006696.hg.1	7.83	10.05	-4.66			NonCoding
TC0500012299.hg.1	5.04	7.26	-4.66	PCDH12	protocadherin 12	Multiple_Complex
TC1700009516.hg.1	4.28	6.5	-4.66	GGT6	gamma-glutamyltransferase 6	Multiple_Complex
TC1200009891.hg.1	11.57	13.79	-4.65	CLEC7A	C-type lectin domain family 7, member A	Multiple_Complex
TC1200011392.hg.1	5.51	7.73	-4.65			NonCoding
TC1400010776.hg.1	4.32	6.54	-4.65	CATSPERB	catsper channel auxiliary subunit beta	Multiple_Complex
TC1000012050.hg.1	8.8	11.01	-4.63	FGFR2	fibroblast growth factor receptor 2	Multiple_Complex
TC0200007767.hg.1	4.35	6.56	-4.63	sherkubu	Transcript Identified by AceView	Unassigned
TC0200015815.hg.1	8.73	10.93	-4.62	EPHA4	EPH receptor A4	Multiple_Complex
TC0100011664.hg.1	7.77	9.98	-4.62	2018-03-02	mitochondrial amidoxime reducing component 2	Multiple_Complex
TC0700007717.hg.1	6.46	8.66	-4.62	RP11-373D7.1		Multiple_Complex
TC1000007890.hg.1	6.38	8.59	-4.62	HKDC1	hexokinase domain containing 1	Multiple_Complex
TC0600014272.hg.1	5.46	7.67	-4.62	HLA-DRB6	major histocompatibility complex, class II, DR beta 6 (pseudogene)	Multiple_Complex
TC0900008243.hg.1	10.13	12.34	-4.61	PLPPR1	phospholipid phosphatase related 1	Multiple_Complex
TC0100016678.hg.1	8.91	11.11	-4.6	FAM129A	family with sequence similarity 129, member A	Multiple_Complex
TC0800006975.hg.1	5.51	7.71	-4.6	BMP1	bone morphogenetic protein 1	Multiple_Complex
TC0100014250.hg.1	13.92	16.12	-4.59	TMEM59	transmembrane protein 59	Multiple_Complex
TC0900012245.hg.1	10.05	12.25	-4.59	ALDH1A1	aldehyde dehydrogenase 1 family, member A1	Multiple_Complex
TC0200009049.hg.1	11.6	13.79	-4.57	INSIG2	insulin induced gene 2	Multiple_Complex
TC0300013972.hg.1	7.84	10.04	-4.57	SLC26A6; MIR6824	solute carrier family 26 (anion exchanger), member 6; microRNA 6824	Multiple_Complex
TC1200011251.hg.1	5.89	8.08	-4.57	TSPAN8	tetraspanin 8	Multiple_Complex
TC0100011692.hg.1	10.97	13.16	-4.56	MIA3	melanoma inhibitory activity family, member 3	Multiple_Complex
TC0500009867.hg.1	8.8	10.98	-4.56	gleefler	Transcript Identified by AceView	Coding
TC1700006627.hg.1	4.33	6.51	-4.55	SPNS2	spinster homolog 2 (Drosophila)	Multiple_Complex
TC0800010993.hg.1	3.2	5.38	-4.55	CA3-AS1	CA3 antisense RNA 1	NonCoding
TC0100013076.hg.1	5.89	8.07	-4.54	PADI2	peptidyl arginine deiminase, type II	Multiple_Complex
TC0200014750.hg.1	3.58	5.75	-4.53	dornorbo	Transcript Identified by AceView	Unassigned
TC0600011956.hg.1	14.32	16.5	-4.52	ADGRF5	adhesion G protein-coupled receptor F5	Multiple_Complex
TC0200012404.hg.1	11.73	13.91	-4.52	ZFP36L2	ZFP36 ring finger protein-like 2	Multiple_Complex
TC0100008054.hg.1	7.34	9.51	-4.52	TMEM125	transmembrane protein 125	Multiple_Complex
TC1100007258.hg.1	5.62	7.8	-4.52	wuflorbu	Transcript Identified by AceView	Unassigned
TC0600012050.hg.1	5.45	7.62	-4.52	GSTA2	glutathione S-transferase alpha 2	Coding
TC1400009402.hg.1	4.9	7.07	-4.52	ESR2	estrogen receptor 2 (ER beta)	Multiple_Complex
TC0800007803.hg.1	4.29	6.47	-4.52	UG0898H09; RP11-659E9.6	uncharacterized LOC643763; novel transcript; uncharacterized LOC643763 [Source:EntrezGene;Acc:643763]	NonCoding
TC0900011300.hg.1	10.43	12.61	-4.51	TNFSF15	tumor necrosis factor (ligand) superfamily, member 15	Coding
TC0400007233.hg.1	4.33	6.5	-4.51	shygo	Transcript Identified by AceView	Unassigned
TC1200011385.hg.1	9.21	11.38	-4.5	LIN7A	lin-7 homolog A (C. elegans)	Multiple_Complex
TC0600009165.hg.1	7.43	9.59	-4.5			NonCoding
TC2100008161.hg.1	3.75	5.92	-4.5			NonCoding
TC0400009033.hg.1	9.46	11.62	-4.49	TRIM2	tripartite motif containing 2	Multiple_Complex
TC0X00010369.hg.1	7.45	9.61	-4.49	ARMCX2	armadillo repeat containing, X-linked 2	Multiple_Complex
TC1900011664.hg.1	4.82	6.99	-4.49	CCDC159	coiled-coil domain containing 159	Multiple_Complex
TC0600007664.hg.1	4.66	6.82	-4.48	HLA-DQA2	major histocompatibility complex, class II, DQ alpha 2	Coding
TC1900009405.hg.1	4.49	6.65	-4.48	FUT3	fucosyltransferase 3 (galactoside 3(4)-L-fucosyltransferase, Lewis blood group)	Multiple_Complex
TC1500009185.hg.1	11.85	14.01	-4.47	TMEM87A	transmembrane protein 87A	Multiple_Complex
TC0300010578.hg.1	5.35	7.51	-4.47			NonCoding
TC1400008714.hg.1	11.41	13.56	-4.44	SLC22A17	solute carrier family 22, member 17	Multiple_Complex
TC0600010078.hg.1	8.02	10.17	-4.44	SLC22A3	solute carrier family 22 (organic cation transporter), member 3	Multiple_Complex
TC0600014081.hg.1	5.21	7.35	-4.44	HFE	hemochromatosis	Multiple_Complex
TC1500009881.hg.1	3.79	5.93	-4.43	RP11-352D13.6	novel transcript, antisense to PAQR5	NonCoding
TC0100013279.hg.1	6.19	8.33	-4.42			NonCoding
TC0400010609.hg.1	4.97	7.11	-4.42	CORIN	corin, serine peptidase	Multiple_Complex
TC0700006674.hg.1	3.29	5.43	-4.41	slagluby	Transcript Identified by AceView	Unassigned
TC0700013538.hg.1	3.25	5.39	-4.41	TRGJ1; TRGC2; TRGJ2; TRGV9; TRGC1; TRGJP; TRGJP2	T cell receptor gamma joining 1; T cell receptor gamma constant 2; T cell receptor gamma joining 2; T cell receptor gamma variable 9; T cell receptor gamma constant 1; T cell receptor gamma joining P; T cell receptor gamma joining P2	Multiple_Complex
TC1200012698.hg.1	10.63	12.77	-4.4	CHPT1	choline phosphotransferase 1	Multiple_Complex
TC0800011305.hg.1	6.48	8.62	-4.4	NCALD	neurocalcin delta	Multiple_Complex
TC1100008964.hg.1	4.63	6.77	-4.4	RP11-382M14.1		Pseudogene
TC0800010511.hg.1	7.34	9.47	-4.39	SDR16C5	short chain dehydrogenase/reductase family 16C, member 5	Coding
TC0100014669.hg.1	5.34	7.47	-4.39			NonCoding
TC0700012734.hg.1	11.1	13.23	-4.38	CREB3L2	cAMP responsive element binding protein 3-like 2	Multiple_Complex
TC0700010604.hg.1	11.04	13.18	-4.38	CPVL	carboxypeptidase, vitellogenic-like	Multiple_Complex
TC2200007938.hg.1	5.43	7.56	-4.38	XXbac-B33L19.10		Pseudogene
TC0100017022.hg.1	4.97	7.1	-4.38	GOLT1A	golgi transport 1A	Multiple_Complex
TC0800010308.hg.1	2.43	4.56	-4.38			NonCoding
TC0100013949.hg.1	9.88	12.01	-4.37	SLC6A9	solute carrier family 6 (neurotransmitter transporter, glycine), member 9	Multiple_Complex
TC1500010542.hg.1	4.74	6.87	-4.37	RP11-236L14.1	novel transcript	NonCoding
TC0900006745.hg.1	3.05	5.18	-4.37	leysyby; tusiro	Transcript Identified by AceView	Multiple_Complex
TC1800008418.hg.1	8.65	10.78	-4.36	GAREM1	GRB2 associated regulator of MAPK1 1	Multiple_Complex
TC0300006695.hg.1	3.86	5.98	-4.36	ruhara	Transcript Identified by AceView	Coding
TC0500009865.hg.1	11.58	13.7	-4.35	showeeby	Transcript Identified by AceView	Coding
TC1700012186.hg.1	8.1	10.22	-4.35	TNFSF13	tumor necrosis factor (ligand) superfamily, member 13	Multiple_Complex
TC0100014531.hg.1	12.28	14.4	-4.34	WLS	wntless Wnt ligand secretion mediator	Multiple_Complex
TC0100006818.hg.1	11.54	13.66	-4.34	PGD	phosphogluconate dehydrogenase	Multiple_Complex
TC16_KI270728v1_random00006439.hg.1	8.09	10.2	-4.34	AC136616.1		Coding
TC1500007410.hg.1	6.44	8.56	-4.34	morser	Transcript Identified by AceView	Coding
TC0600006442.hg.1	4.76	6.88	-4.34	IRF4	interferon regulatory factor 4	Multiple_Complex
TC0900007618.hg.1	3.47	5.58	-4.33	PCSK5	proprotein convertase subtilisin/kexin type 5	Multiple_Complex
TC0500009211.hg.1	12.22	14.33	-4.32	CYFIP2	cytoplasmic FMR1 interacting protein 2	Multiple_Complex
TC0600012299.hg.1	8.45	10.56	-4.32	SLC17A5	solute carrier family 17 (acidic sugar transporter), member 5	Multiple_Complex
TC1300007139.hg.1	4.86	6.97	-4.31	meechee	Transcript Identified by AceView	Coding
TC1900010965.hg.1	3.34	5.45	-4.31	spushar	Transcript Identified by AceView	Coding
TC0400007004.hg.1	4.77	6.87	-4.3			NonCoding
TC0200011449.hg.1	8.42	10.52	-4.29	SH3YL1	SH3 and SYLF domain containing 1	Multiple_Complex
TC1700008511.hg.1	9.61	11.7	-4.28	TBX2	T-box 2	Multiple_Complex
TC0800011891.hg.1	5.3	7.4	-4.27	cheeblu	Transcript Identified by AceView	Unassigned
TC2000007004.hg.1	11.27	13.36	-4.26	RP4-568C11.4	novel transcript	NonCoding
TSUnmapped00000144.hg.1	8.12	10.21	-4.26	DUSP16	dual specificity phosphatase 16	NonCoding
TC0100011253.hg.1	7.28	9.38	-4.26	BTG2	BTG family, member 2	Multiple_Complex
TC0300008243.hg.1	6.93	9.02	-4.26	yawamo	Transcript Identified by AceView	Coding
TC2000007943.hg.1	5.35	7.44	-4.26	CDH26	cadherin 26	Multiple_Complex
TC1800008994.hg.1	2.44	4.53	-4.26			NonCoding
TC0X00008054.hg.1	11.52	13.6	-4.25	RNF128	ring finger protein 128, E3 ubiquitin protein ligase	Multiple_Complex
TC0100009068.hg.1	10.19	12.28	-4.25	LOC100129046; RP5-1033H22.2	uncharacterized LOC100129046; Salzman2013 ANNOTATED, ncRNA, OVCODE, OVERLAPTX, OVEXON best transcript NR_034091; Transcript Identified by AceView, Entrez Gene ID(s) 100129046; putative novel transcript	Multiple_Complex
TC0100010795.hg.1	4	6.09	-4.25	choylobu	Transcript Identified by AceView	Coding
TC0400012496.hg.1	11.78	13.86	-4.24	AGA	aspartylglucosaminidase	Multiple_Complex
TC0100013072.hg.1	10.91	12.99	-4.23	ATP13A2	ATPase type 13A2	Multiple_Complex
TC0X00007579.hg.1	8.1	10.19	-4.23	LINC00891	long intergenic non-protein coding RNA 891	NonCoding
TC2000008345.hg.1	7.85	9.93	-4.23	TMX4	thioredoxin-related transmembrane protein 4	Multiple_Complex
TC0100008347.hg.1	10.32	12.4	-4.22	CPT2	carnitine palmitoyltransferase 2	Multiple_Complex
TC0400011429.hg.1	5.15	7.23	-4.22	DDIT4L	DNA-damage-inducible transcript 4-like	Coding
TC2000006736.hg.1	10.37	12.45	-4.21	SPTLC3	serine palmitoyltransferase, long chain base subunit 3	Multiple_Complex
TC1200006889.hg.1	6.27	8.35	-4.21	RP11-180M15.7	novel transcript	NonCoding
TC0100017030.hg.1	4.77	6.85	-4.21	PIK3C2B	Transcript Identified by AceView, Entrez Gene ID(s) 5287	Unassigned
TC0200015321.hg.1	4.07	6.14	-4.21	lorveybo	Transcript Identified by AceView	Coding
TC1100008392.hg.1	11.44	13.51	-4.2	PLEKHB1	pleckstrin homology domain containing, family B (evectins) member 1	Multiple_Complex
TC1100012681.hg.1	10.74	12.81	-4.2	SIAE	sialic acid acetylesterase	Multiple_Complex
TSUnmapped00000663.hg.1	8.86	10.93	-4.2	SCG5	secretogranin V	NonCoding
TC0300006791.hg.1	11	13.06	-4.19	KAT2B	K(lysine) acetyltransferase 2B	Multiple_Complex
TC1100010242.hg.1	3.51	5.58	-4.19	kafleybu	Transcript Identified by AceView	Unassigned
TC0400010264.hg.1	2.91	4.98	-4.19	royfloy	Transcript Identified by AceView	Unassigned
TC0400012949.hg.1	13.22	15.28	-4.18	SLC39A8	solute carrier family 39 (zinc transporter), member 8	Multiple_Complex
TC1200012819.hg.1	10.57	12.63	-4.18	TMBIM4	transmembrane BAX inhibitor motif containing 4	Multiple_Complex
TC1700011442.hg.1	4.3	6.36	-4.18	PECAM1	platelet/endothelial cell adhesion molecule 1	Multiple_Complex
TC1700011198.hg.1	4	6.06	-4.18			NonCoding
TC1600009555.hg.1	9.67	11.73	-4.17	sweeblo	Transcript Identified by AceView	Unassigned
TC0X00009249.hg.1	5.86	7.92	-4.17			NonCoding
TC1600009635.hg.1	5.56	7.62	-4.17			NonCoding
TC0400012021.hg.1	3.42	5.48	-4.17	HHIP-AS1	HHIP antisense RNA 1	NonCoding
TC0400008698.hg.1	3.4	5.46	-4.17			NonCoding
TC1100011501.hg.1	2.48	4.54	-4.17			Coding
TC1000011002.hg.1	4.87	6.92	-4.15	florswyby	Transcript Identified by AceView	Coding
TC0300013145.hg.1	2.88	4.93	-4.15	glokeebu	Transcript Identified by AceView	NonCoding
TC0900012277.hg.1	8.05	10.1	-4.14	AK1	adenylate kinase 1	Coding
TC1400006644.hg.1	6.62	8.67	-4.14	TRAJ8	T cell receptor alpha joining 8	Pseudogene
TC1900007116.hg.1	4.64	6.69	-4.14	gugly	Transcript Identified by AceView	Coding
TC1200008434.hg.1	3.92	5.97	-4.14	C12orf74	chromosome 12 open reading frame 74	Coding
TC1600006757.hg.1	6.31	8.35	-4.12	SMIM22	small integral membrane protein 22	Multiple_Complex
TC0500011436.hg.1	4.13	6.18	-4.12			NonCoding
TC1100006877.hg.1	3.66	5.7	-4.12	RP11-573E11.2	novel transcript	NonCoding
TC0800010417.hg.1	10.74	12.77	-4.11	PCMTD1	protein-L-isoaspartate (D-aspartate) O-methyltransferase domain containing 1	Multiple_Complex
TC0400012829.hg.1	10.33	12.37	-4.11	ARHGEF38	Rho guanine nucleotide exchange factor 38	Multiple_Complex
TC0500010766.hg.1	10.03	12.07	-4.11	PLPP1; RNF138P1	phospholipid phosphatase 1; ring finger protein 138, E3 ubiquitin protein ligase pseudogene 1	Multiple_Complex
TSUnmapped00000602.hg.1	8.76	10.8	-4.11	SCG5	secretogranin V	Coding
TC0600014082.hg.1	4.72	6.76	-4.11			NonCoding
TC0100017795.hg.1	4.34	6.38	-4.11	flerlobo	Transcript Identified by AceView	Unassigned
TC0200013043.hg.1	3.72	5.76	-4.11	swerkarbu	Transcript Identified by AceView	Unassigned
TC0300008307.hg.1	2.72	4.76	-4.11			NonCoding
TC0100008260.hg.1	8.23	10.26	-4.1	CDKN2C	cyclin-dependent kinase inhibitor 2C (p18, inhibits CDK4)	Coding
TC0200012075.hg.1	5.72	7.76	-4.1	ZNF513	zinc finger protein 513	Multiple_Complex
TC1400009329.hg.1	5.02	7.05	-4.1	RTN1	reticulon 1	Multiple_Complex
TC1600010315.hg.1	4.15	6.19	-4.1	RP11-132F7.2	novel transcript	Unassigned
TC0700009563.hg.1	3.22	5.25	-4.1	veeshuby	Transcript Identified by AceView	Coding
TC1100009981.hg.1	10.79	12.82	-4.09	TPP1	tripeptidyl peptidase I	Multiple_Complex
TC2100007440.hg.1	5.83	7.86	-4.09			NonCoding
TC0500008183.hg.1	2.56	4.6	-4.09	toja	Transcript Identified by AceView	Unassigned
TC1900012058.hg.1	9.01	11.04	-4.08	ZNF417	zinc finger protein 417	Multiple_Complex
TC1100012920.hg.1	6.07	8.1	-4.08	plarfeeby	Transcript Identified by AceView	NonCoding
TC0100013999.hg.1	4.64	6.67	-4.08	ZSWIM5	zinc finger, SWIM-type containing 5	Multiple_Complex
TC0800007191.hg.1	2.99	5.02	-4.08	sarshor	Transcript Identified by AceView	Unassigned
TC0X00007301.hg.1	3.58	5.61	-4.07	XAGE5	X antigen family, member 5	Multiple_Complex
TC0300011224.hg.1	2.87	4.9	-4.07			NonCoding
TC0100011901.hg.1	9.12	11.14	-4.06	RAB4A; SPHAR	RAB4A, member RAS oncogene family; S-phase response (cyclin related)	Multiple_Complex
TSUnmapped00000686.hg.1	4.85	6.87	-4.06	SCG5	secretogranin V	Coding
TC0100018044.hg.1	3.95	5.98	-4.06			NonCoding
TC0400010906.hg.1	3.17	5.19	-4.06			NonCoding
TC1600009414.hg.1	6.07	8.09	-4.05	leewarbu	Transcript Identified by AceView	Coding
TC0X00009715.hg.1	2.95	4.97	-4.05	LOC100131979; LOC100132654; LOC100132751	Transcript Identified by AceView, Entrez Gene ID(s) 100131979; Transcript Identified by AceView, Entrez Gene ID(s) 100132654; Transcript Identified by AceView, Entrez Gene ID(s) 100132751	Unassigned
TC0500010550.hg.1	2.55	4.57	-4.05	slorzoby	Transcript Identified by AceView	Coding
TC1500009772.hg.1	12.31	14.32	-4.04	SPG21	spastic paraplegia 21 (autosomal recessive, Mast syndrome)	Multiple_Complex
TC1400009990.hg.1	4.76	6.77	-4.04	gleepar	Transcript Identified by AceView	Unassigned
TC0500011752.hg.1	4.71	6.73	-4.04	FEM1C	Jeck2013 ALT_ACCEPTOR, ALT_DONOR, coding, INTERNAL, intronic best transcript NM_020177	NonCoding
TC1500007409.hg.1	12.75	14.76	-4.03	GCNT3	glucosaminyl (N-acetyl) transferase 3, mucin type	Multiple_Complex
TC0600014371.hg.1	10.15	12.16	-4.03	RNASET2	ribonuclease T2	Multiple_Complex
TC0300013108.hg.1	7.24	9.25	-4.03	TNIK	TRAF2 and NCK interacting kinase	Multiple_Complex
TC0100015286.hg.1	3.88	5.89	-4.03	jyleybo	Transcript Identified by AceView	Coding
TC0700007836.hg.1	3.34	5.34	-4.03	swasleebu	Transcript Identified by AceView	Coding
TC0200007759.hg.1	9.3	11.31	-4.02	EHBP1	EH domain binding protein 1	Multiple_Complex
TC0700012446.hg.1	5.77	7.78	-4.02	smarkaw	Transcript Identified by AceView	Unassigned
TC1100006581.hg.1	4	6.01	-4.02	feyfleebu	Transcript Identified by AceView	Unassigned
TC0800011474.hg.1	3.88	5.89	-4.02			NonCoding
TC1000009504.hg.1	6.15	8.16	-4.01			Multiple_Complex
TC1200010229.hg.1	4.91	6.91	-4	PTHLH	parathyroid hormone-like hormone	Multiple_Complex
TC1200007861.hg.1	8.04	10.04	-3.99	LRP1	LDL receptor related protein 1	Multiple_Complex
TC1200009452.hg.1	5.66	7.65	-3.99	MMP17	matrix metallopeptidase 17 (membrane-inserted)	Multiple_Complex
TC1300008669.hg.1	3.63	5.63	-3.99			NonCoding
TC0300011976.hg.1	3.37	5.37	-3.99			NonCoding
TC0100006947.hg.1	2.83	4.82	-3.99	florawbo	Transcript Identified by AceView	Coding
TC1900010708.hg.1	12.45	14.44	-3.98	BLVRB	biliverdin reductase B	Multiple_Complex
TC0100016260.hg.1	11.12	13.11	-3.98	ALDH9A1	aldehyde dehydrogenase 9 family, member A1	Multiple_Complex
TC1700012481.hg.1	8.16	10.16	-3.98	TMC6	transmembrane channel like 6	Multiple_Complex
TC0100015866.hg.1	6.03	8.02	-3.98	S100A4	S100 calcium binding protein A4	Multiple_Complex
TC0300013070.hg.1	3.9	5.9	-3.97	flojawbu	Transcript Identified by AceView	Unassigned
TC0300006597.hg.1	2.67	4.66	-3.97	tamora	Transcript Identified by AceView	Unassigned
TC0500010615.hg.1	10.65	12.63	-3.96	SEPP1	selenoprotein P, plasma, 1	Multiple_Complex
TC1400007663.hg.1	8.92	10.9	-3.96	COQ6	coenzyme Q6 monooxygenase	Multiple_Complex
TC0700010437.hg.1	7.64	9.63	-3.96	RAPGEF5	Rap guanine nucleotide exchange factor 5	Multiple_Complex
TC0500009909.hg.1	6.69	8.67	-3.96	IRX2	iroquois homeobox 2	Coding
TC0100017435.hg.1	2.98	4.96	-3.96	HHIPL2	HHIP-like 2	Multiple_Complex
TC0100012097.hg.1	11.64	13.62	-3.95	LGALS8	lectin, galactoside-binding, soluble, 8	Multiple_Complex
TC1100009618.hg.1	11.36	13.34	-3.95	GLB1L2	galactosidase beta 1 like 2	Multiple_Complex
TC1100007800.hg.1	10.17	12.16	-3.95	TKFC	triokinase/FMN cyclase	Multiple_Complex
TC0400009137.hg.1	9.3	11.28	-3.95	FNIP2	folliculin interacting protein 2	Multiple_Complex
TC1000009169.hg.1	8.63	10.61	-3.95	ACADSB	acyl-CoA dehydrogenase, short/branched chain	Multiple_Complex
TC1100006475.hg.1	8.55	10.53	-3.95	RASSF7	Ras association (RalGDS/AF-6) domain family (N-terminal) member 7	Multiple_Complex
TC0500007526.hg.1	2.36	4.34	-3.95			NonCoding
TC0600008310.hg.1	6.92	8.9	-3.94	TINAG	tubulointerstitial nephritis antigen	Multiple_Complex
TC1000010327.hg.1	5.3	7.28	-3.94	FZD8; MIR4683	frizzled class receptor 8; microRNA 4683	Multiple_Complex
TC0700013443.hg.1	4.69	6.66	-3.93	CFTR	cystic fibrosis transmembrane conductance regulator	Multiple_Complex
TC1200012584.hg.1	8.22	10.19	-3.92	TAPBPL	TAP binding protein-like	Multiple_Complex
TC0X00010617.hg.1	2.38	4.35	-3.92			NonCoding
TC1700010592.hg.1	11.46	13.43	-3.91	ORMDL3	ORMDL sphingolipid biosynthesis regulator 3	Multiple_Complex
TC1100010131.hg.1	5.37	7.33	-3.91	RP11-265D17.2	novel transcript	NonCoding
TC1700010054.hg.1	4.87	6.84	-3.91	KRT16P3	keratin 16 pseudogene 3	Multiple_Complex
TC0200013616.hg.1	3.23	5.2	-3.91	AFF3	AF4/FMR2 family, member 3	Multiple_Complex
TC1300007861.hg.1	9.26	11.22	-3.9	PCCA	propionyl-CoA carboxylase alpha subunit	Multiple_Complex
TC0800009302.hg.1	9.05	11.02	-3.9	AC144568.4		Multiple_Complex
TC1200007032.hg.1	4.6	6.56	-3.9	LOC100506393; RP11-664H17.1	uncharacterized LOC100506393; novel transcript	NonCoding
TC0400012459.hg.1	4	5.97	-3.9	klogy	Transcript Identified by AceView	Unassigned
TC1100008523.hg.1	5.89	7.85	-3.89	CAPN5	calpain 5	Multiple_Complex
TC1600007938.hg.1	3.25	5.21	-3.89	CES1P1; CES1	carboxylesterase 1 pseudogene 1; carboxylesterase 1	Multiple_Complex
TC0400010276.hg.1	12.11	14.06	-3.88			NonCoding
TC2000007251.hg.1	8.71	10.67	-3.88	MYL9	myosin light chain 9	Multiple_Complex
TC0400008328.hg.1	6.5	8.45	-3.88	teesnarby	Transcript Identified by AceView	Coding
TC0100015752.hg.1	11.26	13.21	-3.87	CTSS	cathepsin S	Multiple_Complex
TC2000008031.hg.1	4.94	6.9	-3.87	COL9A3	collagen, type IX, alpha 3	Multiple_Complex
TC2200008894.hg.1	3.32	5.27	-3.87	fyshy	Transcript Identified by AceView	Unassigned
TC1000009008.hg.1	2.54	4.5	-3.87			NonCoding
TC1600011451.hg.1	10.9	12.85	-3.86	TCF25	transcription factor 25 (basic helix-loop-helix)	Multiple_Complex
TC1900009074.hg.1	7.33	9.28	-3.86	sytybu	Transcript Identified by AceView	Coding
TC1700007185.hg.1	6.14	8.09	-3.86			NonCoding
TC1900008044.hg.1	5.4	7.35	-3.86	NCCRP1	non-specific cytotoxic cell receptor protein 1 homolog (zebrafish)	Multiple_Complex
TC0800006927.hg.1	4.55	6.5	-3.86	LPL	lipoprotein lipase	Multiple_Complex
TC1700011660.hg.1	3.45	5.4	-3.86	taro	Transcript Identified by AceView	Coding
TC2000007492.hg.1	9.84	11.78	-3.85	WFDC2	WAP four-disulfide core domain 2	Multiple_Complex
TC1800006833.hg.1	3.05	4.99	-3.85			NonCoding
TC0100016318.hg.1	10.32	12.26	-3.84	MPC2	mitochondrial pyruvate carrier 2	Multiple_Complex
TC1200008322.hg.1	9.66	11.6	-3.84	TMTC2	transmembrane and tetratricopeptide repeat containing 2	Multiple_Complex
TC1300007549.hg.1	7.91	9.85	-3.84	CLN5	ceroid-lipofuscinosis, neuronal 5	Multiple_Complex
TC1400009679.hg.1	6.67	8.61	-3.84	FAM161B	family with sequence similarity 161, member B	Multiple_Complex
TC1100006493.hg.1	5.66	7.6	-3.84	CRACR2B	calcium release activated channel regulator 2B	Multiple_Complex
TC1500009875.hg.1	5.32	7.26	-3.84			NonCoding
TC0100010112.hg.1	11.73	13.67	-3.83	SLC50A1	solute carrier family 50 (sugar efflux transporter), member 1	Multiple_Complex
TC1000008221.hg.1	9.22	11.16	-3.83	TMEM254	transmembrane protein 254	Multiple_Complex
TC1300009742.hg.1	3.75	5.68	-3.83			NonCoding
TC0300007895.hg.1	3.5	5.44	-3.83			NonCoding
TC1600011458.hg.1	12.37	14.3	-3.82	MIR6859-2; MIR6859-4; WASH4P	microRNA 6859-2; microRNA 6859-4; WAS protein family homolog 4 pseudogene	Multiple_Complex
TC0400010418.hg.1	12.08	14.02	-3.82	RELL1	RELT-like 1	Multiple_Complex
TC0700008314.hg.1	4.34	6.27	-3.82			NonCoding
TC0400011303.hg.1	4.18	6.11	-3.82	netore	Transcript Identified by AceView	Unassigned
TC2000009357.hg.1	2.31	4.25	-3.82	PREX1	phosphatidylinositol-3,4,5-trisphosphate-dependent Rac exchange factor 1	Multiple_Complex
TC1400008816.hg.1	9.43	11.36	-3.81	PRKD1	protein kinase D1	Multiple_Complex
TC0800008028.hg.1	8.87	10.8	-3.81	PKIA	protein kinase (cAMP-dependent, catalytic) inhibitor alpha	Multiple_Complex
TC0200016774.hg.1	8.73	10.66	-3.81	ABCB6	ATP binding cassette subfamily B member 6 (Langereis blood group)	Multiple_Complex
TC0400007086.hg.1	3.78	5.71	-3.81			NonCoding
TC1900009523.hg.1	2.72	4.65	-3.81	zeeker	Transcript Identified by AceView	Coding
TC1300007404.hg.1	4.1	6.02	-3.8	darcha	Transcript Identified by AceView	Unassigned
TC0600009166.hg.1	4.09	6.01	-3.8			NonCoding
TC0300009334.hg.1	3.32	5.24	-3.8	C3orf80	chromosome 3 open reading frame 80	Multiple_Complex
TC1600011362.hg.1	11.48	13.41	-3.79	ACSM3	acyl-CoA synthetase medium-chain family member 3	Multiple_Complex
TC1600008675.hg.1	10.91	12.83	-3.79	KIAA0513	KIAA0513	Multiple_Complex
TC0900007077.hg.1	10.08	12.01	-3.79	UNC13B	unc-13 homolog B (C. elegans)	Multiple_Complex
TC0100013303.hg.1	9.93	11.85	-3.79	HMGCL	3-hydroxymethyl-3-methylglutaryl-CoA lyase	Multiple_Complex
TC0100011382.hg.1	4.38	6.3	-3.79	DYRK3	dual specificity tyrosine-(Y)-phosphorylation regulated kinase 3	Multiple_Complex
TC0300013112.hg.1	2.84	4.76	-3.79	shoykabu	Transcript Identified by AceView	Coding
TC0100013293.hg.1	9.22	11.14	-3.78	ID3	inhibitor of DNA binding 3, dominant negative helix-loop-helix protein	Multiple_Complex
TC1000010367.hg.1	4.54	6.46	-3.78	ZNF25	zinc finger protein 25	Multiple_Complex
TC1000012409.hg.1	3.09	5.01	-3.78			NonCoding
TC0600007399.hg.1	2.42	4.34	-3.78	beejaw	Transcript Identified by AceView	Unassigned
TC0100018507.hg.1	9.41	11.32	-3.77	ARHGEF2	Rho/Rac guanine nucleotide exchange factor 2	Multiple_Complex
TC0700006700.hg.1	4.87	6.78	-3.77	AC060834.2		Multiple_Complex
TC0900012189.hg.1	10.33	12.24	-3.76	TMEM141	transmembrane protein 141	Multiple_Complex
TC0200007460.hg.1	4.64	6.55	-3.76	jeyjoybu	Transcript Identified by AceView	Unassigned
TC0300010947.hg.1	3.84	5.75	-3.76	LOC102724297; RP11-24F11.2	uncharacterized LOC102724297; novel transcript	NonCoding
TC0300009453.hg.1	3.65	5.56	-3.76	RP11-362K14.6	novel transcript, antisense to LRRC34	NonCoding
TC0400010831.hg.1	2.85	4.76	-3.76	pawgar	Transcript Identified by AceView	Coding
TC1100010893.hg.1	10.1	12.01	-3.75	SLC43A1	solute carrier family 43 (amino acid system L transporter), member 1	Multiple_Complex
TC0200014085.hg.1	9.07	10.98	-3.75	TFCP2L1	transcription factor CP2-like 1	Multiple_Complex
TC0700008182.hg.1	6.96	8.87	-3.75	kleysmeebu	Transcript Identified by AceView	Coding
TC1200012385.hg.1	4.59	6.5	-3.75	RP11-955H22.2		Multiple_Complex
TC0100012543.hg.1	4.51	6.42	-3.75	FAM213B	Memczak2013 ANTISENSE, coding, INTERNAL, UTR3 best transcript NM_001195737	NonCoding
TC0X00009243.hg.1	4.25	6.16	-3.75			NonCoding
TC1200012723.hg.1	11.82	13.72	-3.74	ZNF664	zinc finger protein 664	Multiple_Complex
TC0400012826.hg.1	7.96	9.87	-3.74	HERC3	HECT and RLD domain containing E3 ubiquitin protein ligase 3	Multiple_Complex
TC0500012436.hg.1	6.87	8.77	-3.74			NonCoding
TC0100016438.hg.1	4.64	6.55	-3.74	ANKRD45	ankyrin repeat domain 45	Multiple_Complex
TC0100009418.hg.1	13.18	15.08	-3.73	RAP1A	RAP1A, member of RAS oncogene family	Multiple_Complex
TC1500006803.hg.1	2.64	4.54	-3.73			NonCoding
TC1000006609.hg.1	5.77	7.67	-3.72	U8	U8 small nucleolar RNA [Source:RFAM;Acc:RF00096]	Small_RNA
TC0100010387.hg.1	5.18	7.07	-3.72	DDR2	discoidin domain receptor tyrosine kinase 2	Multiple_Complex
TC1700010582.hg.1	8.73	10.63	-3.71	PGAP3	post-GPI attachment to proteins 3	Multiple_Complex
TC0600007493.hg.1	6.87	8.75	-3.7	HLA-K	major histocompatibility complex, class I, K (pseudogene)	Multiple_Complex
TC0100009098.hg.1	6.1	7.99	-3.7	chawber	Transcript Identified by AceView	Coding
TC1800009277.hg.1	10.7	12.59	-3.69	PIAS2	protein inhibitor of activated STAT 2	Multiple_Complex
TC0800006690.hg.1	4.34	6.22	-3.69			NonCoding
TC1600010184.hg.1	11.19	13.07	-3.68	ITFG1	integrin alpha FG-GAP repeat containing 1	Multiple_Complex
TC0500010639.hg.1	7.47	9.35	-3.68	CCL28	chemokine (C-C motif) ligand 28	Multiple_Complex
TC1600011378.hg.1	10.03	11.9	-3.67	MVP; PAGR1	major vault protein; PAXIP1 associated glutamate-rich protein 1	Multiple_Complex
TC0X00010060.hg.1	14.22	16.09	-3.66	XIST	X inactive specific transcript (non-protein coding)	NonCoding
TC1000011577.hg.1	8.2	10.07	-3.66	PYROXD2; MIR1287	pyridine nucleotide-disulphide oxidoreductase domain 2; microRNA 1287	Multiple_Complex
TC0300009933.hg.1	5.01	6.88	-3.66	LINC00884	long intergenic non-protein coding RNA 884	NonCoding
TC1100008916.hg.1	3.8	5.67	-3.66	sweelarby	Transcript Identified by AceView	Coding
TC0100011414.hg.1	3.02	4.89	-3.66	CR1	complement component (3b/4b) receptor 1 (Knops blood group)	Multiple_Complex
TC1600007107.hg.1	10.26	12.12	-3.65	TMC5	transmembrane channel like 5	Multiple_Complex
TC1100009808.hg.1	6.52	8.39	-3.65	KCNQ1OT1	KCNQ1 opposite strand/antisense transcript 1 (non-protein coding)	NonCoding
TC0100016364.hg.1	9.68	11.54	-3.64	SCYL3	SCY1-like, kinase-like 3	Multiple_Complex
TC0700010352.hg.1	8.72	10.59	-3.64	ANKMY2	ankyrin repeat and MYND domain containing 2	Multiple_Complex
TC1900007399.hg.1	8.06	9.93	-3.64	TMEM59L	transmembrane protein 59-like	Multiple_Complex
TC0400009132.hg.1	8.07	9.93	-3.64	ETFDH	electron-transferring-flavoprotein dehydrogenase	Multiple_Complex
TC1900007365.hg.1	7.35	9.21	-3.64	PIK3R2; IFI30	phosphoinositide-3-kinase, regulatory subunit 2 (beta); interferon, gamma-inducible protein 30	Multiple_Complex
TC0300008948.hg.1	7.23	9.1	-3.64	ESYT3	extended synaptotagmin-like protein 3	Multiple_Complex
TC0200008832.hg.1	3.65	5.52	-3.64	charkler	Transcript Identified by AceView	Multiple_Complex
TC1000011478.hg.1	2.57	4.44	-3.64	CYP2C8	cytochrome P450, family 2, subfamily C, polypeptide 8	Multiple_Complex
TC2100007205.hg.1	8.16	10.02	-3.63	MX2	MX dynamin-like GTPase 2	Multiple_Complex
TC0500011157.hg.1	6.45	8.31	-3.63	GCNT4	glucosaminyl (N-acetyl) transferase 4, core 2	Coding
TC1500010660.hg.1	6.29	8.15	-3.63	PCSK6	proprotein convertase subtilisin/kexin type 6	Multiple_Complex
TC2000008592.hg.1	5.83	7.69	-3.63	flawsarbu	Transcript Identified by AceView	Coding
TC2000008299.hg.1	4.68	6.54	-3.63	GPCPD1	Transcript Identified by AceView, Entrez Gene ID(s) 56261	Unassigned
TC1300008671.hg.1	3.88	5.74	-3.63			NonCoding
TC1200010137.hg.1	2.96	4.82	-3.63	neyswu	Transcript Identified by AceView	Unassigned
TC0100016035.hg.1	10.23	12.09	-3.62	ETV3	ets variant 3	Multiple_Complex
TC0100007885.hg.1	7.77	9.63	-3.62	stokloy	Transcript Identified by AceView	Unassigned
TC0300010989.hg.1	6.39	8.25	-3.62	CSPG5	chondroitin sulfate proteoglycan 5 (neuroglycan C)	Multiple_Complex
TC1000008376.hg.1	4.19	6.05	-3.62			NonCoding
TC1100006871.hg.1	2.85	4.71	-3.62	chaflerbu	Transcript Identified by AceView	Unassigned
TC1800006975.hg.1	2.8	4.65	-3.62			NonCoding
TC0200015032.hg.1	2.77	4.62	-3.62	RP11-387A1.6; jorkler	Transcript Identified by AceView; TEC	Coding
TC2000009955.hg.1	10.92	12.77	-3.61	SLC2A4RG	SLC2A4 regulator	Multiple_Complex
TC0600013119.hg.1	9.7	11.55	-3.61	SOGA3; KIAA0408	SOGA family member 3; KIAA0408	Multiple_Complex
TC1400010019.hg.1	8.04	9.89	-3.61	MOAP1	modulator of apoptosis 1	Coding
TC0300008839.hg.1	7.19	9.04	-3.61	ACPP	acid phosphatase, prostate	Multiple_Complex
TC0600007685.hg.1	5.02	6.87	-3.61	HSD17B8	hydroxysteroid (17-beta) dehydrogenase 8	Multiple_Complex
TC1700011812.hg.1	4.27	6.13	-3.61	RP11-666A8.11		Multiple_Complex
TC1800008249.hg.1	3.98	5.83	-3.61	GATA6-AS1	GATA6 antisense RNA 1 (head to head)	Multiple_Complex
TC0100015398.hg.1	3.56	5.41	-3.61	blarmarbu	Transcript Identified by AceView	Unassigned
TC1700010563.hg.1	9.67	11.51	-3.6	CACNB1	calcium channel, voltage-dependent, beta 1 subunit	Multiple_Complex
TC0900012167.hg.1	9.62	11.47	-3.6	GSN	gelsolin	Multiple_Complex
TC0200015893.hg.1	8.65	10.5	-3.6	DOCK10	dedicator of cytokinesis 10	Multiple_Complex
TC0400008327.hg.1	4.11	5.96	-3.6	koyswoby	Transcript Identified by AceView	Unassigned
TC0100007059.hg.1	3.33	5.18	-3.6	speekerbu	Transcript Identified by AceView	Unassigned
TC0300013490.hg.1	3.06	4.91	-3.6			NonCoding
TC1600008239.hg.1	10.23	12.08	-3.59	WWP2	WW domain containing E3 ubiquitin protein ligase 2	Multiple_Complex
TC0200008976.hg.1	8.59	10.43	-3.59	PGM5P4	phosphoglucomutase 5 pseudogene 4 [Source:HGNC Symbol;Acc:HGNC:49605]	Multiple_Complex
TC1500010725.hg.1	4.47	6.31	-3.59	CAPN3	calpain 3	Multiple_Complex
TC0900011394.hg.1	9.69	11.52	-3.58	C5	complement component 5	Multiple_Complex
TC0X00010982.hg.1	4.9	6.74	-3.58	CDR1	cerebellar degeneration related protein 1	Coding
TC0100018356.hg.1	4.83	6.67	-3.58	RHOU	ras homolog family member U	NonCoding
TC0800008619.hg.1	3.15	4.99	-3.58			NonCoding
TC0100018236.hg.1	11.76	13.59	-3.57	ACADM	acyl-CoA dehydrogenase, C-4 to C-12 straight chain	Multiple_Complex
TC1200008795.hg.1	6.71	8.54	-3.57	ACACB	acetyl-CoA carboxylase beta	Multiple_Complex
TC0400012903.hg.1	6.37	8.21	-3.57	PROM1	prominin 1	Multiple_Complex
TC2000007945.hg.1	4.35	6.18	-3.57	C20orf197	chromosome 20 open reading frame 197	Multiple_Complex
TC1500006786.hg.1	9.29	11.11	-3.56	SCG5	secretogranin V	Multiple_Complex
TC0400012933.hg.1	8.86	10.69	-3.56	NAAA	N-acylethanolamine acid amidase	Multiple_Complex
TC0200008590.hg.1	5.3	7.13	-3.56	AC018690.1		Precursor_microRNA
TC0900007081.hg.1	4.03	5.86	-3.56	ATP8B5P	ATPase, class I, type 8B, member 5, pseudogene	Multiple_Complex
TC2000007954.hg.1	4	5.83	-3.56			NonCoding
TC0600006686.hg.1	3.24	5.07	-3.56			NonCoding
TC0400012646.hg.1	3.08	4.91	-3.56	SORBS2	Transcript Identified by AceView, Entrez Gene ID(s) 8470	Unassigned
TC1100007056.hg.1	2.97	4.81	-3.56	NELL1	neural EGFL like 1	Multiple_Complex
TC0600011392.hg.1	13.21	15.04	-3.55	SFTA2	surfactant associated 2	Multiple_Complex
TC1100013163.hg.1	10.1	11.93	-3.55	APIP	APAF1 interacting protein	Multiple_Complex
TC0100017212.hg.1	8.7	10.53	-3.55	SLC30A1	solute carrier family 30 (zinc transporter), member 1	Multiple_Complex
TC0200010473.hg.1	7.39	9.22	-3.55	FZD7	frizzled class receptor 7	Coding
TC0300009203.hg.1	4.91	6.74	-3.55			NonCoding
TC2000007159.hg.1	3.49	5.32	-3.55	minuru	Transcript Identified by AceView	Coding
TC0600009333.hg.1	6.61	8.43	-3.54	SMPDL3A	sphingomyelin phosphodiesterase, acid-like 3A	Multiple_Complex
TC1400008615.hg.1	6.08	7.9	-3.54	NDRG2; MIR6717	NDRG family member 2; microRNA 6717	Multiple_Complex
TC1700011786.hg.1	4.35	6.18	-3.54	FOXJ1	forkhead box J1	Coding
TC0400012923.hg.1	3.66	5.49	-3.54	UGT2B17	UDP glucuronosyltransferase 2 family, polypeptide B17	Coding
TC0200014851.hg.1	6.31	8.13	-3.53	LRP2	LDL receptor related protein 2	Multiple_Complex
TC1200007864.hg.1	5.58	7.4	-3.53	NXPH4	neurexophilin 4	Multiple_Complex
TC0300013243.hg.1	2.71	4.54	-3.53	kleylobu	Transcript Identified by AceView	Coding
TC0100017120.hg.1	2.57	4.39	-3.53	RP11-164O23.8	novel transcript, antisense to C4BPA	NonCoding
TC0300008244.hg.1	7.21	9.02	-3.52	blababu	Transcript Identified by AceView	Unassigned
TC0600013011.hg.1	5.23	7.04	-3.52	gorjor	Transcript Identified by AceView	Unassigned
TC1200012534.hg.1	4.71	6.53	-3.52	POLE	Transcript Identified by AceView, Entrez Gene ID(s) 5426	Unassigned
TC0100008991.hg.1	3.92	5.74	-3.52	pawkloy	Transcript Identified by AceView	Unassigned
TC1800006854.hg.1	3.79	5.61	-3.52			NonCoding
TC0400010187.hg.1	3.66	5.48	-3.52			NonCoding
TC1100007727.hg.1	11.35	13.16	-3.51	FAM111B	family with sequence similarity 111, member B	Multiple_Complex
TC2200008055.hg.1	10.15	11.96	-3.51	PI4KA	phosphatidylinositol 4-kinase, catalytic, alpha	Multiple_Complex
TSUnmapped00000261.hg.1	6.2	8.01	-3.51	FOXO6	forkhead box O6 [Source:HGNC Symbol;Acc:HGNC:24814]	Coding
TC1600008210.hg.1	5.51	7.32	-3.51	kydo	Transcript Identified by AceView	Unassigned
TC0X00010851.hg.1	5.17	6.98	-3.51	GPC3	glypican 3	Multiple_Complex
TC0400011949.hg.1	4.81	6.62	-3.51	MAML3	mastermind-like transcriptional coactivator 3	Multiple_Complex
TC1600006993.hg.1	4.88	6.69	-3.5	swuwubo	Transcript Identified by AceView	Unassigned
TC0100014848.hg.1	10.11	11.91	-3.49	CCBL2; RBMXL1	cysteine conjugate-beta lyase 2; RNA binding motif protein, X-linked-like 1	Multiple_Complex
TC0100011273.hg.1	7.28	9.08	-3.49	burabu	Transcript Identified by AceView	Coding
TC0200009871.hg.1	6.63	8.43	-3.49	CSRNP3	cysteine-serine-rich nuclear protein 3	Multiple_Complex
TC0900008954.hg.1	5.5	7.3	-3.49	soshaw	Transcript Identified by AceView	Coding
TC1400009678.hg.1	5.38	7.18	-3.49	flerwaw	Transcript Identified by AceView	Coding
TC0900006746.hg.1	4.63	6.44	-3.49	borseyby	Transcript Identified by AceView	Coding
TC0400007104.hg.1	17.05	18.85	-3.48	SLC34A2	solute carrier family 34 (type II sodium/phosphate cotransporter), member 2	Multiple_Complex
TC0100017882.hg.1	3.71	5.51	-3.48			NonCoding
TC0100007412.hg.1	3.17	4.97	-3.48	MAN1C1	mannosidase, alpha, class 1C, member 1	Multiple_Complex
TC0700013581.hg.1	13.61	15.41	-3.47	STEAP4	STEAP family member 4	Coding
TC1100006732.hg.1	9.95	11.74	-3.47	sugyby	Transcript Identified by AceView	Unassigned
TC1100012963.hg.1	9.08	10.87	-3.47	ZBED5-AS1	ZBED5 antisense RNA 1	NonCoding
TC0800007389.hg.1	7.6	9.4	-3.47	C8orf4	chromosome 8 open reading frame 4	Coding
TC0500010731.hg.1	7.29	9.09	-3.47	ARL15	ADP-ribosylation factor like GTPase 15	Multiple_Complex
TC1400008420.hg.1	6.92	8.72	-3.47	CTD-2134A5.3	novel transcript	NonCoding
TC1900011099.hg.1	5.81	7.6	-3.47	HSD17B14	hydroxysteroid (17-beta) dehydrogenase 14	Multiple_Complex
TC2200009257.hg.1	4.7	6.5	-3.47	TCN2	transcobalamin II	Multiple_Complex
TC1500010423.hg.1	4.7	6.49	-3.47	nasku	Transcript Identified by AceView	Coding
TC1200008541.hg.1	4	5.8	-3.47	CFAP54	cilia and flagella associated 54	Multiple_Complex
TC1200008389.hg.1	3.64	5.44	-3.47	RP11-823E8.3	novel transcript	NonCoding
TC1100007339.hg.1	2.7	4.49	-3.47	dercher	Transcript Identified by AceView	Unassigned
TC0600013361.hg.1	13.95	15.74	-3.46	CITED2	Cbp/p300-interacting transactivator, with Glu/Asp rich carboxy-terminal domain, 2	Coding
TC0700008758.hg.1	8.86	10.65	-3.46	slarskerby	Transcript Identified by AceView	Unassigned
TC1000011498.hg.1	3.05	4.84	-3.46	snershu	Transcript Identified by AceView	Unassigned
TC0700008283.hg.1	2.62	4.41	-3.46			NonCoding
TSUnmapped00000709.hg.1	11.45	13.23	-3.45	GOLGA8O	golgin A8 family member O [Source:HGNC Symbol;Acc:HGNC:44406]	Coding
TC0400007362.hg.1	7.88	9.67	-3.45	ATP1B1P1	ATPase, Na+/K+ transporting, beta 1 polypeptide pseudogene 1 [Source:HGNC Symbol;Acc:HGNC:809]	Pseudogene
TC0X00006864.hg.1	3.69	5.47	-3.45			NonCoding
TC0800008833.hg.1	3.06	4.85	-3.45	PRNCR1	prostate cancer associated non-coding RNA 1	NonCoding
TC0900006937.hg.1	11.9	13.68	-3.44	ACO1	aconitase 1, soluble	Multiple_Complex
TC0500013015.hg.1	8.34	10.13	-3.44	PHYKPL	5-phosphohydroxy-L-lysine phospho-lyase	Multiple_Complex
TC0600011503.hg.1	6.03	7.81	-3.44	HLA-DQB2	major histocompatibility complex, class II, DQ beta 2	Coding
TC1700008865.hg.1	4.32	6.1	-3.44			NonCoding
TC1600007870.hg.1	3.1	4.88	-3.44			NonCoding
TC0800010408.hg.1	3.02	4.8	-3.44			NonCoding
TC0400007103.hg.1	2.72	4.51	-3.44			NonCoding
TC1200008005.hg.1	9.39	11.17	-3.43	RASSF3	Ras association (RalGDS/AF-6) domain family member 3	Multiple_Complex
TC1100008477.hg.1	9.14	10.92	-3.43	DGAT2	diacylglycerol O-acyltransferase 2	Multiple_Complex
TC0300007779.hg.1	3.93	5.7	-3.43	noyswerby	Transcript Identified by AceView	Unassigned
TC0100014755.hg.1	11.18	12.95	-3.42	CTBS	chitobiase, di-N-acetyl-	Multiple_Complex
TC2100006998.hg.1	5.07	6.84	-3.42	slawser	Transcript Identified by AceView	Coding
TC0700010358.hg.1	4.92	6.69	-3.42	AGR3	anterior gradient 3, protein disulphide isomerase family member	Multiple_Complex
TC0700010348.hg.1	4.61	6.38	-3.42	SOSTDC1	sclerostin domain containing 1	Coding
TC0500011396.hg.1	2.52	4.29	-3.42	sneefler	Transcript Identified by AceView	Unassigned
TC0300013489.hg.1	2.07	3.84	-3.42			NonCoding
TC1300006676.hg.1	6.42	8.19	-3.41	RASL11A	RAS-like, family 11, member A	Multiple_Complex
TC0Y00006444.hg.1	6.22	7.99	-3.41	CSF2RA	colony stimulating factor 2 receptor, alpha, low-affinity (granulocyte-macrophage)	Multiple_Complex
TC1000009649.hg.1	5.71	7.48	-3.41	U8	U8 small nucleolar RNA [Source:RFAM;Acc:RF00096]	Small_RNA
TC0X00010101.hg.1	3.65	5.42	-3.41	lavar	Transcript Identified by AceView	Unassigned
TC1100007557.hg.1	3.02	4.79	-3.41	RP11-347H15.1		Pseudogene
TC0800009113.hg.1	10.44	12.21	-3.4	PTP4A3	protein tyrosine phosphatase type IVA, member 3	Multiple_Complex
TC1200011770.hg.1	7.49	9.26	-3.4	ALDH1L2	aldehyde dehydrogenase 1 family, member L2	Multiple_Complex
TC1700012460.hg.1	6.17	7.94	-3.4	ABCA5	ATP binding cassette subfamily A member 5	Multiple_Complex
TC0800007238.hg.1	3.97	5.73	-3.4	kuskarbu	Transcript Identified by AceView	Coding
TC0800008835.hg.1	3.93	5.69	-3.4			NonCoding
TC1600010318.hg.1	3.86	5.62	-3.4	koysno	Transcript Identified by AceView	Coding
TC0200010307.hg.1	3.77	5.53	-3.4			NonCoding
TC1100008689.hg.1	3.66	5.43	-3.4	RP11-665E10.2	novel transcript	Unassigned
TC1500010842.hg.1	9.96	11.72	-3.39	GOLGA8R	golgin A8 family, member R	Multiple_Complex
TC1200007166.hg.1	2.8	4.56	-3.39			NonCoding
TC1700007791.hg.1	10.28	12.04	-3.38	RARA	retinoic acid receptor, alpha	Multiple_Complex
TC1700007777.hg.1	9.75	11.5	-3.38	THRA	thyroid hormone receptor, alpha	Multiple_Complex
TC0100011282.hg.1	8.86	10.62	-3.38	SOX13	SRY box 13	Multiple_Complex
TC0100013551.hg.1	6.87	8.63	-3.38	gleeplo	Transcript Identified by AceView	Unassigned
TC1200012592.hg.1	6.45	8.21	-3.38	C1S	complement component 1, s subcomponent	Multiple_Complex
TC1400009671.hg.1	3.63	5.38	-3.38	sleychoybu	Transcript Identified by AceView	Coding
TC1900011627.hg.1	3.3	5.06	-3.38	ZNF132	zinc finger protein 132	Multiple_Complex
TC0700011832.hg.1	2.71	4.47	-3.38			NonCoding
TC0100017491.hg.1	15.01	16.76	-3.37	ENAH	enabled homolog (Drosophila)	Multiple_Complex
TC2000008473.hg.1	9.68	11.43	-3.37	KIF16B	kinesin family member 16B	Multiple_Complex
TC0200016571.hg.1	8.34	10.09	-3.37	OSBPL6	oxysterol binding protein-like 6	Multiple_Complex
TC1700010453.hg.1	6.69	8.44	-3.37	CTB-186H2.2		Pseudogene
TC0400010132.hg.1	11.76	13.51	-3.36	TAPT1	transmembrane anterior posterior transformation 1	Multiple_Complex
TC1200012606.hg.1	7.66	9.4	-3.36	LRMP	lymphoid-restricted membrane protein	Multiple_Complex
TC1100006492.hg.1	6.92	8.67	-3.36	PNPLA2	patatin-like phospholipase domain containing 2	Multiple_Complex
TC1100012469.hg.1	6.04	7.79	-3.36	SCN4B	sodium channel, voltage gated, type IV beta subunit	Multiple_Complex
TC1200009878.hg.1	2.97	4.72	-3.36			NonCoding
TC1200011099.hg.1	15.51	17.26	-3.35	GNS	glucosamine (N-acetyl)-6-sulfatase	Multiple_Complex
TC0200016469.hg.1	12.26	14	-3.35	ANXA4	annexin A4	Multiple_Complex
TC1600010676.hg.1	10.72	12.46	-3.35	ESRP2; MIR6773	epithelial splicing regulatory protein 2; microRNA 6773	Multiple_Complex
TC0300008484.hg.1	6.22	7.97	-3.35	PLA1A	phospholipase A1 member A	Multiple_Complex
TC0400010889.hg.1	3.18	4.92	-3.35	ST3GAL1P1	ST3 beta-galactoside alpha-2,3-sialyltransferase 1 pseudogene 1 [Source:HGNC Symbol;Acc:HGNC:45174]	Pseudogene
TC0100011124.hg.1	3.13	4.87	-3.35	garbor	Transcript Identified by AceView	NonCoding
TC0700008882.hg.1	13.16	14.91	-3.34	ST7; ST7-OT4; ST7-OT3; MIR6132	suppression of tumorigenicity 7; ST7 overlapping transcript 4; ST7 overlapping transcript 3; microRNA 6132	Multiple_Complex
TC0800011312.hg.1	12.46	14.2	-3.34	RRM2B	ribonucleotide reductase M2 B (TP53 inducible)	Multiple_Complex
TC0100010104.hg.1	11.23	12.96	-3.34	ZBTB7B	zinc finger and BTB domain containing 7B	Multiple_Complex
TC2200007995.hg.1	4.74	6.48	-3.34			NonCoding
TC1800007899.hg.1	3.69	5.43	-3.34	CBX3P2	chromobox homolog 3 pseudogene 2	Multiple_Complex
TC0500007514.hg.1	2.6	4.34	-3.34			NonCoding
TC0700012646.hg.1	2.39	4.13	-3.34			NonCoding
TC1900008507.hg.1	16.39	18.13	-3.33	FTL	ferritin, light polypeptide	Multiple_Complex
TC1200011528.hg.1	3.63	5.36	-3.33			NonCoding
TC0600007804.hg.1	3.49	5.22	-3.33	RP3-340B19.3	novel transcript	NonCoding
TC1200007351.hg.1	2.6	4.33	-3.33	AC079630.2; snynaw	putative novel transcript; Transcript Identified by AceView	Multiple_Complex
TC0700011835.hg.1	15.32	17.05	-3.32	PON2	paraoxonase 2	Multiple_Complex
TC1500007067.hg.1	13.03	14.76	-3.32	CKMT1A	creatine kinase, mitochondrial 1A	Multiple_Complex
TC0100007574.hg.1	12.17	13.9	-3.32	EPB41	erythrocyte membrane protein band 4.1	Multiple_Complex
TC1600011047.hg.1	9.97	11.7	-3.32	HSDL1	hydroxysteroid dehydrogenase like 1	Multiple_Complex
TC1700007319.hg.1	9.49	11.22	-3.32	WSB1	WD repeat and SOCS box containing 1	Multiple_Complex
TC1200007653.hg.1	9.19	10.92	-3.32	NR4A1	nuclear receptor subfamily 4, group A, member 1	Multiple_Complex
TC1300007797.hg.1	5.18	6.91	-3.32	zeyzoy	Transcript Identified by AceView	Unassigned
TC1200012108.hg.1	3.86	5.59	-3.32	smogoyby	Transcript Identified by AceView	Unassigned
TC2200006878.hg.1	3.68	5.41	-3.32	GSTT2	glutathione S-transferase theta 2 (gene/pseudogene)	Multiple_Complex
TC1700011970.hg.1	9.64	11.37	-3.31	SGSH	N-sulfoglucosamine sulfohydrolase	Multiple_Complex
TC0300010427.hg.1	8.24	9.97	-3.31	RFTN1	raftlin, lipid raft linker 1	Multiple_Complex
TC1200011435.hg.1	7.25	8.97	-3.31	RASSF9	Ras association (RalGDS/AF-6) domain family (N-terminal) member 9	Coding
TC1100013142.hg.1	5.06	6.79	-3.31	LOC283299; RP11-35J10.5; RP11-494M8.4	uncharacterized LOC283299; Transcript Identified by AceView, Entrez Gene ID(s) 283299; novel transcipt, sense overlapping OR5P2, OR5P3 and OR5P1P	Multiple_Complex
TC1500007015.hg.1	4.37	6.09	-3.31	JMJD7; PLA2G4B; JMJD7-PLA2G4B	jumonji domain containing 7; phospholipase A2, group IVB (cytosolic); JMJD7-PLA2G4B readthrough	Multiple_Complex
TC1200007355.hg.1	3.98	5.71	-3.31	veyjerby	Transcript Identified by AceView	Coding
TC1800007902.hg.1	2.83	4.56	-3.31	korwu	Transcript Identified by AceView	Unassigned
TC1500009358.hg.1	13.68	15.4	-3.3	SECISBP2L	SECIS binding protein 2-like	Multiple_Complex
TC0100011374.hg.1	8.34	10.06	-3.3	IKBKE	inhibitor of kappa light polypeptide gene enhancer in B-cells, kinase epsilon	Multiple_Complex
TC0800006825.hg.1	6.93	8.65	-3.3			NonCoding
TC1900007605.hg.1	6.22	7.94	-3.3			NonCoding
TC1900008543.hg.1	5.42	7.14	-3.3	FCGRT	Fc fragment of IgG, receptor, transporter, alpha	Multiple_Complex
TC1200010352.hg.1	5.2	6.92	-3.3	SYT10	synaptotagmin X	Multiple_Complex
TC1800007683.hg.1	3.99	5.71	-3.3	fleywo	Transcript Identified by AceView	Coding
TC1600007304.hg.1	2.92	4.64	-3.3			NonCoding
TC0200007423.hg.1	2.9	4.62	-3.3	fleyjorbu	Transcript Identified by AceView	Coding
TC0200007954.hg.1	14.1	15.82	-3.29	PCYOX1	prenylcysteine oxidase 1	Multiple_Complex
TC1400010797.hg.1	11.59	13.31	-3.29	NUDT14	nudix hydrolase 14	Multiple_Complex
TC0100017730.hg.1	11.29	13.01	-3.29	EGLN1	egl-9 family hypoxia-inducible factor 1	Multiple_Complex
TC1600007739.hg.1	11.2	12.92	-3.29	PHKB	phosphorylase kinase, beta	Multiple_Complex
TC0100014040.hg.1	10.29	12.01	-3.29	PIK3R3	phosphoinositide-3-kinase, regulatory subunit 3 (gamma)	Multiple_Complex
TC0100014365.hg.1	9.62	11.34	-3.29	CYP2J2	cytochrome P450, family 2, subfamily J, polypeptide 2	Multiple_Complex
TC1700008378.hg.1	9.26	10.98	-3.29	MSI2	musashi RNA binding protein 2	Multiple_Complex
TC1300008894.hg.1	5.41	7.13	-3.29	RCBTB2	regulator of chromosome condensation (RCC1) and BTB (POZ) domain containing protein 2	Multiple_Complex
TC0700010603.hg.1	4.57	6.29	-3.29	TRIL	TLR4 interactor with leucine-rich repeats	Multiple_Complex
TC1200007895.hg.1	13.02	14.73	-3.28	OS9	osteosarcoma amplified 9, endoplasmic reticulum lectin	Multiple_Complex
TC0100012496.hg.1	12.03	13.74	-3.28	NADK	NAD kinase	Multiple_Complex
TC0100018344.hg.1	11.45	13.16	-3.28	LYPLAL1	lysophospholipase-like 1	Multiple_Complex
TC0100009191.hg.1	11.33	13.04	-3.28	AGL	amylo-alpha-1, 6-glucosidase, 4-alpha-glucanotransferase	Multiple_Complex
TC1600011372.hg.1	9.45	11.16	-3.28	SULT1A4; SULT1A3	sulfotransferase family 1A member 4; sulfotransferase family 1A member 3	Multiple_Complex
TC0100016629.hg.1	6.58	8.29	-3.28	RNASEL	ribonuclease L (2,5-oligoisoadenylate synthetase-dependent)	Coding
TC1700009938.hg.1	5.51	7.22	-3.28	RASD1	RAS, dexamethasone-induced 1	Coding
TC0600009103.hg.1	3.25	4.96	-3.28	rerglorby	Transcript Identified by AceView	Coding
TC1600010719.hg.1	2.89	4.6	-3.28	losnee	Transcript Identified by AceView	Unassigned
TC2000008638.hg.1	2.63	4.34	-3.28			NonCoding
TC0100018462.hg.1	11.76	13.47	-3.27	CLCC1	chloride channel CLIC-like 1	Multiple_Complex
TC1400009787.hg.1	11.63	13.34	-3.27	SPTLC2	serine palmitoyltransferase, long chain base subunit 2	Multiple_Complex
TC1600007887.hg.1	11.3	13.01	-3.27	RBL2	retinoblastoma-like 2	Multiple_Complex
TC0100009183.hg.1	8.3	10.01	-3.27	PALMD	palmdelphin	Multiple_Complex
TC1900009852.hg.1	6.73	8.44	-3.27	ILVBL	ilvB (bacterial acetolactate synthase)-like	Multiple_Complex
TC0400012013.hg.1	3.38	5.09	-3.27			NonCoding
TC1000006481.hg.1	3.37	5.08	-3.27			NonCoding
TC0500007303.hg.1	10.83	12.53	-3.26	NNT	nicotinamide nucleotide transhydrogenase	Multiple_Complex
TC0100007406.hg.1	10.3	12.01	-3.26	LDLRAP1	low density lipoprotein receptor adaptor protein 1	Multiple_Complex
TC1700010230.hg.1	6.87	8.57	-3.26	TIAF1; MYO18A	TGFB1-induced anti-apoptotic factor 1; myosin XVIIIA	Multiple_Complex
TC0100010609.hg.1	6.44	8.14	-3.26	DNM3	dynamin 3	Multiple_Complex
TC1500007336.hg.1	4.59	6.29	-3.26	chuzerbu	Transcript Identified by AceView	Unassigned
TC1500010115.hg.1	3.48	5.18	-3.26			NonCoding
TC1600006790.hg.1	3.36	5.06	-3.26	A2BP1	Transcript Identified by AceView, Entrez Gene ID(s) 54715	Unassigned
TC0100013768.hg.1	3.26	4.97	-3.26			NonCoding
TC1100011040.hg.1	11.44	13.14	-3.25	SYT7	synaptotagmin VII	Multiple_Complex
TC0100011665.hg.1	10.14	11.84	-3.25	2018-03-01	mitochondrial amidoxime reducing component 1	Multiple_Complex
TC0100007207.hg.1	6.74	8.44	-3.25	PINK1; MIR6084	PTEN induced putative kinase 1; microRNA 6084	Multiple_Complex
TC0X00006446.hg.1	6.12	7.82	-3.25	CSF2RA	colony stimulating factor 2 receptor, alpha, low-affinity (granulocyte-macrophage)	Multiple_Complex
TC0400011194.hg.1	5.12	6.83	-3.25	nosnaby	Transcript Identified by AceView	Unassigned
TC0200007614.hg.1	4.62	6.32	-3.25	torkly	Transcript Identified by AceView	Coding
TC0600010934.hg.1	3.06	4.77	-3.25	sakaya	Transcript Identified by AceView	Coding
TC0200012656.hg.1	11.81	13.5	-3.24	EFEMP1	EGF containing fibulin-like extracellular matrix protein 1	Multiple_Complex
TC0900006938.hg.1	3.88	5.58	-3.24	swyrorbu	Transcript Identified by AceView	Unassigned
TC2000008484.hg.1	3.4	5.1	-3.24			NonCoding
TC1500010712.hg.1	12.25	13.95	-3.23	GOLGA8N	golgin A8 family, member N	Multiple_Complex
TC0100010297.hg.1	11.84	13.53	-3.23	NCSTN	nicastrin	Multiple_Complex
TC0200015194.hg.1	11.15	12.84	-3.23	TFPI	tissue factor pathway inhibitor (lipoprotein-associated coagulation inhibitor)	Multiple_Complex
TC0700013082.hg.1	10.36	12.05	-3.23	PRKAG2	protein kinase, AMP-activated, gamma 2 non-catalytic subunit	Multiple_Complex
TC0100015264.hg.1	8.1	9.79	-3.23	RP5-1180E21.5	novel transcript, antisense to CEPT1	NonCoding
TC2000006721.hg.1	6.53	8.22	-3.23	BTBD3	BTB (POZ) domain containing 3	Multiple_Complex
TC1300009580.hg.1	5.52	7.22	-3.23	SLC15A1	solute carrier family 15 (oligopeptide transporter), member 1	Multiple_Complex
TC1400010785.hg.1	5.43	7.12	-3.23	LINC01550	long intergenic non-protein coding RNA 1550	Multiple_Complex
TC0200013598.hg.1	4.5	6.19	-3.23	jojybu	Transcript Identified by AceView	Coding
TC0100016853.hg.1	3.95	5.64	-3.23			NonCoding
TC1800008580.hg.1	3.52	5.21	-3.23	PSTPIP2	proline-serine-threonine phosphatase interacting protein 2	Multiple_Complex
TC0700013356.hg.1	12.02	13.71	-3.22	EPDR1	ependymin related 1	Coding
TC2200007932.hg.1	10.09	11.77	-3.22	PI4KAP1	phosphatidylinositol 4-kinase, catalytic, alpha pseudogene 1	Multiple_Complex
TC2000008244.hg.1	9.25	10.94	-3.22			NonCoding
TC1200010921.hg.1	9.05	10.74	-3.22	GLS2	glutaminase 2 (liver, mitochondrial)	Multiple_Complex
TC1000011081.hg.1	7.79	9.48	-3.22	ZNF503	zinc finger protein 503	Multiple_Complex
TC1100011362.hg.1	7.33	9.02	-3.22			NonCoding
TC1000007518.hg.1	6.86	8.55	-3.22	SYT15	synaptotagmin XV	Multiple_Complex
TC0100015674.hg.1	5.01	6.7	-3.22	speelabu	Transcript Identified by AceView	Unassigned
TC1200006997.hg.1	4.52	6.2	-3.22	RP11-459D22.1		Multiple_Complex
TC0100014089.hg.1	3.83	5.52	-3.22			NonCoding
TC0X00006452.hg.1	2.8	4.49	-3.22	serree	Transcript Identified by AceView	Coding
TC0Y00006450.hg.1	2.8	4.49	-3.22	varbo	Transcript Identified by AceView	Coding
TC0300009463.hg.1	5.39	7.07	-3.21	RP11-379K17.12	novel transcript, antisense to PHC3	NonCoding
TC0300011496.hg.1	4.28	5.96	-3.21			NonCoding
TC0900008811.hg.1	12.47	14.15	-3.2	STXBP1	syntaxin binding protein 1	Multiple_Complex
TC1500010888.hg.1	10.43	12.11	-3.2	PARP6	poly(ADP-ribose) polymerase family member 6	Multiple_Complex
TC0100012895.hg.1	6.72	8.4	-3.2	MTHFR	methylenetetrahydrofolate reductase (NAD(P)H)	Multiple_Complex
TC0100011407.hg.1	6.42	8.1	-3.2	juply	Transcript Identified by AceView	Unassigned
TC1000008799.hg.1	4.58	6.25	-3.2			NonCoding
TC0800007009.hg.1	3.4	5.08	-3.2			NonCoding
TC0200009878.hg.1	3.45	5.12	-3.19			NonCoding
TC0400010302.hg.1	3.25	4.93	-3.19			NonCoding
TC2000007368.hg.1	3.18	4.86	-3.19			NonCoding
TC0100007243.hg.1	3.17	4.85	-3.19	ALPL	alkaline phosphatase, liver/bone/kidney	Multiple_Complex
TC0X00010882.hg.1	2.68	4.36	-3.19	chydar	Transcript Identified by AceView	Coding
TC1600008992.hg.1	10.87	12.54	-3.18			NonCoding
TC0600007530.hg.1	8.08	9.74	-3.18	HLA-E	major histocompatibility complex, class I, E	Multiple_Complex
TC0700013217.hg.1	5.77	7.43	-3.18	smuslawbu	Transcript Identified by AceView	Unassigned
TC1300008948.hg.1	3.77	5.44	-3.18	geypy	Transcript Identified by AceView	Unassigned
TC1500009501.hg.1	4.8	6.46	-3.17	leepee	Transcript Identified by AceView	Coding
TC1000012092.hg.1	4.75	6.42	-3.17			NonCoding
TC0600011518.hg.1	3.77	5.43	-3.17			NonCoding
TC0600009396.hg.1	3.72	5.39	-3.17	dawtoyby	Transcript Identified by AceView	Coding
TC0100007208.hg.1	3.36	5.03	-3.17	kolorbu	Transcript Identified by AceView	Coding
TC1200011634.hg.1	3.32	4.99	-3.17	LOC643711	platelet-activating factor acetylhydrolase 1b, catalytic subunit 2 (30kDa) pseudogene; Transcript Identified by AceView, Entrez Gene ID(s) 643711	Multiple_Complex
TC0600012024.hg.1	12.05	13.71	-3.16	FTH1P5	ferritin, heavy polypeptide 1 pseudogene 5 [Source:HGNC Symbol;Acc:HGNC:3996]	Multiple_Complex
TC0400007128.hg.1	9.11	10.77	-3.16	TBC1D19	TBC1 domain family, member 19	Multiple_Complex
TC0100006675.hg.1	7.87	9.53	-3.16	KCNAB2	potassium channel, voltage gated subfamily A regulatory beta subunit 2	Multiple_Complex
TC0800009262.hg.1	7.16	8.82	-3.16	KIFC2	kinesin family member C2	Multiple_Complex
TC0400007016.hg.1	6.82	8.48	-3.16	SLIT2	slit guidance ligand 2	Multiple_Complex
TC0400011234.hg.1	6.52	8.17	-3.16	MAPK10	mitogen-activated protein kinase 10	Multiple_Complex
TC1200008667.hg.1	5.74	7.4	-3.16	HSP90B1	Transcript Identified by AceView, Entrez Gene ID(s) 7184	Unassigned
TC0200008273.hg.1	5.59	7.26	-3.16	ST3GAL5-AS1	ST3GAL5 antisense RNA 1 (head to head)	NonCoding
TC1500008900.hg.1	3.29	4.94	-3.16	LOC283710; RP11-16E12.2; rukama	uncharacterized LOC283710; novel transcript; Transcript Identified by AceView	Multiple_Complex
TC0300008366.hg.1	2.51	4.17	-3.16			NonCoding
TC0800009735.hg.1	12.02	13.68	-3.15	MTUS1	microtubule associated tumor suppressor 1	Multiple_Complex
TC0200015211.hg.1	11.46	13.12	-3.15	SLC40A1	solute carrier family 40 (iron-regulated transporter), member 1	Multiple_Complex
TC0900007904.hg.1	7.43	9.08	-3.15	SYK	spleen tyrosine kinase	Multiple_Complex
TC1100010946.hg.1	6.55	8.2	-3.15	LPXN	leupaxin	Multiple_Complex
TC1600008973.hg.1	4.84	6.49	-3.15	FBXL16	F-box and leucine-rich repeat protein 16	Multiple_Complex
TC1400007753.hg.1	4.47	6.13	-3.15	terbeyby	Transcript Identified by AceView	Unassigned
TC0100007399.hg.1	3.91	5.57	-3.15			NonCoding
TC0200015657.hg.1	3.84	5.49	-3.15	LINC00607	long intergenic non-protein coding RNA 607	NonCoding
TC0100016374.hg.1	3.5	5.15	-3.15			NonCoding
TC2200006846.hg.1	3.07	4.73	-3.15			NonCoding
TC0600008565.hg.1	2.44	4.1	-3.15	chajar	Transcript Identified by AceView	Unassigned
TC0200014834.hg.1	13.53	15.18	-3.14	STK39	serine threonine kinase 39	Multiple_Complex
TC0700008181.hg.1	13.06	14.71	-3.14	GNAI1	guanine nucleotide binding protein (G protein), alpha inhibiting activity polypeptide 1	Multiple_Complex
TC1600011221.hg.1	9.52	11.17	-3.14	MVD	mevalonate (diphospho) decarboxylase	Multiple_Complex
TC1900011100.hg.1	8.92	10.57	-3.14	shuwu	Transcript Identified by AceView	Coding
TC0100015932.hg.1	5.65	7.3	-3.14	PBXIP1	pre-B-cell leukemia homeobox interacting protein 1	Multiple_Complex
TC0400012082.hg.1	5.42	7.06	-3.14	blarbeebo	Transcript Identified by AceView	Unassigned
TC0400010467.hg.1	5.4	7.05	-3.14	fuglarby	Transcript Identified by AceView	Coding
TC0800008076.hg.1	5.04	6.69	-3.14	RP11-1149M10.2	novel transcript	NonCoding
TC0300008245.hg.1	4.27	5.93	-3.14	ig.217	Transcript Identified by AceView	Coding
TC1200010139.hg.1	3.82	5.48	-3.14	lochaw	Transcript Identified by AceView	Unassigned
TC1200007353.hg.1	3.7	5.35	-3.14	royshy	Transcript Identified by AceView	NonCoding
TC0200007458.hg.1	13.61	15.26	-3.13	EPAS1	endothelial PAS domain protein 1	Multiple_Complex
TC1500008933.hg.1	10.87	12.51	-3.13	GOLGA8O	golgin A8 family, member O	Multiple_Complex
TC1500008988.hg.1	10.46	12.1	-3.13	GOLGA8A; GOLGA8B	golgin A8 family, member A; golgin A8 family, member B	Multiple_Complex
TC1100013175.hg.1	10.43	12.08	-3.13	HNRNPUL2-BSCL2	HNRNPUL2-BSCL2 readthrough (NMD candidate)	Multiple_Complex
TC0700011556.hg.1	9.3	10.95	-3.13	HIP1	huntingtin interacting protein 1	Multiple_Complex
TC0700009318.hg.1	6.31	7.95	-3.13	swybler	Transcript Identified by AceView	Unassigned
TC0400009300.hg.1	6.15	7.8	-3.13	LINC01612	long intergenic non-protein coding RNA 1612	NonCoding
TC0600014192.hg.1	5.76	7.41	-3.13	RP11-307P5.1; SAMD5	novel transcript; Transcript Identified by AceView, Entrez Gene ID(s) 389432	NonCoding
TC1600009395.hg.1	4.93	6.58	-3.13	SOCS1	suppressor of cytokine signaling 1	Coding
TC1100009060.hg.1	3.12	4.77	-3.13	LOC100132686; RP11-356J5.13	uncharacterized LOC100132686; novel transcript, antisense to C11orf34	Multiple_Complex
TC0900010988.hg.1	3.04	4.69	-3.13	glawplabu	Transcript Identified by AceView	Unassigned
TC1600008212.hg.1	8.6	10.24	-3.12	glusmer	Transcript Identified by AceView	Coding
TC1100010885.hg.1	6.23	7.87	-3.12	TNKS1BP1	tankyrase 1 binding protein 1	Multiple_Complex
TC0100010345.hg.1	6.14	7.78	-3.12	PCP4L1	Purkinje cell protein 4 like 1	Coding
TC1200009111.hg.1	5.43	7.07	-3.12	CCDC64	coiled-coil domain containing 64	Multiple_Complex
TC0900009499.hg.1	2.79	4.43	-3.12	churoyby	Transcript Identified by AceView	Coding
TC1700012089.hg.1	12.42	14.06	-3.11	DCXR	dicarbonyl/L-xylulose reductase	Multiple_Complex
TC0800007080.hg.1	12.28	13.91	-3.11	BNIP3L	BCL2/adenovirus E1B 19kDa interacting protein 3-like	Multiple_Complex
TC0500013429.hg.1	11.81	13.45	-3.11	RNF130	ring finger protein 130	Multiple_Complex
TC0600008757.hg.1	10.53	12.16	-3.11	PNRC1	proline-rich nuclear receptor coactivator 1	Multiple_Complex
TC1500009457.hg.1	9.55	11.19	-3.11	MYO5A	myosin VA	Multiple_Complex
TC0300014073.hg.1	9.33	10.96	-3.11	PLCH1	phospholipase C, eta 1	Multiple_Complex
TC0100018308.hg.1	8.84	10.48	-3.11	FCGR2A	Fc fragment of IgG, low affinity IIa, receptor (CD32)	Multiple_Complex
TC0100018355.hg.1	5.84	7.48	-3.11	RHOU	ras homolog family member U	Multiple_Complex
TC2200008232.hg.1	5.7	7.34	-3.11	LL22NC03-N95F10.1	novel transcript	NonCoding
TC0300009285.hg.1	3.49	5.12	-3.11			NonCoding
TC0100006749.hg.1	3.09	4.73	-3.11			NonCoding
TC2000008328.hg.1	2.44	4.07	-3.11			NonCoding
TC1800007066.hg.1	11.8	13.43	-3.1	MAPRE2	microtubule-associated protein, RP/EB family, member 2	Multiple_Complex
TC0100013131.hg.1	9.16	10.8	-3.1	AKR7A2	aldo-keto reductase family 7, member A2	Multiple_Complex
TC2000007997.hg.1	3.81	5.44	-3.1	tuheru	Transcript Identified by AceView	Coding
TC0X00011338.hg.1	13.11	14.74	-3.09	ARSD	arylsulfatase D	Multiple_Complex
TC0400009322.hg.1	12.99	14.62	-3.09	GALNT7	polypeptide N-acetylgalactosaminyltransferase 7	Multiple_Complex
TSUnmapped00000783.hg.1	11.77	13.4	-3.09	RP11-382B18.5		Pseudogene
TC1400009682.hg.1	8.54	10.17	-3.09	ENTPD5	ectonucleoside triphosphate diphosphohydrolase 5	Multiple_Complex
TC2000008123.hg.1	5.96	7.59	-3.09	NRSN2-AS1	NRSN2 antisense RNA 1	NonCoding
TC0600009764.hg.1	3.41	5.03	-3.09			NonCoding
TC0300010753.hg.1	2.99	4.62	-3.09			NonCoding
TC1700007997.hg.1	13.7	15.32	-3.08	GRN	granulin	Multiple_Complex
TC0100007505.hg.1	10.23	11.85	-3.08	WDTC1	WD and tetratricopeptide repeats 1	Multiple_Complex
TC1700006702.hg.1	10.04	11.66	-3.08	TXNDC17	thioredoxin domain containing 17	Multiple_Complex
TC0500012539.hg.1	9.29	10.91	-3.08	FAM114A2	family with sequence similarity 114, member A2	Multiple_Complex
TC1600007636.hg.1	7.89	9.52	-3.08	RP11-598D12.4		Pseudogene
TC0900010867.hg.1	4.86	6.48	-3.08	blargar	Transcript Identified by AceView	Coding
TC0100010855.hg.1	4.79	6.42	-3.08	NPL	N-acetylneuraminate pyruvate lyase (dihydrodipicolinate synthase)	Multiple_Complex
TC0100015116.hg.1	3.84	5.46	-3.08	buporbo	Transcript Identified by AceView	Coding
TC0100010245.hg.1	3.75	5.37	-3.08			NonCoding
TC0X00010412.hg.1	3.19	4.81	-3.08	LL0XNC01-105G4.3		Multiple_Complex
TC0100009930.hg.1	2.98	4.61	-3.08	seykarbo	Transcript Identified by AceView	Unassigned
TC0400007017.hg.1	2.7	4.33	-3.08	SLIT2	Jeck2013 ALT_ACCEPTOR, ALT_DONOR, coding, INTERNAL, intronic best transcript NM_004787	NonCoding
TC1700008263.hg.1	14.72	16.33	-3.07	ABCC3	ATP binding cassette subfamily C member 3	Multiple_Complex
TC0100010347.hg.1	12.44	14.06	-3.07	SDHC	succinate dehydrogenase complex, subunit C, integral membrane protein, 15kDa	Multiple_Complex
TC1500008936.hg.1	12.14	13.76	-3.07	RP11-632K20.8		Multiple_Complex
TC0700007352.hg.1	10.05	11.67	-3.07	BLVRA	biliverdin reductase A	Multiple_Complex
TC1600010861.hg.1	8.8	10.42	-3.07	FA2H	fatty acid 2-hydroxylase	Multiple_Complex
TC1100009884.hg.1	8.4	10.02	-3.07	TRIM68	tripartite motif containing 68	Multiple_Complex
TC1600009162.hg.1	6.29	7.91	-3.07	HCFC1R1	host cell factor C1 regulator 1 (XPO1 dependent)	Multiple_Complex
TC1500008868.hg.1	5.79	7.41	-3.07	smeeglee	Transcript Identified by AceView	Unassigned
TC0300013113.hg.1	4.54	6.16	-3.07	borkybu	Transcript Identified by AceView	Unassigned
TC1800006806.hg.1	3.48	5.1	-3.07	ANKRD30B	ankyrin repeat domain 30B	Multiple_Complex
TC0400012290.hg.1	3.34	4.96	-3.07			NonCoding
TC1200012714.hg.1	12.91	14.53	-3.06	HSPB8	heat shock 22kDa protein 8	Multiple_Complex
TC0900008463.hg.1	12.08	13.69	-3.06	HSDL2	hydroxysteroid dehydrogenase like 2	Multiple_Complex
TC0900006758.hg.1	10.5	12.11	-3.06	DENND4C	DENN/MADD domain containing 4C	Multiple_Complex
TC1500006946.hg.1	7.68	9.3	-3.06	INAFM2	InaF-motif containing 2	Multiple_Complex
TC0200012776.hg.1	7.35	8.96	-3.06	TMEM17	transmembrane protein 17	Multiple_Complex
TC1100013019.hg.1	6.73	8.34	-3.06			NonCoding
TC0100012569.hg.1	5.33	6.94	-3.06			NonCoding
TC0400007712.hg.1	4.75	6.37	-3.06	beegly	Transcript Identified by AceView	Unassigned
TC0600013877.hg.1	3.98	5.59	-3.06			NonCoding
TC0100010520.hg.1	3.7	5.32	-3.06	feekloy	Transcript Identified by AceView	Unassigned
TC2200007157.hg.1	3.26	4.87	-3.06	RP1-302D9.3	novel transcript, antisense to LARGE	NonCoding
TC1500010657.hg.1	3.25	4.86	-3.06	jawswaw	Transcript Identified by AceView	Unassigned
TC0900007498.hg.1	2.33	3.95	-3.06	peelar	Transcript Identified by AceView	Unassigned
TC0900012212.hg.1	9.22	10.82	-3.05	PLIN2	perilipin 2	Multiple_Complex
TC0500012028.hg.1	5.59	7.2	-3.05	SHROOM1	shroom family member 1	Multiple_Complex
TC0400011387.hg.1	5.52	7.14	-3.05	nawglu	Transcript Identified by AceView	Unassigned
TC1100007730.hg.1	4.96	6.58	-3.05	bleyspoyby	Transcript Identified by AceView	Coding
TC1100013022.hg.1	16.13	17.73	-3.04	FADS2	fatty acid desaturase 2	Multiple_Complex
TC0400012780.hg.1	13.05	14.66	-3.04	PI4K2B	phosphatidylinositol 4-kinase type 2 beta	Multiple_Complex
TC0100007331.hg.1	10.72	12.33	-3.04	TCEB3	transcription elongation factor B (SIII), polypeptide 3 (110kDa, elongin A)	Multiple_Complex
TC1200009883.hg.1	9.96	11.56	-3.04	CLEC2A	C-type lectin domain family 2, member A	Coding
TC2200007196.hg.1	9.08	10.69	-3.04	TOM1	target of myb1 membrane trafficking protein	Multiple_Complex
TC1100010038.hg.1	6.48	8.08	-3.04	ST5	suppression of tumorigenicity 5	Multiple_Complex
TC1100010982.hg.1	4.27	5.88	-3.04	blumor	Transcript Identified by AceView	Unassigned
TC1200006823.hg.1	3.88	5.48	-3.04			NonCoding
TC1100011057.hg.1	3.81	5.41	-3.04			NonCoding
TC1200008175.hg.1	3.39	4.99	-3.04			NonCoding
TC0200015094.hg.1	3.32	4.93	-3.04			NonCoding
TC1300007204.hg.1	3.25	4.86	-3.04	seeshobu	Transcript Identified by AceView	Coding
TC2000007952.hg.1	3.21	4.81	-3.04			NonCoding
TC0100011520.hg.1	12.78	14.38	-3.03	PPP2R5A	protein phosphatase 2, regulatory subunit B, alpha	Multiple_Complex
TC1600008943.hg.1	12.64	14.24	-3.03	TMEM8A	transmembrane protein 8A	Multiple_Complex
TC1500010724.hg.1	10.54	12.14	-3.03	GANC	glucosidase, alpha; neutral C	Multiple_Complex
TC1700010604.hg.1	9.65	11.25	-3.03	NR1D1	nuclear receptor subfamily 1, group D, member 1	Multiple_Complex
TC1200011474.hg.1	8.81	10.41	-3.03	ATP2B1	ATPase, Ca++ transporting, plasma membrane 1	Multiple_Complex
TC1200008266.hg.1	6.85	8.45	-3.03	dugla	Transcript Identified by AceView	Coding
TC0400009069.hg.1	4.83	6.43	-3.03	keeswubu	Transcript Identified by AceView	Coding
TC1700006752.hg.1	4.36	5.96	-3.03	lorvawbu	Transcript Identified by AceView	Unassigned
TC1400010727.hg.1	4.05	5.65	-3.03	RIPK3	receptor-interacting serine-threonine kinase 3	Multiple_Complex
TC0100011419.hg.1	14.36	15.96	-3.02	CD46	CD46 molecule, complement regulatory protein	Multiple_Complex
TC1500010251.hg.1	12.43	14.02	-3.02	HOMER2	homer scaffolding protein 2	Multiple_Complex
TC1700011437.hg.1	6.18	7.78	-3.02	speysa	Transcript Identified by AceView	Unassigned
TC1600010491.hg.1	5	6.6	-3.02	SNORA46	small nucleolar RNA, H/ACA box 46	Small_RNA
TC0300011417.hg.1	4.46	6.06	-3.02	Y_RNA	Y RNA [Source:RFAM;Acc:RF00019]	NonCoding
TC0200007976.hg.1	4.43	6.03	-3.02	ATP6V1B1	ATPase, H+ transporting, lysosomal 56/58kDa, V1 subunit B1	Multiple_Complex
TC2200007576.hg.1	3.72	5.31	-3.02	PARVG	parvin, gamma	Multiple_Complex
TC0200008897.hg.1	3.64	5.23	-3.02	rini	Transcript Identified by AceView	Coding
TC2000008587.hg.1	10.62	12.2	-3.01	RALGAPA2	Ral GTPase activating protein, alpha subunit 2 (catalytic)	Multiple_Complex
TC1200012706.hg.1	9.73	11.31	-3.01	ACAD10	acyl-CoA dehydrogenase family, member 10	Multiple_Complex
TC1700009113.hg.1	8.48	10.07	-3.01	GAA	glucosidase, alpha; acid	Multiple_Complex
TC1600007515.hg.1	8.05	9.64	-3.01	RP11-196G11.4	novel transcript	NonCoding
TC0X00010017.hg.1	6.14	7.73	-3.01	LOC100132741; LINC00891	uncharacterized LOC100132741; Homo sapiens long intergenic non-protein coding RNA 891 (LINC00891), long non-coding RNA.	NonCoding
TC1600008015.hg.1	4.96	6.55	-3.01	LOC388282; CTD-2600O9.1	uncharacterized LOC388282; novel transcript	Multiple_Complex
TC0700008267.hg.1	4.88	6.47	-3.01	derkar; AC003991.3	Transcript Identified by AceView; novel transcript, antisense to STEAP4	NonCoding
TC1200008908.hg.1	4.13	5.72	-3.01	jabyby	Transcript Identified by AceView	Unassigned
TC2000008949.hg.1	3.47	5.06	-3.01	doyvoy	Transcript Identified by AceView	Unassigned
TC1100007086.hg.1	3.36	4.95	-3.01			NonCoding
TC1000007360.hg.1	3.18	4.77	-3.01			NonCoding
TC0700008312.hg.1	2.99	4.57	-3.01	junuby	Transcript Identified by AceView	Coding
TC1500006723.hg.1	11.79	13.37	-3	GOLGA8Q	golgin A8 family, member Q	Multiple_Complex
TC0900012139.hg.1	11.04	12.63	-3	PGM5	phosphoglucomutase 5	Multiple_Complex
TC0400012781.hg.1	8.11	9.7	-3	STIM2	stromal interaction molecule 2	NonCoding
TC0200014414.hg.1	6.39	7.98	-3	CXCR4	chemokine (C-X-C motif) receptor 4	Multiple_Complex
TC1000008046.hg.1	5.67	7.26	-3	FUT11	fucosyltransferase 11 (alpha (1,3) fucosyltransferase)	Multiple_Complex
TC1200010133.hg.1	5.13	6.72	-3	SOX5	Transcript Identified by AceView, Entrez Gene ID(s) 6660	Unassigned
TC1100010096.hg.1	4.4	5.98	-3	snerglor	Transcript Identified by AceView	Unassigned
TC0300007611.hg.1	3.29	4.88	-3			NonCoding
TC0900007492.hg.1	2.62	4.2	-3	PIP5K1B	Transcript Identified by AceView, Entrez Gene ID(s) 8395	Unassigned
TC1100011888.hg.1	14.94	16.52	-2.99	CTSC	cathepsin C	Multiple_Complex
TC0200007032.hg.1	12.51	14.09	-2.99	HADHB	hydroxyacyl-CoA dehydrogenase/3-ketoacyl-CoA thiolase/enoyl-CoA hydratase (trifunctional protein), beta subunit	Multiple_Complex
TC1900008435.hg.1	11.43	13.01	-2.99	SEPW1	selenoprotein W, 1	Multiple_Complex
TC0900008515.hg.1	11.17	12.75	-2.99	ATP6V1G1	ATPase, H+ transporting, lysosomal 13kDa, V1 subunit G1	Multiple_Complex
TC0400009765.hg.1	10.7	12.27	-2.99	MXD4; MIR4800	MAX dimerization protein 4; microRNA 4800	Multiple_Complex
TC0100009271.hg.1	6	7.59	-2.99	yoreha	Transcript Identified by AceView	Coding
TC1100012923.hg.1	5.48	7.06	-2.99			NonCoding
TC0X00010285.hg.1	5.27	6.85	-2.99			NonCoding
TC0200009383.hg.1	4.28	5.87	-2.99	snarnerbo	Transcript Identified by AceView	Unassigned
TC1100012977.hg.1	4.17	5.74	-2.99			NonCoding
TC0800010418.hg.1	3.04	4.62	-2.99	gygey	Transcript Identified by AceView	Unassigned
TC1800009046.hg.1	2.88	4.46	-2.99			NonCoding
TC0400007799.hg.1	11.61	13.19	-2.98	SLC4A4	solute carrier family 4 (sodium bicarbonate cotransporter), member 4	Multiple_Complex
TC0400011730.hg.1	10.93	12.5	-2.98			NonCoding
TC2200009230.hg.1	8.78	10.35	-2.98	SLC2A11	solute carrier family 2 (facilitated glucose transporter), member 11	Multiple_Complex
TC0500009349.hg.1	7.39	8.97	-2.98	sweeskawby	Transcript Identified by AceView	Coding
TC1200008467.hg.1	5.04	6.62	-2.98	faney	Transcript Identified by AceView	Unassigned
TC0200009872.hg.1	4.67	6.24	-2.98	zeekla	Transcript Identified by AceView	Unassigned
TC0300013074.hg.1	3.61	5.18	-2.98	pergubo	Transcript Identified by AceView	Unassigned
TC0200011608.hg.1	3.48	5.06	-2.98			NonCoding
TC1200007011.hg.1	3.45	5.03	-2.98	RP11-282K24.3	novel transcript	NonCoding
TC0100009365.hg.1	15.66	17.23	-2.97	AHCYL1	adenosylhomocysteinase like 1	Multiple_Complex
TC0300008242.hg.1	13.69	15.26	-2.97	ALCAM	activated leukocyte cell adhesion molecule	Multiple_Complex
TC1900006524.hg.1	12.12	13.69	-2.97	CIRBP	cold inducible RNA binding protein	Multiple_Complex
TC1700012120.hg.1	8.06	9.63	-2.97	OGFOD3	2-oxoglutarate and iron-dependent oxygenase domain containing 3	Multiple_Complex
TC0100013549.hg.1	6.57	8.14	-2.97	SNORD103A; SNORD103B	small nucleolar RNA, C/D box 103A; small nucleolar RNA, C/D box 103B	Small_RNA
TC0100013550.hg.1	6.57	8.14	-2.97	SNORD103A; SNORD103B	Homo sapiens small nucleolar RNA, C/D box 103A (SNORD103A), small nucleolar RNA.; Homo sapiens small nucleolar RNA, C/D box 103B (SNORD103B), small nucleolar RNA.	Multiple_Complex
TC0100015336.hg.1	6.3	7.87	-2.97	BCL2L15	BCL2-like 15	Multiple_Complex
TC1600007927.hg.1	5.96	7.53	-2.97	IRX6	iroquois homeobox 6	Multiple_Complex
TC0800009283.hg.1	4.93	6.5	-2.97			NonCoding
TC1700010177.hg.1	4.34	5.91	-2.97			NonCoding
TC1200010196.hg.1	4.31	5.88	-2.97	bluchoyby	Transcript Identified by AceView	Unassigned
TC2000007815.hg.1	3.02	4.59	-2.97	RP11-380D15.2		Multiple_Complex
TC1600006802.hg.1	2.42	3.99	-2.97	nerney	Transcript Identified by AceView	Coding
TC0100010518.hg.1	12.3	13.86	-2.96	DCAF6	DDB1 and CUL4 associated factor 6	Multiple_Complex
TC1200011719.hg.1	11.61	13.18	-2.96	CCDC53	coiled-coil domain containing 53	Multiple_Complex
TC0500013219.hg.1	11.49	13.05	-2.96	HSD17B4	hydroxysteroid (17-beta) dehydrogenase 4	Multiple_Complex
TC0300007117.hg.1	7.91	9.48	-2.96	ENTPD3	ectonucleoside triphosphate diphosphohydrolase 3	Coding
TC0500009870.hg.1	7.88	9.44	-2.96	AC091849.1		Precursor_microRNA
TC1100006861.hg.1	7.84	9.4	-2.96	gleykeyby	Transcript Identified by AceView	Unassigned
TC1600010317.hg.1	4.28	5.85	-2.96	jorsno	Transcript Identified by AceView	Coding
TC1800008723.hg.1	3.9	5.47	-2.96	RP11-671P2.1; snosu	novel transcript, antisense to DCC; Transcript Identified by AceView	Multiple_Complex
TC0400007911.hg.1	3.63	5.2	-2.96			NonCoding
TC0200007992.hg.1	3.26	4.83	-2.96	woyklar	Transcript Identified by AceView	Unassigned
TC1800008285.hg.1	12.94	14.5	-2.95	NPC1	Niemann-Pick disease, type C1	Multiple_Complex
TC1200009071.hg.1	12.37	13.94	-2.95	PEBP1	phosphatidylethanolamine binding protein 1	Multiple_Complex
TC0X00010837.hg.1	10.4	11.96	-2.95	MBNL3	muscleblind-like splicing regulator 3	Multiple_Complex
TC1400007500.hg.1	9.35	10.91	-2.95	ARG2	arginase 2	Multiple_Complex
TC1700006611.hg.1	6.12	7.68	-2.95	CYB5D2	cytochrome b5 domain containing 2	Multiple_Complex
TC0700008386.hg.1	5.94	7.5	-2.95	GS1-293C5.1	novel transcript antisense to PON2	NonCoding
TC0300008472.hg.1	5.73	7.29	-2.95	tisore	Transcript Identified by AceView	Unassigned
TC1100013133.hg.1	4.86	6.42	-2.95	HBG2; HBG1	hemoglobin, gamma G; hemoglobin, gamma A	Multiple_Complex
TC1000008881.hg.1	8.56	10.12	-2.94	MXI1	MAX interactor 1, dimerization protein	Multiple_Complex
TC0300013702.hg.1	7.54	9.1	-2.94	AC117490.2		Multiple_Complex
TC1700007949.hg.1	6.79	8.35	-2.94	ARL4D	ADP-ribosylation factor like GTPase 4D	Coding
TC1400010781.hg.1	6.79	8.34	-2.94			NonCoding
TC1600007170.hg.1	5.27	6.83	-2.94	CTB-31N19.3	novel transcript sense intronic to METTL9	NonCoding
TC0100009845.hg.1	5.06	6.62	-2.94			NonCoding
TC0500008438.hg.1	4.77	6.32	-2.94	teyslawby	Transcript Identified by AceView	Coding
TC0300012133.hg.1	4.54	6.1	-2.94	seybawbu	Transcript Identified by AceView	Coding
TC0400006860.hg.1	4.28	5.83	-2.94	RP11-448G15.1	putative novel transcript, antisense to SLC2A9	NonCoding
TC0900010487.hg.1	4.19	5.75	-2.94	slarplorbu	Transcript Identified by AceView	Unassigned
TC0100014936.hg.1	3.91	5.47	-2.94	chawybo	Transcript Identified by AceView	Coding
TC0400010605.hg.1	3.79	5.35	-2.94			NonCoding
TC1200010419.hg.1	3.54	5.1	-2.94	RP11-476D10.1	novel transcript	NonCoding
TC0X00009714.hg.1	3.01	4.56	-2.94	RP11-651H2.1		Multiple_Complex
TC1500010815.hg.1	7.77	9.32	-2.93			NonCoding
TC1900009240.hg.1	6.14	7.69	-2.93	GNG7	guanine nucleotide binding protein (G protein), gamma 7	Coding
TC1600008496.hg.1	5.78	7.33	-2.93	NUDT7	nudix hydrolase 7	Multiple_Complex
TC0500009821.hg.1	4.92	6.46	-2.93			NonCoding
TC1300008198.hg.1	3.58	5.14	-2.93			NonCoding
TC1300008625.hg.1	2.62	4.17	-2.93	NDE1P2	nudE neurodevelopment protein 1 pseudogene 2 [Source:HGNC Symbol;Acc:HGNC:49116]	Multiple_Complex
TC1100010391.hg.1	14.14	15.68	-2.92	MUC15	mucin 15, cell surface associated	Coding
TC1100007948.hg.1	11.68	13.22	-2.92	PRDX5	peroxiredoxin 5	Coding
TC0500009864.hg.1	10.79	12.33	-2.92	swoyslabu	Transcript Identified by AceView	Coding
TC0900009335.hg.1	10.61	12.16	-2.92	fleewarby; rawswey	Transcript Identified by AceView	Coding
TC1900012016.hg.1	8.86	10.4	-2.92	ETFB	electron-transfer-flavoprotein, beta polypeptide	Multiple_Complex
TC1300007845.hg.1	5.73	7.27	-2.92	CLYBL	citrate lyase beta like	Multiple_Complex
TC0700012735.hg.1	5.63	7.17	-2.92	blorkee	Transcript Identified by AceView	Unassigned
TC0800008924.hg.1	4.76	6.3	-2.92			NonCoding
TC1000010102.hg.1	4.4	5.94	-2.92	joymorby	Transcript Identified by AceView	Unassigned
TC0100015969.hg.1	3.85	5.39	-2.92	peeplaw	Transcript Identified by AceView	Unassigned
TC0300011744.hg.1	3.27	4.82	-2.92			NonCoding
TC1100011317.hg.1	2.53	4.07	-2.92	dawnu	Transcript Identified by AceView	Unassigned
TC0200008894.hg.1	12.43	13.97	-2.91	MERTK	MER proto-oncogene, tyrosine kinase	Multiple_Complex
TC1900009481.hg.1	7.37	8.91	-2.91			NonCoding
TC0100009872.hg.1	6.22	7.76	-2.91	choypabu	Transcript Identified by AceView	Unassigned
TC0100007144.hg.1	5.96	7.5	-2.91	KLHDC7A	kelch domain containing 7A	Multiple_Complex
TC0900011076.hg.1	4	5.54	-2.91	plylo	Transcript Identified by AceView	Coding
TC0300010619.hg.1	4	5.54	-2.91			NonCoding
TC1100012037.hg.1	10.08	11.61	-2.9	MAML2	mastermind-like transcriptional coactivator 2	Multiple_Complex
TC0600010241.hg.1	6.17	7.71	-2.9	KIF25	kinesin family member 25	Multiple_Complex
TC0X00007617.hg.1	5.96	7.49	-2.9	TSIX	TSIX transcript, XIST antisense RNA	NonCoding
TC1200008630.hg.1	5.38	6.91	-2.9	fycho	Transcript Identified by AceView	Unassigned
TC1100010230.hg.1	4.76	6.3	-2.9	AC116533.4		Precursor_microRNA
TC0300013578.hg.1	4.74	6.28	-2.9			NonCoding
TC0200013628.hg.1	3.62	5.15	-2.9	sherjybu	Transcript Identified by AceView	Coding
TC0300007551.hg.1	2.55	4.09	-2.9			NonCoding
TC0100015895.hg.1	12.63	14.16	-2.89	RAB13	RAB13, member RAS oncogene family	Multiple_Complex
TC2200007477.hg.1	12.1	13.63	-2.89	ACO2	aconitase 2, mitochondrial	Multiple_Complex
TC1100010051.hg.1	12.08	13.61	-2.89	TMEM9B	TMEM9 domain family, member B	Multiple_Complex
TC0900009470.hg.1	11.77	13.3	-2.89	ERMP1	endoplasmic reticulum metallopeptidase 1	Multiple_Complex
TC0900010123.hg.1	7.94	9.47	-2.89	PGM5P2	phosphoglucomutase 5 pseudogene 2	NonCoding
TC0100013928.hg.1	7.47	9	-2.89	HYI	hydroxypyruvate isomerase (putative)	Multiple_Complex
TC1600006539.hg.1	6.93	8.46	-2.89	GNPTG	N-acetylglucosamine-1-phosphate transferase, gamma subunit	Multiple_Complex
TC1600010635.hg.1	6.28	7.8	-2.89	fluraw	Transcript Identified by AceView	Coding
TC1700010973.hg.1	6.2	7.73	-2.89	COPZ2	coatomer protein complex subunit zeta 2	Multiple_Complex
TC0100012379.hg.1	4.77	6.3	-2.89	PGBD2	piggyBac transposable element derived 2	Multiple_Complex
TC0400008021.hg.1	4.3	5.83	-2.89	parswuby	Transcript Identified by AceView	Unassigned
TC1400009151.hg.1	3.77	5.3	-2.89	TRIM9	tripartite motif containing 9	Multiple_Complex
TC0700008268.hg.1	3.69	5.21	-2.89			NonCoding
TC1000008373.hg.1	3.61	5.15	-2.89			NonCoding
TSUnmapped00000531.hg.1	3.57	5.1	-2.89	RASA3	RAS p21 protein activator 3	Coding
TC0700007392.hg.1	12.72	14.24	-2.88	OGDH	oxoglutarate (alpha-ketoglutarate) dehydrogenase (lipoamide)	Multiple_Complex
TC1600007918.hg.1	8.44	9.97	-2.88	IRX5	iroquois homeobox 5	Coding
TC0200009452.hg.1	7.32	8.84	-2.88	DARS-AS1	DARS antisense RNA 1	Multiple_Complex
TC1100008076.hg.1	7.3	8.82	-2.88	RP11-867G23.8	novel transcript, antisense to SLC29A2	NonCoding
TC2100007048.hg.1	4.64	6.17	-2.88	lersobo	Transcript Identified by AceView	Coding
TC0200012609.hg.1	3.95	5.48	-2.88	rorkly	Transcript Identified by AceView	Unassigned
TC1100010639.hg.1	11.67	13.19	-2.87	TP53I11	tumor protein p53 inducible protein 11	Multiple_Complex
TC0200010337.hg.1	8.11	9.63	-2.87	LOC101927482; AC020571.3	uncharacterized LOC101927482; novel transcript, antisense to HECW2	NonCoding
TC0200013868.hg.1	8.1	9.62	-2.87	AC112229.1		Multiple_Complex
TC0500009862.hg.1	5.82	7.34	-2.87	bloystyby	Transcript Identified by AceView	Unassigned
TC1400007951.hg.1	5.09	6.61	-2.87	shopar	Transcript Identified by AceView	Unassigned
TC1800006850.hg.1	4.88	6.4	-2.87	RP11-595B24.2	novel transcript	NonCoding
TC1100006585.hg.1	4.54	6.06	-2.87	KCNQ1OT1_5	KCNQ1 overlapping transcript 1 conserved region 5 [Source:RFAM;Acc:RF01950]	NonCoding
TC1800008980.hg.1	4.53	6.05	-2.87			NonCoding
TC0600011516.hg.1	3.41	4.93	-2.87	HLA-DOA	major histocompatibility complex, class II, DO alpha	Multiple_Complex
TC0100010610.hg.1	3.39	4.92	-2.87			NonCoding
TC0800011495.hg.1	3.12	4.64	-2.87	spowybu	Transcript Identified by AceView	Coding
TC0200010009.hg.1	11.15	12.67	-2.86	SCRN3	secernin 3	Multiple_Complex
TC0200016471.hg.1	7.26	8.78	-2.86	MXD1	MAX dimerization protein 1	Multiple_Complex
TC0X00009088.hg.1	4.6	6.12	-2.86			NonCoding
TC0200008111.hg.1	4.56	6.07	-2.86	flarvorbo	Transcript Identified by AceView	Coding
TC1600008169.hg.1	3.9	5.42	-2.86	PARD6A	par-6 family cell polarity regulator alpha	Multiple_Complex
TC1100010057.hg.1	3.77	5.29	-2.86			NonCoding
TC0900007378.hg.1	2.89	4.4	-2.86	zawskubu	Transcript Identified by AceView	Unassigned
TC0100014247.hg.1	11.81	13.32	-2.85	HSPB11	heat shock protein family B (small), member 11	Multiple_Complex
TC1500008187.hg.1	10.97	12.48	-2.85	AKAP13; MIR7706	A kinase (PRKA) anchor protein 13; microRNA 7706	Multiple_Complex
TC1500008995.hg.1	10.11	11.62	-2.85	GOLGA8B	golgin A8 family, member B	Multiple_Complex
TC0X00011102.hg.1	8.66	10.17	-2.85	CD99L2	CD99 molecule-like 2	Multiple_Complex
TC1400006754.hg.1	5.81	7.31	-2.85	AL137164.1		Coding
TC1000012146.hg.1	4.76	6.27	-2.85			NonCoding
TC0X00007243.hg.1	4.34	5.85	-2.85	AC231645.1		Multiple_Complex
TC0400007385.hg.1	4.18	5.69	-2.85	RP11-324J13.3		Pseudogene
TC0500008484.hg.1	3.94	5.45	-2.85	konome	Transcript Identified by AceView	Unassigned
TC0900008307.hg.1	3.44	4.95	-2.85	waswa	Transcript Identified by AceView	Coding
TC0400008628.hg.1	12.99	14.49	-2.84	SPRY1	sprouty RTK signaling antagonist 1	Multiple_Complex
TC1200009881.hg.1	11.62	13.12	-2.84	CLEC2B	C-type lectin domain family 2, member B	Multiple_Complex
TC1900011653.hg.1	10.16	11.66	-2.84	MCOLN1	mucolipin 1	Multiple_Complex
TC1100007467.hg.1	9.81	11.31	-2.84	C11orf49	chromosome 11 open reading frame 49	Multiple_Complex
TC1500010806.hg.1	6.71	8.22	-2.84			NonCoding
TC1500010808.hg.1	6.2	7.7	-2.84			NonCoding
TC1700011562.hg.1	5.38	6.89	-2.84	MIR635	microRNA 635	Precursor_microRNA
TC0500007509.hg.1	4.8	6.3	-2.84			NonCoding
TC0900008205.hg.1	3.53	5.04	-2.84			NonCoding
TC0700009012.hg.1	3.44	4.94	-2.84			NonCoding
TC0100007932.hg.1	3.23	4.74	-2.84			NonCoding
TSUnmapped00000374.hg.1	11.43	12.93	-2.83	DUSP16	dual specificity phosphatase 16	Coding
TC0X00008871.hg.1	6.87	8.37	-2.83	RP13-228J13.5		Multiple_Complex
TC0700012179.hg.1	4.83	6.33	-2.83			NonCoding
TC0100015112.hg.1	4.43	5.93	-2.83	choynoybu	Transcript Identified by AceView	Unassigned
TC0X00010419.hg.1	4.21	5.71	-2.83			NonCoding
TC0100009842.hg.1	4.18	5.69	-2.83	toroha	Transcript Identified by AceView	Unassigned
TC2200007261.hg.1	3.76	5.26	-2.83			NonCoding
TC1900007944.hg.1	2.43	3.93	-2.83			NonCoding
TC0X00008798.hg.1	11.85	13.34	-2.82	SSR4	signal sequence receptor, delta	Multiple_Complex
TC1100007899.hg.1	10.83	12.33	-2.82	RARRES3	retinoic acid receptor responder (tazarotene induced) 3	Multiple_Complex
TC0100007879.hg.1	7.76	9.26	-2.82	mekomo	Transcript Identified by AceView	Unassigned
TC0100008033.hg.1	7.67	9.16	-2.82	ERMAP	erythroblast membrane-associated protein (Scianna blood group)	Multiple_Complex
TC1000008749.hg.1	7.49	8.99	-2.82	SFXN2	sideroflexin 2	Multiple_Complex
TC1300008085.hg.1	6.49	7.98	-2.82	shupa	Transcript Identified by AceView	Coding
TC1000012321.hg.1	6.26	7.76	-2.82			NonCoding
TC2000007193.hg.1	6.23	7.72	-2.82	MAP1LC3A	microtubule-associated protein 1 light chain 3 alpha	Multiple_Complex
TC0300008928.hg.1	5.24	6.73	-2.82	SOX14	SRY box 14	Coding
TC0500012347.hg.1	4.88	6.37	-2.82	RNU7-156P	RNA, U7 small nuclear 156 pseudogene [Source:HGNC Symbol;Acc:HGNC:45690]	Small_RNA
TC1200012112.hg.1	4.58	6.07	-2.82	smeygoyby	Transcript Identified by AceView	Unassigned
TC0100013112.hg.1	3.66	5.15	-2.82			NonCoding
TC0600010462.hg.1	3.33	4.82	-2.82	bleestaby	Transcript Identified by AceView	Unassigned
TC1500007801.hg.1	3.3	4.8	-2.82			NonCoding
TC0100013895.hg.1	2.94	4.44	-2.82			NonCoding
TC2200008226.hg.1	12.06	13.55	-2.81	GUCD1	guanylyl cyclase domain containing 1	Multiple_Complex
TC1600007007.hg.1	11.08	12.57	-2.81	PDXDC1	pyridoxal-dependent decarboxylase domain containing 1	Multiple_Complex
TC1700009406.hg.1	11.05	12.54	-2.81	AC016292.3		Pseudogene
TC1700006729.hg.1	9.6	11.09	-2.81	ACADVL	acyl-CoA dehydrogenase, very long chain	Multiple_Complex
TC1700009150.hg.1	9.44	10.93	-2.81	BAIAP2	BAI1-associated protein 2	Multiple_Complex
TC0100014533.hg.1	6.08	7.57	-2.81	klawporbu	Transcript Identified by AceView	Unassigned
TC1600007377.hg.1	5.01	6.5	-2.81	swoyflo	Transcript Identified by AceView	Coding
TC1300008937.hg.1	4.79	6.28	-2.81	spysheybu	Transcript Identified by AceView	Unassigned
TC0600008204.hg.1	4.73	6.22	-2.81			NonCoding
TC1500007662.hg.1	4.35	5.84	-2.81	marster	Transcript Identified by AceView	Unassigned
TC0800010927.hg.1	3.56	5.05	-2.81	rinomu	Transcript Identified by AceView	Coding
TC0800011677.hg.1	3.49	4.98	-2.81	stawskerbu	Transcript Identified by AceView	Unassigned
TC1000008378.hg.1	3.25	4.74	-2.81	LIPF	lipase, gastric	Multiple_Complex
TC1800008731.hg.1	3.13	4.62	-2.81	parploy	Transcript Identified by AceView	Unassigned
TC1300009727.hg.1	3.07	4.56	-2.81			NonCoding
TC1400008355.hg.1	10.53	12.01	-2.8	RCOR1	REST corepressor 1	Multiple_Complex
TC0200012009.hg.1	9.58	11.06	-2.8	DTNB	dystrobrevin beta	Multiple_Complex
TC0500010842.hg.1	8.35	9.83	-2.8	PDE4D	phosphodiesterase 4D, cAMP-specific	Multiple_Complex
TC1900007382.hg.1	7.22	8.7	-2.8	PGPEP1	pyroglutamyl-peptidase I	Multiple_Complex
TC1400006529.hg.1	7.08	8.56	-2.8	ANG; RNASE4	angiogenin, ribonuclease, RNase A family, 5; ribonuclease, RNase A family, 4	Multiple_Complex
TC0700008361.hg.1	4.61	6.09	-2.8	peekar	Transcript Identified by AceView	Coding
TC0X00009246.hg.1	4.36	5.84	-2.8			NonCoding
TC1000008374.hg.1	3.32	4.8	-2.8			NonCoding
TC1100013010.hg.1	3.17	4.66	-2.8	GLYATL1P4	glycine-N-acyltransferase-like 1 pseudogene 4	Pseudogene
TC0400007869.hg.1	3.02	4.51	-2.8	tarbabo	Transcript Identified by AceView	Coding
TC1300007931.hg.1	2.51	4	-2.8			NonCoding
TC0100018242.hg.1	12.71	14.19	-2.79	HS2ST1	heparan sulfate 2-O-sulfotransferase 1	Coding
TC1900009445.hg.1	10.95	12.43	-2.79	GPR108; MIR6791	G protein-coupled receptor 108; microRNA 6791	Multiple_Complex
TC1500008893.hg.1	10.58	12.06	-2.79	MTMR10	myotubularin related protein 10	Multiple_Complex
TC0500011369.hg.1	9.7	11.18	-2.79	AC026700.1		Precursor_microRNA
TC0100018473.hg.1	9.18	10.66	-2.79	SEC22B	Salzman2013 ALT_ACCEPTOR, CDS, coding, INTERNAL, OVCODE, OVEXON best transcript NM_004892; Salzman2013 ANNOTATED, CDS, coding, OVCODE, OVEXON, UTR3 best transcript NM_004892	Multiple_Complex
TC0600008601.hg.1	7.07	8.55	-2.79	IRAK1BP1	interleukin 1 receptor associated kinase 1 binding protein 1	Multiple_Complex
TC1500010763.hg.1	5.55	7.03	-2.79			NonCoding
TC0100006964.hg.1	4.81	6.29	-2.79	rakumo	Transcript Identified by AceView	Unassigned
TC0600012815.hg.1	4.7	6.18	-2.79	PPIL6	peptidylprolyl isomerase (cyclophilin)-like 6	Multiple_Complex
TC0200013579.hg.1	4.66	6.14	-2.79	fleefa	Transcript Identified by AceView	Unassigned
TC1000010504.hg.1	4.34	5.82	-2.79	jarspar	Transcript Identified by AceView	Coding
TC0400007134.hg.1	4.22	5.7	-2.79			NonCoding
TC0600009668.hg.1	3.6	5.08	-2.79			NonCoding
TC1900008241.hg.1	3.57	5.05	-2.79			NonCoding
TC0900010322.hg.1	3.07	4.56	-2.79	TMEM252	transmembrane protein 252	Coding
TC0100008921.hg.1	2.87	4.35	-2.79	CLCA2	chloride channel accessory 2	Multiple_Complex
TC0100011406.hg.1	16.48	17.96	-2.78	CD55	CD55 molecule, decay accelerating factor for complement (Cromer blood group)	Multiple_Complex
TC0100018300.hg.1	9.24	10.72	-2.78	ADAM15	ADAM metallopeptidase domain 15	Multiple_Complex
TC1200012617.hg.1	8.61	10.09	-2.78	FGD4	FYVE, RhoGEF and PH domain containing 4	Multiple_Complex
TC0900008795.hg.1	7.74	9.22	-2.78	RALGPS1	Ral GEF with PH domain and SH3 binding motif 1	Multiple_Complex
TC1900006508.hg.1	7.59	9.07	-2.78	ABCA7	ATP binding cassette subfamily A member 7	Multiple_Complex
TC0300012433.hg.1	6.79	8.27	-2.78	RP11-39E3.4		Multiple_Complex
TC0800011583.hg.1	5.21	6.68	-2.78	slobly	Transcript Identified by AceView	Coding
TC0400010570.hg.1	4.93	6.4	-2.78			NonCoding
TC0300008929.hg.1	4.84	6.32	-2.78	LINC01210	long intergenic non-protein coding RNA 1210	NonCoding
TC2200008189.hg.1	4.83	6.31	-2.78	DERL3	derlin 3	Multiple_Complex
TC1400010013.hg.1	4.57	6.04	-2.78	jartabo	Transcript Identified by AceView	Coding
TC0500010926.hg.1	3.96	5.44	-2.78	jorger	Transcript Identified by AceView	Unassigned
TC1200007354.hg.1	3.82	5.3	-2.78	AC084290.2		Multiple_Complex
TC1700012218.hg.1	3.66	5.13	-2.78	SARM1	sterile alpha and TIR motif containing 1	Multiple_Complex
TC0100016436.hg.1	3.17	4.65	-2.78			NonCoding
TC0400012422.hg.1	3.11	4.59	-2.78			NonCoding
TC2200008467.hg.1	2.49	3.96	-2.78	PLA2G3	phospholipase A2, group III	Coding
TSUnmapped00000107.hg.1	9.52	10.99	-2.77	DUSP16	dual specificity phosphatase 16	Coding
TC0100008496.hg.1	8	9.47	-2.77	FGGY	FGGY carbohydrate kinase domain containing	Multiple_Complex
TC1600010771.hg.1	7.55	9.02	-2.77	spusnee	Transcript Identified by AceView	Unassigned
TC1500010810.hg.1	7.43	8.9	-2.77			NonCoding
TC1400009973.hg.1	6.18	7.65	-2.77	RPS6KA5	ribosomal protein S6 kinase, 90kDa, polypeptide 5	Multiple_Complex
TC0300006785.hg.1	5.93	7.41	-2.77	boydoybo	Transcript Identified by AceView	Unassigned
TC0X00007705.hg.1	5.27	6.73	-2.77	skeybey	Transcript Identified by AceView	Coding
TC0100008502.hg.1	4.89	6.36	-2.77	LOC101926944; RP4-782L23.1	uncharacterized LOC101926944; novel transcript	NonCoding
TC0700012661.hg.1	4.84	6.31	-2.77	ploybler	Transcript Identified by AceView	Unassigned
TC1700010176.hg.1	4.46	5.92	-2.77	CTD-2008P7.8	novel transcript	NonCoding
TC1500008523.hg.1	4.29	5.76	-2.77	darzee	Transcript Identified by AceView	Unassigned
TC0600011735.hg.1	4.15	5.62	-2.77	blarvabo	Transcript Identified by AceView	Unassigned
TC1200010806.hg.1	4.02	5.48	-2.77	MAP3K12	mitogen-activated protein kinase kinase kinase 12	Multiple_Complex
TC0700008032.hg.1	3.44	4.91	-2.77	pleegoy	Transcript Identified by AceView	Unassigned
TC0500012896.hg.1	3.33	4.8	-2.77	perwuby	Transcript Identified by AceView	Unassigned
TC1900007211.hg.1	3.01	4.48	-2.77	AC003956.1	novel transcript, antisense to ILVBL	NonCoding
TC1400006520.hg.1	2.52	3.99	-2.77	lyswer	Transcript Identified by AceView	Unassigned
TC0300010664.hg.1	12.71	14.18	-2.76	GLB1; TMPPE	galactosidase beta 1; transmembrane protein with metallophosphoesterase domain	Multiple_Complex
TC0800007978.hg.1	8.51	9.98	-2.76	LY96	lymphocyte antigen 96	Coding
TC0400011175.hg.1	8.36	9.82	-2.76	TMEM150C	transmembrane protein 150C	Multiple_Complex
TC1600009560.hg.1	7.17	8.63	-2.76	mokari	Transcript Identified by AceView	Unassigned
TC0300012264.hg.1	6.43	7.9	-2.76	ALG1L	ALG1, chitobiosyldiphosphodolichol beta-mannosyltransferase-like	Multiple_Complex
TC0200011878.hg.1	5.6	7.06	-2.76	OSR1	odd-skipped related transciption factor 1	Multiple_Complex
TC1000011836.hg.1	4.19	5.65	-2.76			NonCoding
TC0500012673.hg.1	4.11	5.57	-2.76	GLRXP3	glutaredoxin (thioltransferase) pseudogene 3 [Source:HGNC Symbol;Acc:HGNC:34049]	Pseudogene
TC0300011460.hg.1	3.62	5.09	-2.76	rawpoybu	Transcript Identified by AceView	Coding
TC0200012078.hg.1	12.27	13.73	-2.75	FTH1P3	ferritin, heavy polypeptide 1 pseudogene 3	Multiple_Complex
TC1200007821.hg.1	9.29	10.75	-2.75	SUOX	sulfite oxidase	Multiple_Complex
TC1900009357.hg.1	8.99	10.45	-2.75	MYDGF	myeloid-derived growth factor	Multiple_Complex
TC1900007025.hg.1	8.42	9.88	-2.75	PLPPR2	phospholipid phosphatase related 2	Multiple_Complex
TC0600010021.hg.1	7.86	9.32	-2.75	SYTL3	synaptotagmin-like 3	Multiple_Complex
TSUnmapped00000524.hg.1	5.17	6.63	-2.75	INPP5D	inositol polyphosphate-5-phosphatase D	Coding
TC1200012248.hg.1	5.04	6.5	-2.75	HCAR3	hydroxycarboxylic acid receptor 3	Coding
TC0800009898.hg.1	4.32	5.78	-2.75	ADAM28	Memczak2013 ANTISENSE, coding, INTERNAL, intronic best transcript NM_014265	NonCoding
TC0500011535.hg.1	3.05	4.5	-2.75			NonCoding
TC0100008503.hg.1	11.38	12.83	-2.74	HOOK1	hook microtubule-tethering protein 1	Multiple_Complex
TC0500007590.hg.1	5.19	6.65	-2.74	FAM159B	family with sequence similarity 159, member B	Multiple_Complex
TC0100016152.hg.1	4.72	6.17	-2.74			NonCoding
TC0300011357.hg.1	4.63	6.08	-2.74	wynubo	Transcript Identified by AceView	Coding
TC0400011734.hg.1	4.51	5.97	-2.74			NonCoding
TC0200015706.hg.1	4.47	5.93	-2.74	blugarbu	Transcript Identified by AceView	Coding
TC0100016988.hg.1	4.27	5.72	-2.74	FMOD	fibromodulin	Multiple_Complex
TC2000008669.hg.1	3.64	5.09	-2.74	CST11	cystatin 11	Coding
TC0700012919.hg.1	3.58	5.03	-2.74	nawsmarbu	Transcript Identified by AceView	Unassigned
TC1100011572.hg.1	3.3	4.76	-2.74			NonCoding
TC0400012398.hg.1	2.77	4.22	-2.74			NonCoding
TC0100009097.hg.1	13.16	14.61	-2.73	ABCD3	ATP binding cassette subfamily D member 3	Multiple_Complex
TC1500009429.hg.1	11.26	12.71	-2.73	DMXL2	Dmx-like 2	Multiple_Complex
TC1200006656.hg.1	10.27	11.72	-2.73	C12orf57; RNU7-1	chromosome 12 open reading frame 57; RNA, U7 small nuclear 1	Multiple_Complex
TC0X00011339.hg.1	10.02	11.46	-2.73	ARSE	arylsulfatase E (chondrodysplasia punctata 1)	Multiple_Complex
TC0700011586.hg.1	8.47	9.92	-2.73	GSAP	gamma-secretase activating protein	Multiple_Complex
TC0400007513.hg.1	7.54	8.99	-2.73			NonCoding
TC1400007945.hg.1	6.7	8.15	-2.73	RP11-750I4.2		Multiple_Complex
TC0700011052.hg.1	5.89	7.33	-2.73	DDC	dopa decarboxylase	Multiple_Complex
TC0600013008.hg.1	4.83	6.28	-2.73			NonCoding
TC1600006651.hg.1	4.68	6.13	-2.73	CLDN9	claudin 9	Coding
TC1700011640.hg.1	3.85	5.31	-2.73	zeyvubu	Transcript Identified by AceView	Unassigned
TC1300009876.hg.1	3.8	5.25	-2.73	swoyshoybu	Transcript Identified by AceView	Coding
TC2000007989.hg.1	3.76	5.21	-2.73	swozey	Transcript Identified by AceView	Coding
TC0500011843.hg.1	2.78	4.23	-2.73			NonCoding
TC1200011976.hg.1	2.53	3.98	-2.73	MIR1302-1	microRNA 1302-1	Multiple_Complex
TC0100006469.hg.1	12.37	13.81	-2.72	LINC01128	long intergenic non-protein coding RNA 1128	NonCoding
TC0500010540.hg.1	10.99	12.43	-2.72	LIFR	leukemia inhibitory factor receptor alpha	Multiple_Complex
TC0100018521.hg.1	9.31	10.75	-2.72	TSTD1	thiosulfate sulfurtransferase (rhodanese)-like domain containing 1	Multiple_Complex
TC0100011999.hg.1	8.98	10.42	-2.72	NTPCR	nucleoside-triphosphatase, cancer-related	Multiple_Complex
TC0200016447.hg.1	8.46	9.9	-2.72	ACYP2	acylphosphatase 2, muscle type	Multiple_Complex
TC0100014321.hg.1	6.36	7.81	-2.72	C1orf168	chromosome 1 open reading frame 168	Multiple_Complex
TC1500009499.hg.1	4.45	5.89	-2.72	spyzobu	Transcript Identified by AceView	Unassigned
TC0300012399.hg.1	4.18	5.62	-2.72	serdabo	Transcript Identified by AceView	Coding
TC1300006596.hg.1	4.14	5.58	-2.72	kerzo	Transcript Identified by AceView	Multiple_Complex
TC1900007009.hg.1	3.91	5.36	-2.72	weyflor	Transcript Identified by AceView	Unassigned
TC1600007128.hg.1	3.38	4.82	-2.72			NonCoding
TC0100012220.hg.1	3.3	4.74	-2.72	ramerbu	Transcript Identified by AceView	Unassigned
TC0300012237.hg.1	3.17	4.61	-2.72	steeberbu	Transcript Identified by AceView	Unassigned
TC2000009646.hg.1	14.15	15.59	-2.71	CTSZ	cathepsin Z	Multiple_Complex
TC0500009521.hg.1	10.61	12.05	-2.71	CPEB4	cytoplasmic polyadenylation element binding protein 4	Multiple_Complex
TC0400010256.hg.1	8.48	9.92	-2.71	CCDC149	coiled-coil domain containing 149	Multiple_Complex
TC0200012727.hg.1	8.25	9.69	-2.71	PUS10	pseudouridylate synthase 10	Multiple_Complex
TC0200016418.hg.1	6.57	8.01	-2.71	ZNF512	zinc finger protein 512	Multiple_Complex
TC0600014111.hg.1	6.46	7.89	-2.71	SYNGAP1; MIR5004	synaptic Ras GTPase activating protein 1; microRNA 5004	Multiple_Complex
TC1000010618.hg.1	6.05	7.48	-2.71	sykoybu; terspar	Transcript Identified by AceView	Coding
TC0100017733.hg.1	5.88	7.32	-2.71	TSNAX	Memczak2013 ANTISENSE, CDS, coding, INTERNAL, UTR3 best transcript NM_005999	NonCoding
TC0200014800.hg.1	4.78	6.22	-2.71	SLC38A11	solute carrier family 38, member 11	Multiple_Complex
TC0700012445.hg.1	4.34	5.78	-2.71	rabler	Transcript Identified by AceView	Unassigned
TC1300008593.hg.1	3.85	5.28	-2.71	RP11-266E6.3	novel transcript	NonCoding
TC2200009303.hg.1	3.45	4.89	-2.71	MAPK8IP2	mitogen-activated protein kinase 8 interacting protein 2	Coding
TC0X00007912.hg.1	2.86	4.3	-2.71			NonCoding
TC0600007518.hg.1	11.6	13.04	-2.7	HLA-L	major histocompatibility complex, class I, L (pseudogene)	Multiple_Complex
TC1600008137.hg.1	9.28	10.71	-2.7	CES3; CES2	carboxylesterase 3; carboxylesterase 2	Multiple_Complex
TC0X00007751.hg.1	8.19	9.62	-2.7	glernoy	Transcript Identified by AceView	Unassigned
TC1100011485.hg.1	7.71	9.14	-2.7	SHANK2	SH3 and multiple ankyrin repeat domains 2	Multiple_Complex
TC0500011388.hg.1	4.26	5.7	-2.7	snawja	Transcript Identified by AceView	Coding
TC0X00011150.hg.1	4.23	5.66	-2.7			NonCoding
TC1700011316.hg.1	4.13	5.56	-2.7	larwey	Transcript Identified by AceView	Coding
TC0900010031.hg.1	3.93	5.37	-2.7	MRPS10P5	Transcript Identified by AceView, Entrez Gene ID(s) 359754	Unassigned
TC1100007972.hg.1	2.97	4.41	-2.7			NonCoding
TC1900008258.hg.1	2.93	4.37	-2.7			NonCoding
TC1400009912.hg.1	10.21	11.64	-2.69	GALC	galactosylceramidase	Multiple_Complex
TC0X00011277.hg.1	9.24	10.66	-2.69	CA5B	carbonic anhydrase VB, mitochondrial	Multiple_Complex
TC0X00006957.hg.1	8.67	10.09	-2.69	XK	X-linked Kx blood group	Multiple_Complex
TC2200006614.hg.1	6.71	8.14	-2.69	GP1BB; SEPT5	glycoprotein Ib (platelet), beta polypeptide; septin 5	Multiple_Complex
TC0600010634.hg.1	4.36	5.79	-2.69			NonCoding
TC0300011250.hg.1	4.3	5.72	-2.69	RP11-875H7.5	novel transcript	NonCoding
TC0400010367.hg.1	4.06	5.48	-2.69			NonCoding
TC0100008700.hg.1	3.64	5.06	-2.69			NonCoding
TC0500008110.hg.1	3.08	4.51	-2.69			NonCoding
TC0200009599.hg.1	2.88	4.3	-2.69	blarla	Transcript Identified by AceView	Unassigned
TC1300007913.hg.1	2.86	4.29	-2.69			NonCoding
TC1500010535.hg.1	2.75	4.18	-2.69	LINC01197	long intergenic non-protein coding RNA 1197	NonCoding
TC0500008921.hg.1	13.39	14.81	-2.68	NDFIP1	Nedd4 family interacting protein 1	Multiple_Complex
TC0700013612.hg.1	10.76	12.19	-2.68	NDUFA5	NADH dehydrogenase (ubiquinone) 1 alpha subcomplex, 5	Multiple_Complex
TC0700008786.hg.1	9.51	10.93	-2.68	DNAJB9	DnaJ (Hsp40) homolog, subfamily B, member 9	Multiple_Complex
TC0700008552.hg.1	9.04	10.47	-2.68	AGFG2	ArfGAP with FG repeats 2	Multiple_Complex
TC1200007029.hg.1	8.27	9.69	-2.68	RP11-405A12.2	novel transcript	NonCoding
TC1900011084.hg.1	8.19	9.62	-2.68	DBP	D site of albumin promoter (albumin D-box) binding protein	Multiple_Complex
TC2000007197.hg.1	5.35	6.77	-2.68	TP53INP2	tumor protein p53 inducible nuclear protein 2	Multiple_Complex
TC1000007565.hg.1	4.64	6.06	-2.68	neymar	Transcript Identified by AceView	Coding
TC0400010678.hg.1	4.39	5.81	-2.68			NonCoding
TC0X00006486.hg.1	4.26	5.68	-2.68	ARSD-AS1; RP4-617A9.4	ARSD antisense RNA 1 [Source:HGNC Symbol;Acc:HGNC:40085]; novel transcript	NonCoding
TC1500010638.hg.1	3.94	5.37	-2.68			NonCoding
TC0500011813.hg.1	3.82	5.25	-2.68	reyswarbu	Transcript Identified by AceView	Coding
TC0700006968.hg.1	3.58	5	-2.68			NonCoding
TC0200009760.hg.1	3.15	4.57	-2.68	loydo	Transcript Identified by AceView	Unassigned
TC0300006835.hg.1	2.79	4.21	-2.68	koyomo	Transcript Identified by AceView	Coding
TC0200008293.hg.1	2.73	4.15	-2.68			NonCoding
TC0900009219.hg.1	2.56	3.98	-2.68			NonCoding
TC0600012764.hg.1	13.61	15.03	-2.67	SEC63	SEC63 homolog, protein translocation regulator	Multiple_Complex
TC1600009412.hg.1	12.11	13.53	-2.67	TXNDC11	thioredoxin domain containing 11	Multiple_Complex
TC0400012874.hg.1	9.51	10.93	-2.67	CYP4V2	cytochrome P450, family 4, subfamily V, polypeptide 2	Multiple_Complex
TC1500010672.hg.1	9.25	10.67	-2.67	TARSL2	threonyl-tRNA synthetase-like 2	Multiple_Complex
TC0300012686.hg.1	6.64	8.05	-2.67	SLC9A9	solute carrier family 9, subfamily A (NHE9, cation proton antiporter 9), member 9	Multiple_Complex
TC0800007040.hg.1	6.07	7.49	-2.67	ADAM28	ADAM metallopeptidase domain 28	Multiple_Complex
TC0100013277.hg.1	4.89	6.31	-2.67	RP5-1057J7.7	novel transcript	NonCoding
TC0100013061.hg.1	4.81	6.23	-2.67	MST1L	macrophage stimulating 1-like	Multiple_Complex
TC0X00007525.hg.1	4.4	5.81	-2.67	U3	Small nucleolar RNA U3 [Source:RFAM;Acc:RF00012]	Multiple_Complex
TC0400007001.hg.1	3.91	5.33	-2.67			NonCoding
TC0600009697.hg.1	3.7	5.12	-2.67	PHACTR2	Jeck2013 ALT_ACCEPTOR, ALT_DONOR, coding, INTERNAL, intronic best transcript NM_001100164	NonCoding
TC1000008367.hg.1	3.67	5.09	-2.67			NonCoding
TC2000006926.hg.1	3.38	4.8	-2.67	ST13P	Transcript Identified by AceView, Entrez Gene ID(s) 170553	Unassigned
TC1800009151.hg.1	3.19	4.61	-2.67			NonCoding
TC0500011277.hg.1	3.17	4.59	-2.67	ANKRD34B	ankyrin repeat domain 34B	Coding
TC0X00006919.hg.1	2.72	4.14	-2.67	spamoy	Transcript Identified by AceView	Coding
TC1600010375.hg.1	13.97	15.38	-2.66	CRNDE	colorectal neoplasia differentially expressed (non-protein coding)	Multiple_Complex
TC0X00007267.hg.1	13.44	14.85	-2.66	MAGED1	MAGE family member D1	Multiple_Complex
TC1100013194.hg.1	11.31	12.73	-2.66	CORO1B	coronin, actin binding protein, 1B	Multiple_Complex
TC0700011344.hg.1	10.75	12.16	-2.66	GUSB	glucuronidase, beta	Multiple_Complex
TC1200008016.hg.1	10.23	11.64	-2.66	TBC1D30	TBC1 domain family, member 30	Multiple_Complex
TC1600011371.hg.1	8.25	9.66	-2.66	SLX1A; SLX1B	SLX1 homolog A, structure-specific endonuclease subunit; SLX1 homolog B, structure-specific endonuclease subunit	Multiple_Complex
TC1200008318.hg.1	7.17	8.58	-2.66	METTL25	methyltransferase like 25	Multiple_Complex
TC0100008074.hg.1	6.63	8.04	-2.66	meepla	Transcript Identified by AceView	Coding
TC0200008902.hg.1	5.68	7.09	-2.66	chawklo	Transcript Identified by AceView	Unassigned
TC0200014365.hg.1	5.1	6.51	-2.66	sawdeebu	Transcript Identified by AceView	Unassigned
TC0600011718.hg.1	3.96	5.37	-2.66	sonure	Transcript Identified by AceView	Unassigned
TC0600009249.hg.1	3.48	4.89	-2.66			NonCoding
TC1100012823.hg.1	3.29	4.7	-2.66	keychor	Transcript Identified by AceView	Coding
TC0500007984.hg.1	3.13	4.55	-2.66	dyskaby	Transcript Identified by AceView	Unassigned
TC1100011818.hg.1	2.51	3.92	-2.66	snoygleebu	Transcript Identified by AceView	Coding
TC1400008963.hg.1	14.37	15.77	-2.65	MBIP	MAP3K12 binding inhibitory protein 1	Multiple_Complex
TC0300006925.hg.1	14.22	15.63	-2.65	TGFBR2	transforming growth factor beta receptor II	Multiple_Complex
TC0500007114.hg.1	12.31	13.72	-2.65	RAI14	retinoic acid induced 14	Multiple_Complex
TC0200011990.hg.1	11.36	12.76	-2.65	PTRHD1	peptidyl-tRNA hydrolase domain containing 1	Multiple_Complex
TC0300012572.hg.1	11.19	12.6	-2.65	CEP70	centrosomal protein 70kDa	Multiple_Complex
TC2200008091.hg.1	9.52	10.93	-2.65	PI4KAP2	phosphatidylinositol 4-kinase, catalytic, alpha pseudogene 2	Multiple_Complex
TC2200008856.hg.1	8.79	10.19	-2.65	NAGA	N-acetylgalactosaminidase, alpha-	Multiple_Complex
TC0800011075.hg.1	7.9	9.3	-2.65	TMEM55A	transmembrane protein 55A	Multiple_Complex
TC2000007817.hg.1	7.75	9.16	-2.65	FAM210B	family with sequence similarity 210, member B	Multiple_Complex
TC2100007446.hg.1	7.44	8.85	-2.65	COL6A1	collagen, type VI, alpha 1	Multiple_Complex
TC1200012270.hg.1	7.04	8.44	-2.65	RILPL2	Rab interacting lysosomal protein-like 2	Multiple_Complex
TC0700010482.hg.1	5.7	7.11	-2.65	PCMTD1P3	protein-L-isoaspartate (D-aspartate) O-methyltransferase domain containing 1 pseudogene 3 [Source:HGNC Symbol;Acc:HGNC:38806]	Multiple_Complex
TC1100012994.hg.1	5.12	6.53	-2.65	CRY2	cryptochrome circadian clock 2	Multiple_Complex
TSUnmapped00000564.hg.1	4.65	6.06	-2.65	GOLGA8O	golgin A8 family member O [Source:HGNC Symbol;Acc:HGNC:44406]	NonCoding
TC0200016749.hg.1	4.57	5.98	-2.65	AC093818.1; rerdar	novel transcript; Transcript Identified by AceView	NonCoding
TC0X00007395.hg.1	4.41	5.81	-2.65	RP11-431N15.2	putative novel transcript	NonCoding
TC0300011786.hg.1	4.1	5.5	-2.65			NonCoding
TC0200014296.hg.1	3.86	5.26	-2.65	pornerbo	Transcript Identified by AceView	Coding
TC0X00008714.hg.1	3.75	5.16	-2.65	snytor	Transcript Identified by AceView	Coding
TC2200006652.hg.1	2.89	4.3	-2.65	smujor	Transcript Identified by AceView	Multiple_Complex
TC1500010422.hg.1	13.32	14.72	-2.64	IDH2	isocitrate dehydrogenase 2 (NADP+), mitochondrial	Multiple_Complex
TC0300011436.hg.1	10.54	11.95	-2.64	SUCLG2	succinate-CoA ligase, GDP-forming, beta subunit	Multiple_Complex
TC0400009029.hg.1	10.21	11.61	-2.64	FHDC1	FH2 domain containing 1	Multiple_Complex
TC1700012452.hg.1	9.94	11.34	-2.64	PLEKHM1P; MIR4315-2	pleckstrin homology domain containing, family M (with RUN domain) member 1 pseudogene; microRNA 4315-2	Multiple_Complex
TC0700013405.hg.1	9.67	11.07	-2.64	BRI3	brain protein I3	Multiple_Complex
TC0400012150.hg.1	9.19	10.59	-2.64	TMEM154	transmembrane protein 154	Multiple_Complex
TC1900010120.hg.1	6.79	8.19	-2.64	CTD-2626G11.2	novel transcript	NonCoding
TSUnmapped00000525.hg.1	6.14	7.54	-2.64	BCL2L14	BCL2-like 14 (apoptosis facilitator)	Coding
TC2000009040.hg.1	5.98	7.38	-2.64	GLRXP		Multiple_Complex
TC1400006954.hg.1	5.95	7.35	-2.64			NonCoding
TC1400009695.hg.1	5.68	7.08	-2.64	RP3-449M8.9	novel transcript	NonCoding
TC1000010562.hg.1	5.46	6.86	-2.64	SYT15; ABC7-42404400C24.1	Homo sapiens synaptotagmin XV (SYT15), transcript variant a, mRNA.; Homo sapiens synaptotagmin XV (SYT15), transcript variant b, mRNA.; Homo sapiens synaptotagmin XV, mRNA (cDNA clone MGC:164845 IMAGE:40147906), complete cds.; Synaptotagmin-15 [Source:UniProtKB/Swiss-Prot;Acc:Q9BQS2]	Coding
TC0300009577.hg.1	5.27	6.67	-2.64			NonCoding
TC1600008535.hg.1	4	5.4	-2.64	fernor	Transcript Identified by AceView	Coding
TC0600007871.hg.1	3.88	5.29	-2.64	sworgluby	Transcript Identified by AceView	Coding
TC1200009609.hg.1	3.44	4.85	-2.64			NonCoding
TC0800011796.hg.1	3.1	4.5	-2.64	LINC00824	long intergenic non-protein coding RNA 824	NonCoding
TC0900007175.hg.1	3.01	4.41	-2.64			NonCoding
TC1100009168.hg.1	11.1	12.5	-2.63	SIDT2	SID1 transmembrane family, member 2	Multiple_Complex
TC1700008452.hg.1	7.93	9.33	-2.63	GDPD1	glycerophosphodiester phosphodiesterase domain containing 1	Multiple_Complex
TC0X00010409.hg.1	5.3	6.7	-2.63	BEX2	brain expressed X-linked 2	Coding
TC0300010002.hg.1	5.26	6.65	-2.63	LINC00885	long intergenic non-protein coding RNA 885	Multiple_Complex
TC0700010706.hg.1	4.79	6.18	-2.63			NonCoding
TC0100011208.hg.1	3.58	4.97	-2.63	symobu	Transcript Identified by AceView	Coding
TC1600007261.hg.1	3.39	4.79	-2.63			NonCoding
TC0500011394.hg.1	3.28	4.67	-2.63	LOC644285	uncharacterized LOC644285	NonCoding
TC0500009740.hg.1	3.2	4.6	-2.63	cherflu	Transcript Identified by AceView	Coding
TC0100006605.hg.1	3.02	4.41	-2.63	MIR4251	microRNA 4251	Multiple_Complex
TC0100009153.hg.1	2.7	4.1	-2.63	DPYD-AS1	DPYD antisense RNA 1	NonCoding
TC1200010093.hg.1	2.55	3.94	-2.63	myswy	Transcript Identified by AceView	Unassigned
TC0300013513.hg.1	16.4	17.79	-2.62	P3H2	prolyl 3-hydroxylase 2	Multiple_Complex
TC0200010502.hg.1	13.68	15.07	-2.62	FAM117B	family with sequence similarity 117, member B	Multiple_Complex
TC0600011943.hg.1	12.8	14.19	-2.62	ENPP5	ectonucleotide pyrophosphatase/phosphodiesterase 5 (putative)	Multiple_Complex
TC0700012848.hg.1	12.11	13.5	-2.62			NonCoding
TC0X00010989.hg.1	12.05	13.44	-2.62	LDOC1	leucine zipper, down-regulated in cancer 1	Multiple_Complex
TC0100011096.hg.1	10.97	12.36	-2.62	NEK7	NIMA-related kinase 7	Multiple_Complex
TC1400008476.hg.1	8.73	10.12	-2.62	BTBD6	BTB (POZ) domain containing 6	Multiple_Complex
TC1600007448.hg.1	6.63	8.02	-2.62	CORO1A	coronin, actin binding protein, 1A	Multiple_Complex
TC0600009051.hg.1	6.52	7.91	-2.62	LACE1	lactation elevated 1	Multiple_Complex
TC0600014223.hg.1	6.42	7.81	-2.62	SLC22A23	solute carrier family 22, member 23	Multiple_Complex
TC0100018417.hg.1	6.16	7.55	-2.62	ALDH4A1	aldehyde dehydrogenase 4 family, member A1	Multiple_Complex
TC0200007642.hg.1	6	7.39	-2.62			NonCoding
TC1000009865.hg.1	5.74	7.13	-2.62	FAM107B	Memczak2013 ALT_ACCEPTOR, ALT_DONOR, coding, INTERNAL, intronic best transcript NM_031453	NonCoding
TC1100010010.hg.1	4.57	5.97	-2.62	blacher	Transcript Identified by AceView	Unassigned
TC1600009578.hg.1	4.51	5.9	-2.62	CTD-2576D5.3		Multiple_Complex
TC1200008688.hg.1	4.36	5.75	-2.62	tachaw	Transcript Identified by AceView	Coding
TC1000007615.hg.1	4.08	5.48	-2.62			NonCoding
TC1200009453.hg.1	4.05	5.44	-2.62	lykarby	Transcript Identified by AceView	Coding
TC0800011880.hg.1	3.91	5.3	-2.62			NonCoding
TC0500007145.hg.1	3.87	5.26	-2.62	SKP2	Transcript Identified by AceView, Entrez Gene ID(s) 6502	Unassigned
TC0800012082.hg.1	3.57	4.96	-2.62			NonCoding
TC1500008697.hg.1	3.41	4.8	-2.62			NonCoding
TC2200008224.hg.1	3.39	4.78	-2.62	zosubo	Transcript Identified by AceView	Coding
TC0800011879.hg.1	3.12	4.51	-2.62			NonCoding
TC0300012147.hg.1	2.79	4.18	-2.62			NonCoding
TC0500009217.hg.1	2.37	3.76	-2.62	kluflo	Transcript Identified by AceView	Unassigned
TC0100007968.hg.1	12.7	14.08	-2.61	NFYC	nuclear transcription factor Y subunit gamma	Multiple_Complex
TC0X00007540.hg.1	12.07	13.45	-2.61	DLG3	discs, large homolog 3 (Drosophila)	Multiple_Complex
TC1200012707.hg.1	12.03	13.41	-2.61	ALDH2	aldehyde dehydrogenase 2 family (mitochondrial)	Multiple_Complex
TC1200012708.hg.1	9.82	11.21	-2.61	OAS1	2-5-oligoadenylate synthetase 1	Multiple_Complex
TC0100018233.hg.1	9.21	10.59	-2.61	FPGT	fucose-1-phosphate guanylyltransferase	Coding
TC1600009530.hg.1	7.93	9.31	-2.61	KIAA0430; MIR6506	KIAA0430; microRNA 6506	Multiple_Complex
TC1400009766.hg.1	7.62	9.01	-2.61	IRF2BPL	interferon regulatory factor 2 binding protein-like	Multiple_Complex
TC0X00007542.hg.1	7.03	8.41	-2.61	plerby	Transcript Identified by AceView	Unassigned
TC0900009978.hg.1	6.65	8.04	-2.61	GNE	glucosamine (UDP-N-acetyl)-2-epimerase/N-acetylmannosamine kinase	Multiple_Complex
TC1700010681.hg.1	6.56	7.94	-2.61	KRT16	keratin 16, type I	Multiple_Complex
TC0200014999.hg.1	6.15	7.53	-2.61	histone.20	Transcript Identified by AceView	Coding
TC0100018265.hg.1	6.13	7.51	-2.61	GSTM5	glutathione S-transferase mu 5	Multiple_Complex
TC0X00011274.hg.1	4.79	6.17	-2.61	TCEANC	transcription elongation factor A (SII) N-terminal and central domain containing	Multiple_Complex
TC2000008783.hg.1	4.62	6.01	-2.61	CFTRP3	cystic fibrosis transmembrane conductance regulator pseudogene 3 [Source:HGNC Symbol;Acc:HGNC:51352]	Multiple_Complex
TC2200007370.hg.1	4.39	5.78	-2.61	slawrar	Transcript Identified by AceView	Coding
TC1800008787.hg.1	3.82	5.21	-2.61	RP11-693L9.2	novel transcript	NonCoding
TC0400010754.hg.1	3.16	4.54	-2.61	morgaw	Transcript Identified by AceView	Unassigned
TC1500007289.hg.1	2.47	3.85	-2.61	RNU2-53P	RNA, U2 small nuclear 53, pseudogene [Source:HGNC Symbol;Acc:HGNC:48546]	Small_RNA
TC0300011355.hg.1	2.23	3.62	-2.61	ID2B	Transcript Identified by AceView, Entrez Gene ID(s) 84099	Unassigned
TC0100010798.hg.1	14.77	16.15	-2.6	QSOX1	quiescin Q6 sulfhydryl oxidase 1	Multiple_Complex
TC1100009709.hg.1	12.29	13.66	-2.6	CHID1	chitinase domain containing 1	Multiple_Complex
TC0100013897.hg.1	10.48	11.86	-2.6	P3H1	prolyl 3-hydroxylase 1	Multiple_Complex
TC0100015234.hg.1	9.52	10.89	-2.6	SLC16A4	solute carrier family 16, member 4	Multiple_Complex
TC1200010686.hg.1	9.04	10.41	-2.6	SLC11A2	solute carrier family 11 (proton-coupled divalent metal ion transporter), member 2	Multiple_Complex
TC0300008017.hg.1	8.35	9.72	-2.6	ZNF654	zinc finger protein 654	Coding
TC0500012426.hg.1	7.95	9.33	-2.6	spaflo	Transcript Identified by AceView	Unassigned
TC1800007031.hg.1	7.65	9.03	-2.6	PGDP1	phosphogluconate dehydrogenase pseudogene 1	Pseudogene
TC0100018229.hg.1	7.55	8.93	-2.6	CYP4B1	cytochrome P450, family 4, subfamily B, polypeptide 1	Multiple_Complex
TC1500009452.hg.1	6.74	8.12	-2.6	GNB5	guanine nucleotide binding protein (G protein), beta 5	Multiple_Complex
TC1100012393.hg.1	6.02	7.4	-2.6	wufer	Transcript Identified by AceView	Unassigned
TC1000011411.hg.1	6.01	7.39	-2.6	PPP1R3C	protein phosphatase 1, regulatory subunit 3C	Multiple_Complex
TC0800009298.hg.1	5.77	7.15	-2.6	TMED10P1	transmembrane emp24-like trafficking protein 10 (yeast) pseudogene 1	Multiple_Complex
TC0200008452.hg.1	4.5	5.88	-2.6	MAL	mal, T-cell differentiation protein	Multiple_Complex
TC0100011577.hg.1	4.31	5.69	-2.6	smybo	Transcript Identified by AceView	Unassigned
TC0300012966.hg.1	3.78	5.16	-2.6	IL12A-AS1	IL12A antisense RNA 1	NonCoding
TC0600007495.hg.1	12.22	13.59	-2.59	HLA-A	major histocompatibility complex, class I, A	Multiple_Complex
TC1600008646.hg.1	10.47	11.84	-2.59	ATP2C2	ATPase, Ca++ transporting, type 2C, member 2	Multiple_Complex
TC2200009356.hg.1	9.71	11.08	-2.59	ARFGAP3	ADP-ribosylation factor GTPase activating protein 3	Multiple_Complex
TC0600011144.hg.1	9.35	10.72	-2.59			NonCoding
TC0400006661.hg.1	9.22	10.6	-2.59	STK32B	serine/threonine kinase 32B	Multiple_Complex
TC0100009280.hg.1	6.49	7.86	-2.59	AC092506.1		Precursor_microRNA
TC0100017492.hg.1	6.02	7.4	-2.59			NonCoding
TC0X00007044.hg.1	5.99	7.36	-2.59			NonCoding
TC1600006478.hg.1	5.93	7.31	-2.59	vuru	Transcript Identified by AceView	Coding
TC0Y00006593.hg.1	5.45	6.82	-2.59	PCMTD1P1	protein-L-isoaspartate (D-aspartate) O-methyltransferase domain containing 1 pseudogene 1 [Source:HGNC Symbol;Acc:HGNC:38804]	Multiple_Complex
TC1600008920.hg.1	5.25	6.62	-2.59			NonCoding
[truncated: 6,058 more rows]
